# Supplementary material for: Human papillomavirus infection and follow-up on positive results in 7222 female samples obtained from 2016 to 2019 in Hefei, China
Source: PeerJ. 2020 Oct 20;8:e10179. doi: 10.7717/peerj.10179 (PMC7583622; doi:10.7717/peerj.10179)
Supplement: Supplemental Information 1 — 1068 women had HPV infections, including single infection and multiple infections. [file peerj-08-10179-s001.xlsx]

## Sheet: Data on women infected with HPV
Time	Record	Age	HPV genotype	Result
2016-07-28	22041101	59	hpv39	Positive(+)
2016-07-28	22041101	59	hpv42	Positive(+)
2016-07-28	22041101	59	hpv66	Positive(+)
2016-07-28	26027105	31	hpv06	Positive(+)
2016-07-28	89882109	44	hpv55	Positive(+)
2016-08-04	28259105	46	hpv53	Positive(+)
2016-08-11	00621113	45	hpv16	Positive(+)
2016-08-18	10026102	32	hpv58	Positive(+)
2016-08-18	00019104	42	hpv82	Positive(+)
2016-08-18	00001108	48	hpv16	Positive(+)
2016-08-18	17003116	34	hpv16	Positive(+)
2016-08-25	18257111	40	hpv59	Positive(+)
2016-08-25	00001118	27	hpv56	Positive(+)
2016-09-01	25014105	33	hpv43	Positive(+)
2016-09-01	17079109	43	hpv44	Positive(+)
2016-09-01	13002117	38	hpv53	Positive(+)
2016-09-05	01018103	44	hpv16	Positive(+)
2016-09-08	00032111	26	hpv55	Positive(+)
2016-09-08	00032111	26	hpv61	Positive(+)
2016-09-08	01256114	40	hpv16	Positive(+)
2016-09-08	07005117	46	hpv43	Positive(+)
2016-09-08	07005117	46	hpv51	Positive(+)
2016-09-18	09033104	27	hpv11	Positive(+)
2016-09-18	09033104	27	hpv43	Positive(+)
2016-09-18	09033104	27	hpv58	Positive(+)
2016-09-18	12256107	40	hpv61	Positive(+)
2016-09-18	00015108	28	hpv39	Positive(+)
2016-09-18	00001112	46	hpv61	Positive(+)
2016-09-22	00008104	42	hpv35	Positive(+)
2016-09-22	00022110	39	hpv43	Positive(+)
2016-09-22	19022111	45	hpv58	Positive(+)
2016-09-22	00004112	53	hpv18	Positive(+)
2016-09-22	00009121	55	hpv66	Positive(+)
2016-09-29	19133107	53	hpv61	Positive(+)
2016-09-29	19133107	53	hpv68	Positive(+)
2016-09-29	26049108	51	hpv53	Positive(+)
2016-09-29	12058109	44	hpv42	Positive(+)
2016-09-29	12058109	44	hpv55	Positive(+)
2016-09-29	28201115	42	hpv33	Positive(+)
2016-10-14	00319102	42	hpv81	Positive(+)
2016-10-14	07088106	45	hpv81	Positive(+)
2016-10-21	00460105	32	hpv06	Positive(+)
2016-10-21	25007109	27	hpv59	Positive(+)
2016-10-21	03186113	39	hpv39	Positive(+)
2016-10-29	94344112	31	hpv58	Positive(+)
2016-10-29	14047114	37	hpv18	Positive(+)
2016-10-29	00197120	60	hpv56	Positive(+)
2016-10-29	00235124	45	hpv61	Positive(+)
2016-10-29	00248131	48	hpv82	Positive(+)
2016-10-29	00621136	40	hpv16	Positive(+)
2016-10-29	00621136	40	hpv18	Positive(+)
2016-10-29	26003139	30	hpv40	Positive(+)
2016-10-29	26003139	30	hpv66	Positive(+)
2016-10-29	29666140	54	hpv16	Positive(+)
2016-10-29	29666140	54	hpv43	Positive(+)
2016-10-29	29666140	54	hpv61	Positive(+)
2016-10-29	29666140	54	hpv81	Positive(+)
2016-10-29	04154141	45	hpv11	Positive(+)
2016-11-03	00413127	38	hpv55	Positive(+)
2016-11-03	00431130	23	hpv33	Positive(+)
2016-11-03	00204136	42	hpv16	Positive(+)
2016-11-03	00204136	42	hpv33	Positive(+)
2016-11-11	00016101	53	hpv39	Positive(+)
2016-11-11	00802104	34	hpv16	Positive(+)
2016-11-11	00061106	35	hpv39	Positive(+)
2016-11-11	00097107	40	hpv51	Positive(+)
2016-11-11	00078109	47	hpv58	Positive(+)
2016-11-11	00854112	22	hpv81	Positive(+)
2016-11-11	00832127	27	hpv56	Positive(+)
2016-11-11	00638132	39	hpv42	Positive(+)
2016-11-18	11005103	67	hpv18	Positive(+)
2016-11-18	14045112	38	hpv42	Positive(+)
2016-11-18	14045112	38	hpv61	Positive(+)
2016-11-18	15253114	45	hpv33	Positive(+)
2016-11-18	15253114	45	hpv52	Positive(+)
2016-11-18	15253114	45	hpv66	Positive(+)
2016-11-18	15022116	29	hpv66	Positive(+)
2016-11-25	00007122	28	hpv43	Positive(+)
2016-11-25	00066135	50	hpv39	Positive(+)
2016-11-25	00079142	52	hpv61	Positive(+)
2016-11-25	21021143	49	hpv58	Positive(+)
2016-12-02	94308113	35	hpv16	Positive(+)
2016-12-02	00061118	51	hpv42	Positive(+)
2016-12-02	00061118	51	hpv61	Positive(+)
2016-12-08	02036107	32	hpv55	Positive(+)
2016-12-08	06202109	36	hpv33	Positive(+)
2016-12-08	05232110	55	hpv33	Positive(+)
2016-12-08	94408113	41	hpv33	Positive(+)
2016-12-13	17010104	35	hpv18	Positive(+)
2016-12-13	00179105	47	hpv42	Positive(+)
2016-12-15	00173118	45	hpv39	Positive(+)
2016-12-15	00173118	45	hpv52	Positive(+)
2016-12-23	09021101	24	hpv66	Positive(+)
2016-12-23	09021101	24	hpv82	Positive(+)
2016-12-23	00084106	47	hpv43	Positive(+)
2016-12-23	00084106	47	hpv52	Positive(+)
2016-12-30	00002106	48	hpv81	Positive(+)
2016-12-30	00001108	44	hpv56	Positive(+)
2016-12-30	00010111	48	hpv43	Positive(+)
2016-12-30	00011113	48	hpv66	Positive(+)
2016-12-30	19263114	33	hpv42	Positive(+)
2016-12-30	28014120	24	hpv58	Positive(+)
2017-01-20	00001108	76	hpv43	Positive(+)
2017-01-20	13256109	33	hpv55	Positive(+)
2017-01-20	00051119	43	hpv43	Positive(+)
2017-01-26	00080101	51	hpv43	Positive(+)
2017-02-10	15029103	34	hpv16	Positive(+)
2017-02-10	07011105	40	hpv18	Positive(+)
2017-02-17	09003104	57	hpv16	Positive(+)
2017-02-17	09003104	57	hpv58	Positive(+)
2017-02-17	52114111	54	hpv52	Positive(+)
2017-02-17	52113112	58	hpv51	Positive(+)
2017-02-24	20020106	44	hpv53	Positive(+)
2017-02-24	17013108	33	hpv16	Positive(+)
2017-03-03	00046106	37	hpv16	Positive(+)
2017-03-03	00021115	41	hpv58	Positive(+)
2017-03-03	00026120	33	hpv52	Positive(+)
2017-03-03	00002129	42	hpv55	Positive(+)
2017-03-03	00037130	62	hpv33	Positive(+)
2017-03-03	00012131	36	hpv52	Positive(+)
2017-03-03	00012131	36	hpv81	Positive(+)
2017-03-07	00040101	42	hpv51	Positive(+)
2017-03-07	03099106	44	hpv68	Positive(+)
2017-03-07	00107123	34	hpv18	Positive(+)
2017-03-08	00121147	27	hpv43	Positive(+)
2017-03-08	00121147	27	hpv51	Positive(+)
2017-03-08	00121147	27	hpv53	Positive(+)
2017-03-08	00121147	27	hpv55	Positive(+)
2017-03-08	00121147	27	hpv68	Positive(+)
2017-03-08	00027156	40	hpv61	Positive(+)
2017-03-08	00027156	40	hpv81	Positive(+)
2017-03-08	00104167	55	hpv55	Positive(+)
2017-03-08	00074172	54	hpv58	Positive(+)
2017-03-14	00185183	51	hpv81	Positive(+)
2017-03-14	97975185	43	hpv55	Positive(+)
2017-03-14	97975185	43	hpv58	Positive(+)
2017-03-14	03192187	50	hpv16	Positive(+)
2017-03-14	03190191	54	hpv52	Positive(+)
2017-03-14	13049196	40	hpv44	Positive(+)
2017-03-14	00077199	51	hpv52	Positive(+)
2017-03-14	00019206	30	hpv16	Positive(+)
2017-03-14	00019206	30	hpv44	Positive(+)
2017-03-14	00019206	30	hpv06	Positive(+)
2017-03-15	00053217	50	hpv16	Positive(+)
2017-03-15	00053217	50	hpv81	Positive(+)
2017-03-15	00062225	44	hpv35	Positive(+)
2017-03-16	14166236	55	hpv40	Positive(+)
2017-03-16	14166236	55	hpv61	Positive(+)
2017-03-16	00117253	47	hpv82	Positive(+)
2017-03-16	00176264	46	hpv16	Positive(+)
2017-03-16	00272273	46	hpv43	Positive(+)
2017-03-17	00014110	50	hpv52	Positive(+)
2017-03-17	00014110	50	hpv53	Positive(+)
2017-03-17	00014110	50	hpv58	Positive(+)
2017-03-17	00014110	50	hpv59	Positive(+)
2017-03-17	00234111	38	hpv33	Positive(+)
2017-03-17	00002114	46	hpv16	Positive(+)
2017-03-17	00002114	46	hpv81	Positive(+)
2017-03-17	00043116	25	hpv81	Positive(+)
2017-03-17	00024117	53	hpv53	Positive(+)
2017-03-17	00024117	53	hpv58	Positive(+)
2017-03-17	00082121	35	hpv16	Positive(+)
2017-03-17	00018125	42	hpv44	Positive(+)
2017-03-17	00079130	47	hpv81	Positive(+)
2017-03-17	00115133	45	hpv53	Positive(+)
2017-03-17	00095136	45	hpv52	Positive(+)
2017-03-17	00126142	49	hpv55	Positive(+)
2017-03-17	00070149	50	hpv52	Positive(+)
2017-03-17	00037150	54	hpv51	Positive(+)
2017-03-17	00005152	44	hpv06	Positive(+)
2017-03-17	00086160	47	hpv58	Positive(+)
2017-03-17	00106170	46	hpv16	Positive(+)
2017-03-17	00014173	44	hpv53	Positive(+)
2017-03-17	00108181	48	hpv55	Positive(+)
2017-03-17	00083185	42	hpv45	Positive(+)
2017-03-17	00175197	46	hpv16	Positive(+)
2017-03-17	00175197	46	hpv44	Positive(+)
2017-03-17	00090198	49	hpv16	Positive(+)
2017-03-17	00090198	49	hpv61	Positive(+)
2017-03-17	00088276	47	hpv43	Positive(+)
2017-03-17	00088276	47	hpv45	Positive(+)
2017-03-17	00088276	47	hpv59	Positive(+)
2017-03-17	00035286	34	hpv16	Positive(+)
2017-03-17	00098289	52	hpv53	Positive(+)
2017-03-17	00100292	44	hpv11	Positive(+)
2017-03-17	00289295	46	hpv51	Positive(+)
2017-03-22	00311107	34	hpv16	Positive(+)
2017-03-22	00311107	34	hpv58	Positive(+)
2017-03-22	00075120	41	hpv39	Positive(+)
2017-03-22	00075120	41	hpv61	Positive(+)
2017-03-22	00016132	31	hpv53	Positive(+)
2017-03-22	00016132	31	hpv66	Positive(+)
2017-03-22	00030135	32	hpv58	Positive(+)
2017-03-22	00039137	31	hpv55	Positive(+)
2017-03-22	00014144	37	hpv52	Positive(+)
2017-03-22	00014144	37	hpv68	Positive(+)
2017-03-22	00014144	37	hpv81	Positive(+)
2017-03-24	00301156	35	hpv61	Positive(+)
2017-03-24	00126167	47	hpv39	Positive(+)
2017-03-24	00126167	47	hpv61	Positive(+)
2017-03-24	00126167	47	hpv81	Positive(+)
2017-03-24	00019170	49	hpv33	Positive(+)
2017-03-24	00092176	41	hpv43	Positive(+)
2017-03-24	00162178	46	hpv16	Positive(+)
2017-03-24	00008179	48	hpv61	Positive(+)
2017-03-24	00032180	27	hpv58	Positive(+)
2017-03-24	00080181	49	hpv16	Positive(+)
2017-03-24	00230186	51	hpv31	Positive(+)
2017-03-24	00230186	51	hpv52	Positive(+)
2017-03-24	00194187	45	hpv18	Positive(+)
2017-03-24	00194187	45	hpv53	Positive(+)
2017-03-24	00139192	30	hpv56	Positive(+)
2017-03-28	00287203	38	hpv66	Positive(+)
2017-03-28	00101211	48	hpv55	Positive(+)
2017-03-28	00071212	41	hpv40	Positive(+)
2017-03-28	00078215	45	hpv53	Positive(+)
2017-03-28	00030223	48	hpv39	Positive(+)
2017-03-29	00018227	46	hpv33	Positive(+)
2017-03-29	00171238	53	hpv35	Positive(+)
2017-03-30	00026243	49	hpv55	Positive(+)
2017-03-30	00026243	49	hpv83	Positive(+)
2017-03-30	00211247	35	hpv42	Positive(+)
2017-03-30	00211247	35	hpv66	Positive(+)
2017-03-30	00211247	35	hpv83	Positive(+)
2017-04-08	05301255	39	hpv43	Positive(+)
2017-04-10	28321264	36	hpv52	Positive(+)
2017-04-14	00009271	49	hpv53	Positive(+)
2017-04-18	12068286	32	hpv55	Positive(+)
2017-05-04	07480302	48	hpv52	Positive(+)
2017-05-04	50923307	49	hpv35	Positive(+)
2017-05-04	50923307	49	hpv51	Positive(+)
2017-05-04	50840318	53	hpv40	Positive(+)
2017-05-04	50840318	53	hpv44	Positive(+)
2017-05-12	00004327	43	hpv16	Positive(+)
2017-05-12	00416338	52	hpv58	Positive(+)
2017-05-18	13308381	43	hpv82	Positive(+)
2017-05-26	51104408	36	hpv52	Positive(+)
2017-06-02	19321411	38	hpv81	Positive(+)
2017-06-02	16827419	49	hpv61	Positive(+)
2017-06-09	26954421	52	hpv61	Positive(+)
2017-06-16	31520434	50	hpv43	Positive(+)
2017-06-16	31520434	50	hpv61	Positive(+)
2017-06-16	31520434	50	hpv81	Positive(+)
2017-06-16	16072442	31	hpv16	Positive(+)
2017-06-16	14075444	39	hpv44	Positive(+)
2017-06-16	14075444	39	hpv52	Positive(+)
2017-06-16	13314454	28	hpv55	Positive(+)
2017-06-23	31255466	37	hpv39	Positive(+)
2017-06-23	27969470	31	hpv52	Positive(+)
2017-06-30	34804482	29	hpv33	Positive(+)
2017-07-07	41741492	61	hpv39	Positive(+)
2017-07-07	41741492	61	hpv61	Positive(+)
2017-07-14	43570500	49	hpv66	Positive(+)
2017-07-14	45294508	44	hpv39	Positive(+)
2017-07-14	34796509	38	hpv66	Positive(+)
2017-07-27	19586513	55	hpv16	Positive(+)
2017-07-27	19586513	55	hpv42	Positive(+)
2017-07-27	19586513	55	hpv44	Positive(+)
2017-07-27	19586513	55	hpv56	Positive(+)
2017-07-27	39079522	39	hpv83	Positive(+)
2017-07-27	48323527	41	hpv31	Positive(+)
2017-08-04	58030529	47	hpv43	Positive(+)
2017-08-04	59635533	33	hpv45	Positive(+)
2017-08-17	66623546	55	hpv56	Positive(+)
2017-08-17	66570548	23	hpv16	Positive(+)
2017-08-17	66570548	23	hpv53	Positive(+)
2017-08-17	62939549	39	hpv51	Positive(+)
2017-08-17	62939549	39	hpv68	Positive(+)
2017-08-25	68087555	46	hpv81	Positive(+)
2017-08-25	00037556	43	hpv52	Positive(+)
2017-08-31	69612565	50	hpv56	Positive(+)
2017-08-31	69626567	45	hpv39	Positive(+)
2017-08-31	69997568	36	hpv33	Positive(+)
2017-08-31	69997568	36	hpv52	Positive(+)
2017-08-31	69962570	56	hpv42	Positive(+)
2017-08-31	69675572	36	hpv31	Positive(+)
2017-08-31	71099573	45	hpv44	Positive(+)
2017-08-31	71497574	54	hpv18	Positive(+)
2017-08-31	63035576	33	hpv18	Positive(+)
2017-08-31	63035576	33	hpv52	Positive(+)
2017-08-31	69627579	49	hpv33	Positive(+)
2017-08-31	69483581	47	hpv81	Positive(+)
2017-08-31	70075598	49	hpv44	Positive(+)
2017-08-31	69782618	69	hpv59	Positive(+)
2017-08-31	70060619	55	hpv55	Positive(+)
2017-08-31	69660622	42	hpv55	Positive(+)
2017-08-31	69660622	42	hpv82	Positive(+)
2017-08-31	69850627	59	hpv06	Positive(+)
2017-09-08	53210638	54	hpv66	Positive(+)
2017-09-08	68006642	44	hpv53	Positive(+)
2017-09-08	61050650	52	hpv40	Positive(+)
2017-09-08	69880655	59	hpv53	Positive(+)
2017-09-08	69802657	60	hpv81	Positive(+)
2017-09-14	69868683	64	hpv56	Positive(+)
2017-09-14	68083684	34	hpv53	Positive(+)
2017-09-14	68083684	34	hpv61	Positive(+)
2017-09-14	81034685	46	hpv66	Positive(+)
2017-09-14	69941686	57	hpv51	Positive(+)
2017-09-14	69941686	57	hpv66	Positive(+)
2017-09-14	81124692	54	hpv39	Positive(+)
2017-09-14	81122695	50	hpv66	Positive(+)
2017-09-20	69923706	57	hpv61	Positive(+)
2017-09-20	71143707	70	hpv16	Positive(+)
2017-09-20	68204711	48	hpv53	Positive(+)
2017-09-20	69625716	35	hpv44	Positive(+)
2017-09-20	69756720	63	hpv06	Positive(+)
2017-09-20	82359731	31	hpv51	Positive(+)
2017-09-20	70085732	53	hpv81	Positive(+)
2017-09-20	69989738	60	hpv68	Positive(+)
2017-09-20	82376745	49	hpv35	Positive(+)
2017-09-20	82386749	52	hpv40	Positive(+)
2017-09-20	82386749	52	hpv81	Positive(+)
2017-09-20	69956758	56	hpv81	Positive(+)
2017-09-20	69942763	57	hpv61	Positive(+)
2017-09-20	69942763	57	hpv81	Positive(+)
2017-09-21	83940774	45	hpv18	Positive(+)
2017-09-21	83940774	45	hpv52	Positive(+)
2017-09-21	82433781	28	hpv42	Positive(+)
2017-09-21	82986783	51	hpv33	Positive(+)
2017-09-21	82986783	51	hpv52	Positive(+)
2017-09-21	82986783	51	hpv58	Positive(+)
2017-09-21	82939784	46	hpv58	Positive(+)
2017-09-21	83905794	32	hpv43	Positive(+)
2017-09-21	82404796	48	hpv52	Positive(+)
2017-09-21	82418801	50	hpv61	Positive(+)
2017-09-21	82418801	50	hpv68	Positive(+)
2017-09-21	83026803	47	hpv59	Positive(+)
2017-09-21	82351813	51	hpv42	Positive(+)
2017-09-21	69842818	58	hpv53	Positive(+)
2017-09-21	69842818	58	hpv68	Positive(+)
2017-09-22	83730833	48	hpv56	Positive(+)
2017-09-22	83027835	45	hpv66	Positive(+)
2017-09-22	82916846	51	hpv42	Positive(+)
2017-09-22	82996848	46	hpv55	Positive(+)
2017-09-22	82145853	34	hpv16	Positive(+)
2017-09-22	82145853	34	hpv33	Positive(+)
2017-09-22	82145853	34	hpv51	Positive(+)
2017-09-22	82143854	45	hpv44	Positive(+)
2017-09-22	84045856	52	hpv52	Positive(+)
2017-09-22	84706859	49	hpv52	Positive(+)
2017-09-22	83679861	30	hpv43	Positive(+)
2017-09-25	83054886	43	hpv45	Positive(+)
2017-09-25	83054886	43	hpv81	Positive(+)
2017-09-25	83583889	31	hpv39	Positive(+)
2017-09-25	83573893	35	hpv82	Positive(+)
2017-09-25	83729896	28	hpv16	Positive(+)
2017-09-25	83729896	28	hpv68	Positive(+)
2017-09-25	83098920	44	hpv56	Positive(+)
2017-09-25	16075933	70	hpv16	Positive(+)
2017-09-25	83389953	51	hpv58	Positive(+)
2017-09-25	83130964	47	hpv52	Positive(+)
2017-09-25	83093968	34	hpv58	Positive(+)
2017-09-27	83557972	36	hpv51	Positive(+)
2017-09-27	82931976	42	hpv16	Positive(+)
2017-09-27	69959982	56	hpv45	Positive(+)
2017-09-27	83222983	45	hpv18	Positive(+)
2017-09-27	83527995	35	hpv45	Positive(+)
2017-09-27	83119999	30	hpv58	Positive(+)
2017-09-27	83201019	45	hpv45	Positive(+)
2017-09-27	83607026	34	hpv58	Positive(+)
2017-09-27	83202032	44	hpv45	Positive(+)
2017-09-27	83072042	48	hpv56	Positive(+)
2017-09-27	83449048	48	hpv55	Positive(+)
2017-09-27	83047049	54	hpv45	Positive(+)
2017-09-27	83047049	54	hpv53	Positive(+)
2017-09-28	83783069	28	hpv52	Positive(+)
2017-09-28	83632074	30	hpv16	Positive(+)
2017-09-28	83313077	49	hpv11	Positive(+)
2017-09-28	83313077	49	hpv52	Positive(+)
2017-09-28	83304083	49	hpv33	Positive(+)
2017-09-28	83304083	49	hpv35	Positive(+)
2017-09-28	84201087	54	hpv58	Positive(+)
2017-09-28	83274088	52	hpv43	Positive(+)
2017-09-28	84053089	51	hpv52	Positive(+)
2017-09-28	83758098	27	hpv39	Positive(+)
2017-09-28	83851099	48	hpv52	Positive(+)
2017-09-28	83851099	48	hpv58	Positive(+)
2017-09-29	82955106	29	hpv45	Positive(+)
2017-09-29	87485117	32	hpv61	Positive(+)
2017-09-29	88509126	30	hpv82	Positive(+)
2017-09-29	84206132	35	hpv42	Positive(+)
2017-09-29	83416141	31	hpv39	Positive(+)
2017-09-29	83321148	52	hpv39	Positive(+)
2017-09-30	87457154	30	hpv56	Positive(+)
2017-09-30	84195161	37	hpv51	Positive(+)
2017-09-30	83385164	31	hpv58	Positive(+)
2017-09-30	83385164	31	hpv61	Positive(+)
2017-09-30	83538176	28	hpv45	Positive(+)
2017-09-30	83324182	28	hpv56	Positive(+)
2017-09-30	84135184	52	hpv45	Positive(+)
2017-09-30	83237190	43	hpv56	Positive(+)
2017-09-30	84073202	48	hpv53	Positive(+)
2017-09-30	84073202	48	hpv58	Positive(+)
2017-09-30	83509207	48	hpv61	Positive(+)
2017-09-30	83238211	49	hpv39	Positive(+)
2017-09-30	83343212	28	hpv52	Positive(+)
2017-09-30	83452214	48	hpv52	Positive(+)
2017-10-09	84070219	30	hpv61	Positive(+)
2017-10-09	84077220	28	hpv16	Positive(+)
2017-10-09	83141225	51	hpv52	Positive(+)
2017-10-09	84226227	31	hpv61	Positive(+)
2017-10-09	90872237	25	hpv16	Positive(+)
2017-10-09	84251243	40	hpv53	Positive(+)
2017-10-09	83065260	44	hpv33	Positive(+)
2017-10-12	83133275	28	hpv43	Positive(+)
2017-10-12	83133275	28	hpv58	Positive(+)
2017-10-12	83205279	35	hpv45	Positive(+)
2017-10-12	83366282	46	hpv58	Positive(+)
2017-10-12	83661283	35	hpv61	Positive(+)
2017-10-12	72623289	48	hpv51	Positive(+)
2017-10-12	72623289	48	hpv53	Positive(+)
2017-10-12	82206293	47	hpv55	Positive(+)
2017-10-12	83082298	41	hpv40	Positive(+)
2017-10-12	90797309	42	hpv45	Positive(+)
2017-10-12	90802313	32	hpv45	Positive(+)
2017-10-12	91801322	50	hpv51	Positive(+)
2017-10-19	83653336	28	hpv16	Positive(+)
2017-10-19	83653336	28	hpv44	Positive(+)
2017-10-19	91285356	42	hpv45	Positive(+)
2017-10-19	83722366	48	hpv58	Positive(+)
2017-10-26	83024411	30	hpv44	Positive(+)
2017-10-26	83476418	45	hpv31	Positive(+)
2017-11-03	01880439	54	hpv16	Positive(+)
2017-11-03	02086456	46	hpv39	Positive(+)
2017-11-03	02122460	45	hpv53	Positive(+)
2017-11-03	02099485	56	hpv39	Positive(+)
2017-11-03	02099485	56	hpv42	Positive(+)
2017-11-03	83746500	31	hpv66	Positive(+)
2017-11-03	83804504	31	hpv39	Positive(+)
2017-11-03	83804504	31	hpv82	Positive(+)
2017-11-07	04186517	38	hpv66	Positive(+)
2017-11-07	08107519	80	hpv43	Positive(+)
2017-11-07	08053528	53	hpv52	Positive(+)
2017-11-07	08053528	53	hpv59	Positive(+)
2017-11-07	08033540	42	hpv53	Positive(+)
2017-11-07	07953554	30	hpv40	Positive(+)
2017-11-07	07953554	30	hpv82	Positive(+)
2017-11-07	07960564	41	hpv52	Positive(+)
2017-11-07	07969588	49	hpv43	Positive(+)
2017-11-07	03548601	28	hpv66	Positive(+)
2017-11-09	07637609	43	hpv16	Positive(+)
2017-11-13	69564614	42	hpv39	Positive(+)
2017-11-13	08041650	29	hpv31	Positive(+)
2017-11-13	08041650	29	hpv82	Positive(+)
2017-11-16	13395682	47	hpv53	Positive(+)
2017-11-16	13398684	65	hpv52	Positive(+)
2017-11-16	13399685	24	hpv44	Positive(+)
2017-11-16	09401688	54	hpv53	Positive(+)
2017-11-16	94248689	43	hpv51	Positive(+)
2017-11-16	08014690	35	hpv52	Positive(+)
2017-11-16	08014690	35	hpv55	Positive(+)
2017-11-16	08014690	35	hpv58	Positive(+)
2017-11-16	08014690	35	hpv81	Positive(+)
2017-11-23	05885704	36	hpv81	Positive(+)
2017-11-23	03639708	41	hpv43	Positive(+)
2017-11-23	03639708	41	hpv06	Positive(+)
2017-11-23	11247710	47	hpv52	Positive(+)
2017-11-23	11200714	51	hpv52	Positive(+)
2017-11-23	11199722	52	hpv55	Positive(+)
2017-11-23	16747727	36	hpv39	Positive(+)
2017-11-23	14311731	34	hpv51	Positive(+)
2017-11-23	16134737	46	hpv16	Positive(+)
2017-11-23	16134737	46	hpv56	Positive(+)
2017-11-30	27167758	38	hpv58	Positive(+)
2017-11-30	13844787	44	hpv51	Positive(+)
2017-12-07	07915806	44	hpv16	Positive(+)
2018-01-18	31020866	40	hpv66	Positive(+)
2018-01-18	30624870	42	hpv61	Positive(+)
2018-01-18	30596871	44	hpv31	Positive(+)
2018-01-18	30613872	53	hpv55	Positive(+)
2018-01-18	30613872	53	hpv61	Positive(+)
2018-01-18	30600873	44	hpv58	Positive(+)
2018-02-22	32929892	54	hpv53	Positive(+)
2018-02-22	32929892	54	hpv55	Positive(+)
2018-02-22	33701893	34	hpv58	Positive(+)
2018-02-22	24449894	49	hpv42	Positive(+)
2018-02-22	24449894	49	hpv81	Positive(+)
2018-03-08	37389910	32	hpv52	Positive(+)
2018-03-16	37666914	36	hpv18	Positive(+)
2018-03-16	37286916	54	hpv81	Positive(+)
2018-03-16	37286916	54	hpv83	Positive(+)
2018-03-16	36332920	44	hpv81	Positive(+)
2018-03-22	37584939	39	hpv58	Positive(+)
2018-03-28	38937944	32	hpv66	Positive(+)
2018-03-28	38937944	32	hpv55	Positive(+)
2018-04-04	72709951	41	hpv42	Positive(+)
2018-04-04	72709951	41	hpv81	Positive(+)
2018-04-04	47246953	43	hpv39	Positive(+)
2018-04-04	47246953	43	hpv55	Positive(+)
2018-04-04	45387954	44	hpv18	Positive(+)
2018-04-04	45387954	44	hpv39	Positive(+)
2018-04-04	47286961	29	hpv51	Positive(+)
2018-04-04	47286961	29	hpv11	Positive(+)
2018-04-04	44587963	37	hpv18	Positive(+)
2018-04-04	44591968	45	hpv16	Positive(+)
2018-04-12	44685974	49	hpv61	Positive(+)
2018-04-12	48579979	42	hpv16	Positive(+)
2018-04-12	50228980	39	hpv61	Positive(+)
2018-04-12	50517985	47	hpv44	Positive(+)
2018-04-19	51603988	33	hpv45	Positive(+)
2018-04-19	51603988	33	hpv56	Positive(+)
2018-04-19	04566994	48	hpv51	Positive(+)
2018-04-19	51900000	50	hpv26	Positive(+)
2018-04-19	51900000	50	hpv43	Positive(+)
2018-04-19	46987003	46	hpv53	Positive(+)
2018-04-19	46976007	53	hpv66	Positive(+)
2018-04-19	53342027	37	hpv55	Positive(+)
2018-04-19	53230031	35	hpv55	Positive(+)
2018-04-19	48485041	31	hpv52	Positive(+)
2018-04-26	53979059	33	hpv51	Positive(+)
2018-04-26	31868077	50	hpv16	Positive(+)
2018-04-26	31868077	50	hpv39	Positive(+)
2018-04-26	31868077	50	hpv43	Positive(+)
2018-05-03	53229091	39	hpv52	Positive(+)
2018-05-03	18377098	49	hpv43	Positive(+)
2018-05-10	54954113	35	hpv61	Positive(+)
2018-05-10	60618122	30	hpv35	Positive(+)
2018-05-10	58109129	37	hpv52	Positive(+)
2018-05-10	58109129	37	hpv43	Positive(+)
2018-05-10	61005133	35	hpv82	Positive(+)
2018-05-10	52075137	55	hpv16	Positive(+)
2018-05-10	57113139	42	hpv52	Positive(+)
2018-05-17	58106168	44	hpv16	Positive(+)
2018-05-23	16333194	32	hpv31	Positive(+)
2018-05-23	16333194	32	hpv58	Positive(+)
2018-05-23	16314199	39	hpv43	Positive(+)
2018-05-23	16290235	49	hpv45	Positive(+)
2018-05-23	16695236	56	hpv55	Positive(+)
2018-05-23	66564238	54	hpv66	Positive(+)
2018-05-23	16440253	38	hpv16	Positive(+)
2018-05-23	16086264	33	hpv51	Positive(+)
2018-05-23	16086264	33	hpv43	Positive(+)
2018-05-23	16086264	33	hpv61	Positive(+)
2018-05-23	16685272	38	hpv16	Positive(+)
2018-05-23	16685272	38	hpv68	Positive(+)
2018-05-23	67364277	52	hpv59	Positive(+)
2018-06-01	16328285	37	hpv39	Positive(+)
2018-06-01	68933288	48	hpv44	Positive(+)
2018-06-01	05787295	31	hpv40	Positive(+)
2018-06-01	05787295	31	hpv44	Positive(+)
2018-06-01	31397297	38	hpv52	Positive(+)
2018-06-01	31397297	38	hpv56	Positive(+)
2018-06-01	31397297	38	hpv61	Positive(+)
2018-06-01	55247299	42	hpv55	Positive(+)
2018-06-01	31419301	68	hpv16	Positive(+)
2018-06-01	07615303	59	hpv51	Positive(+)
2018-06-01	19327304	34	hpv56	Positive(+)
2018-06-01	19327304	34	hpv42	Positive(+)
2018-06-01	07614308	54	hpv16	Positive(+)
2018-06-01	19328311	34	hpv61	Positive(+)
2018-06-01	16129313	50	hpv52	Positive(+)
2018-06-01	16537318	46	hpv43	Positive(+)
2018-06-07	15928344	50	hpv81	Positive(+)
2018-06-07	19319345	35	hpv52	Positive(+)
2018-06-07	63272348	29	hpv33	Positive(+)
2018-06-07	34190350	44	hpv39	Positive(+)
2018-06-14	16315360	50	hpv06	Positive(+)
2018-06-14	16066370	36	hpv52	Positive(+)
2018-06-14	74855371	39	hpv18	Positive(+)
2018-06-14	74625373	45	hpv18	Positive(+)
2018-06-21	16409385	34	hpv68	Positive(+)
2018-06-21	76771388	62	hpv52	Positive(+)
2018-06-21	75373389	66	hpv52	Positive(+)
2018-06-21	77364392	55	hpv52	Positive(+)
2018-06-21	77364392	55	hpv53	Positive(+)
2018-06-21	51657395	31	hpv52	Positive(+)
2018-06-28	77809402	59	hpv52	Positive(+)
2018-06-28	78229403	66	hpv51	Positive(+)
2018-06-28	05387406	33	hpv39	Positive(+)
2018-06-28	05387406	33	hpv81	Positive(+)
2018-06-28	78559407	60	hpv53	Positive(+)
2018-06-28	79017413	40	hpv43	Positive(+)
2018-07-05	80507426	31	hpv61	Positive(+)
2018-07-05	79912427	31	hpv66	Positive(+)
2018-07-05	75844433	31	hpv31	Positive(+)
2018-07-05	22975439	40	hpv51	Positive(+)
2018-07-05	22975439	40	hpv58	Positive(+)
2018-07-05	79913444	39	hpv68	Positive(+)
2018-07-19	79919488	33	hpv51	Positive(+)
2018-07-19	79919488	33	hpv56	Positive(+)
2018-07-19	79919488	33	hpv66	Positive(+)
2018-07-19	79919488	33	hpv42	Positive(+)
2018-07-19	79919488	33	hpv61	Positive(+)
2018-07-19	61395494	52	hpv51	Positive(+)
2018-07-19	61395494	52	hpv61	Positive(+)
2018-07-19	83631495	49	hpv52	Positive(+)
2018-07-19	61660499	40	hpv56	Positive(+)
2018-07-19	57783516	55	hpv33	Positive(+)
2018-07-27	86057526	56	hpv39	Positive(+)
2018-07-27	69250533	42	hpv53	Positive(+)
2018-07-27	69250533	42	hpv43	Positive(+)
2018-07-27	85966539	42	hpv52	Positive(+)
2018-07-27	85966539	42	hpv81	Positive(+)
2018-07-27	86132542	43	hpv52	Positive(+)
2018-07-27	86120543	39	hpv55	Positive(+)
2018-07-27	69279550	53	hpv68	Positive(+)
2018-07-27	05304552	31	hpv52	Positive(+)
2018-08-01	89966578	36	hpv44	Positive(+)
2018-08-01	02042584	42	hpv16	Positive(+)
2018-08-01	89979585	44	hpv52	Positive(+)
2018-08-01	90059603	44	hpv61	Positive(+)
2018-08-01	90059603	44	hpv81	Positive(+)
2018-08-01	90026622	44	hpv58	Positive(+)
2018-08-01	90026622	44	hpv83	Positive(+)
2018-08-01	02041633	35	hpv35	Positive(+)
2018-08-01	88511645	61	hpv53	Positive(+)
2018-08-01	88398649	36	hpv66	Positive(+)
2018-08-03	81394655	32	hpv16	Positive(+)
2018-08-03	88368663	37	hpv61	Positive(+)
2018-08-03	88374674	53	hpv66	Positive(+)
2018-08-03	88404678	35	hpv45	Positive(+)
2018-08-03	90794682	40	hpv11	Positive(+)
2018-08-03	87432689	38	hpv16	Positive(+)
2018-08-03	87432689	38	hpv52	Positive(+)
2018-08-03	90745694	49	hpv45	Positive(+)
2018-08-03	90745694	49	hpv43	Positive(+)
2018-08-09	91280706	47	hpv44	Positive(+)
2018-08-09	90386728	61	hpv51	Positive(+)
2018-08-09	87533729	41	hpv53	Positive(+)
2018-08-09	87533729	41	hpv58	Positive(+)
2018-08-09	87533729	41	hpv43	Positive(+)
2018-08-09	88437732	36	hpv52	Positive(+)
2018-08-09	88353733	52	hpv06	Positive(+)
2018-08-09	92250743	32	hpv44	Positive(+)
2018-08-09	88442750	40	hpv52	Positive(+)
2018-08-09	92712751	66	hpv42	Positive(+)
2018-08-14	94398768	51	hpv51	Positive(+)
2018-08-14	95921773	38	hpv53	Positive(+)
2018-08-14	95921773	38	hpv56	Positive(+)
2018-08-14	89999790	30	hpv81	Positive(+)
2018-08-14	11209795	30	hpv58	Positive(+)
2018-08-14	90035797	38	hpv18	Positive(+)
2018-08-14	90035797	38	hpv45	Positive(+)
2018-08-14	90075808	43	hpv66	Positive(+)
2018-08-14	91992812	34	hpv18	Positive(+)
2018-08-14	91992812	34	hpv52	Positive(+)
2018-08-14	11205819	36	hpv66	Positive(+)
2018-08-14	91989820	41	hpv61	Positive(+)
2018-08-14	11216825	36	hpv45	Positive(+)
2018-08-14	90021829	31	hpv16	Positive(+)
2018-08-14	90043832	33	hpv52	Positive(+)
2018-08-17	72765848	31	hpv52	Positive(+)
2018-08-17	61598854	41	hpv51	Positive(+)
2018-08-17	61598854	41	hpv59	Positive(+)
2018-08-24	97010864	29	hpv45	Positive(+)
2018-08-24	90475879	35	hpv44	Positive(+)
2018-08-24	98149881	55	hpv61	Positive(+)
2018-08-31	99085889	35	hpv59	Positive(+)
2018-08-31	99070891	40	hpv68	Positive(+)
2018-08-31	98830894	48	hpv35	Positive(+)
2018-08-31	98830894	48	hpv58	Positive(+)
2018-08-31	98830894	48	hpv68	Positive(+)
2018-08-31	02791901	30	hpv16	Positive(+)
2018-09-06	61691910	40	hpv61	Positive(+)
2018-09-14	01446933	50	hpv52	Positive(+)
2018-09-14	03539938	53	hpv61	Positive(+)
2018-09-14	01480946	33	hpv06	Positive(+)
2018-09-14	01480946	33	hpv58	Positive(+)
2018-09-14	06911956	40	hpv35	Positive(+)
2018-09-14	10687963	35	hpv66	Positive(+)
2018-09-14	10687963	35	hpv43	Positive(+)
2018-09-14	06562973	40	hpv58	Positive(+)
2018-09-14	11130977	48	hpv39	Positive(+)
2018-09-14	11160982	40	hpv56	Positive(+)
2018-09-14	11219984	53	hpv53	Positive(+)
2018-09-14	11219984	53	hpv44	Positive(+)
2018-09-14	05054990	39	hpv52	Positive(+)
2018-09-14	05085993	48	hpv06	Positive(+)
2018-09-14	05085993	48	hpv31	Positive(+)
2018-09-14	20014997	32	hpv52	Positive(+)
2018-09-21	11190101	53	hpv45	Positive(+)
2018-09-21	11215111	51	hpv52	Positive(+)
2018-09-21	11215111	51	hpv61	Positive(+)
2018-09-21	05136116	51	hpv53	Positive(+)
2018-09-21	11607125	27	hpv52	Positive(+)
2018-09-21	11607125	27	hpv56	Positive(+)
2018-09-21	05122126	65	hpv61	Positive(+)
2018-09-21	13469133	35	hpv52	Positive(+)
2018-09-21	11410138	49	hpv51	Positive(+)
2018-09-21	11410138	49	hpv56	Positive(+)
2018-09-21	13453151	50	hpv16	Positive(+)
2018-09-21	13453151	50	hpv81	Positive(+)
2018-09-21	13629157	64	hpv16	Positive(+)
2018-09-21	13629157	64	hpv51	Positive(+)
2018-09-21	13629157	64	hpv59	Positive(+)
2018-09-21	13629157	64	hpv55	Positive(+)
2018-09-21	13629157	64	hpv61	Positive(+)
2018-09-21	14025158	50	hpv52	Positive(+)
2018-09-28	03870161	33	hpv61	Positive(+)
2018-09-28	14768163	39	hpv52	Positive(+)
2018-09-28	11171165	29	hpv59	Positive(+)
2018-09-28	12216166	62	hpv39	Positive(+)
2018-09-28	59334167	36	hpv51	Positive(+)
2018-09-28	59334167	36	hpv52	Positive(+)
2018-09-28	61564172	42	hpv59	Positive(+)
2018-09-28	06553174	27	hpv68	Positive(+)
2018-09-28	72733181	36	hpv06	Positive(+)
2018-09-28	72733181	36	hpv35	Positive(+)
2018-09-28	05222186	35	hpv59	Positive(+)
2018-09-28	72728190	37	hpv58	Positive(+)
2018-09-28	72674195	47	hpv59	Positive(+)
2018-10-12	14629196	39	hpv66	Positive(+)
2018-10-12	15410210	29	hpv16	Positive(+)
2018-10-12	61603217	37	hpv55	Positive(+)
2018-10-12	61705220	35	hpv81	Positive(+)
2018-10-12	16635226	33	hpv68	Positive(+)
2018-10-12	13485227	36	hpv52	Positive(+)
2018-10-12	17605245	50	hpv53	Positive(+)
2018-10-12	16464246	42	hpv51	Positive(+)
2018-10-16	16521256	30	hpv45	Positive(+)
2018-10-16	19075262	38	hpv42	Positive(+)
2018-10-16	19075262	38	hpv81	Positive(+)
2018-10-16	19130263	39	hpv16	Positive(+)
2018-10-16	18992270	29	hpv56	Positive(+)
2018-10-16	19038273	56	hpv58	Positive(+)
2018-10-19	91683274	54	hpv33	Positive(+)
2018-10-19	01950280	26	hpv82	Positive(+)
2018-10-19	01950280	26	hpv81	Positive(+)
2018-10-19	19280281	30	hpv44	Positive(+)
2018-10-19	19251283	36	hpv68	Positive(+)
2018-10-26	20720300	47	hpv59	Positive(+)
2018-10-26	13923331	48	hpv59	Positive(+)
2018-10-26	13923331	48	hpv66	Positive(+)
2018-10-30	07918335	35	hpv52	Positive(+)
2018-10-30	08032336	46	hpv61	Positive(+)
2018-10-30	08002337	32	hpv52	Positive(+)
2018-10-30	08002337	32	hpv68	Positive(+)
2018-10-30	90280340	44	hpv81	Positive(+)
2018-10-30	22573344	33	hpv45	Positive(+)
2018-10-30	23194346	34	hpv11	Positive(+)
2018-10-30	23194346	34	hpv83	Positive(+)
2018-10-30	07876349	44	hpv16	Positive(+)
2018-10-30	08037358	56	hpv61	Positive(+)
2018-10-30	07987373	55	hpv55	Positive(+)
2018-10-30	21262377	49	hpv52	Positive(+)
2018-10-30	07874389	37	hpv45	Positive(+)
2018-10-30	07946395	49	hpv52	Positive(+)
2018-10-30	07917401	43	hpv81	Positive(+)
2018-10-30	22557407	28	hpv55	Positive(+)
2018-10-30	22560408	39	hpv53	Positive(+)
2018-10-30	07890410	29	hpv68	Positive(+)
2018-11-02	23349426	49	hpv44	Positive(+)
2018-11-02	98433440	26	hpv16	Positive(+)
2018-11-06	25236454	18	hpv55	Positive(+)
2018-11-06	34241457	53	hpv52	Positive(+)
2018-11-06	25231463	28	hpv81	Positive(+)
2018-11-06	98603468	37	hpv52	Positive(+)
2018-11-06	07904485	31	hpv16	Positive(+)
2018-11-06	07904485	31	hpv52	Positive(+)
2018-11-06	07904485	31	hpv40	Positive(+)
2018-11-06	07990490	53	hpv56	Positive(+)
2018-11-06	08092520	63	hpv81	Positive(+)
2018-11-06	07916531	46	hpv42	Positive(+)
2018-11-06	08113542	60	hpv18	Positive(+)
2018-11-06	08113542	60	hpv33	Positive(+)
2018-11-09	26145546	50	hpv53	Positive(+)
2018-11-09	99693547	31	hpv51	Positive(+)
2018-11-09	25551549	25	hpv66	Positive(+)
2018-11-14	23348592	55	hpv66	Positive(+)
2018-11-14	23348592	55	hpv82	Positive(+)
2018-11-14	23348592	55	hpv81	Positive(+)
2018-11-14	22795600	31	hpv52	Positive(+)
2018-11-14	24654611	45	hpv55	Positive(+)
2018-11-14	24875613	53	hpv52	Positive(+)
2018-11-14	27860627	32	hpv51	Positive(+)
2018-11-14	27860627	32	hpv53	Positive(+)
2018-11-14	27860627	32	hpv43	Positive(+)
2018-11-14	23460628	42	hpv61	Positive(+)
2018-11-14	25416639	41	hpv06	Positive(+)
2018-11-14	25416639	41	hpv81	Positive(+)
2018-11-14	90346654	66	hpv16	Positive(+)
2018-11-19	29310655	31	hpv52	Positive(+)
2018-11-19	27529663	56	hpv52	Positive(+)
2018-11-19	27529663	56	hpv53	Positive(+)
2018-11-19	08007667	46	hpv58	Positive(+)
2018-11-19	25306675	48	hpv68	Positive(+)
2018-11-19	97110679	34	hpv16	Positive(+)
2018-11-19	15570680	35	hpv52	Positive(+)
2018-11-19	22797685	28	hpv51	Positive(+)
2018-11-19	22797685	28	hpv52	Positive(+)
2018-11-26	29595705	60	hpv52	Positive(+)
2018-11-26	20861714	51	hpv58	Positive(+)
2018-11-26	08043716	53	hpv53	Positive(+)
2018-11-26	08043716	53	hpv58	Positive(+)
2018-11-26	23344725	60	hpv81	Positive(+)
2018-11-26	23165731	49	hpv55	Positive(+)
2018-11-26	30354740	43	hpv16	Positive(+)
2018-11-26	23202747	39	hpv58	Positive(+)
2018-11-28	23271776	31	hpv39	Positive(+)
2018-11-28	31345778	43	hpv81	Positive(+)
2018-11-28	23179789	54	hpv51	Positive(+)
2018-11-28	23203793	49	hpv44	Positive(+)
2018-11-28	30447807	32	hpv06	Positive(+)
2018-11-28	30447807	32	hpv18	Positive(+)
2018-11-28	94540811	63	hpv61	Positive(+)
2018-11-28	94412813	47	hpv52	Positive(+)
2018-11-28	94350816	51	hpv61	Positive(+)
2018-11-28	94479825	51	hpv53	Positive(+)
2018-11-28	94472843	41	hpv53	Positive(+)
2018-11-28	94472843	41	hpv43	Positive(+)
2018-11-28	94485846	40	hpv16	Positive(+)
2018-11-28	94466858	43	hpv61	Positive(+)
2018-11-30	30709862	34	hpv53	Positive(+)
2018-11-30	30709862	34	hpv58	Positive(+)
2018-11-30	94353871	55	hpv81	Positive(+)
2018-11-30	94454876	45	hpv51	Positive(+)
2018-11-30	30659878	30	hpv59	Positive(+)
2018-11-30	94340886	38	hpv58	Positive(+)
2018-11-30	94534902	55	hpv56	Positive(+)
2018-11-30	97824905	43	hpv52	Positive(+)
2018-11-30	97826907	44	hpv58	Positive(+)
2018-11-30	97825908	51	hpv53	Positive(+)
2018-11-30	97825908	51	hpv44	Positive(+)
2018-11-30	31727910	51	hpv43	Positive(+)
2018-11-30	31738913	40	hpv59	Positive(+)
2018-11-30	31029914	36	hpv18	Positive(+)
2018-12-07	31661930	32	hpv58	Positive(+)
2018-12-07	90046969	31	hpv82	Positive(+)
2018-12-07	33200990	37	hpv52	Positive(+)
2018-12-07	36375999	24	hpv35	Positive(+)
2018-12-07	36375999	24	hpv56	Positive(+)
2018-12-07	36375999	24	hpv66	Positive(+)
2018-12-07	36375999	24	hpv68	Positive(+)
2018-12-07	36375999	24	hpv83	Positive(+)
2018-12-07	97106006	38	hpv59	Positive(+)
2018-12-14	32992011	54	hpv53	Positive(+)
2018-12-14	32992011	54	hpv61	Positive(+)
2018-12-14	37808022	39	hpv33	Positive(+)
2018-12-14	36762026	44	hpv81	Positive(+)
2018-12-14	92839034	52	hpv59	Positive(+)
2018-12-14	44446046	40	hpv58	Positive(+)
2018-12-14	02079049	37	hpv59	Positive(+)
2018-12-14	94934056	49	hpv18	Positive(+)
2018-12-14	02092066	65	hpv52	Positive(+)
2018-12-14	27816071	33	hpv58	Positive(+)
2018-12-21	02067104	43	hpv52	Positive(+)
2018-12-21	39615106	33	hpv68	Positive(+)
2018-12-21	38080108	54	hpv31	Positive(+)
2018-12-21	38080108	54	hpv51	Positive(+)
2018-12-21	38080108	54	hpv40	Positive(+)
2018-12-21	39889116	45	hpv58	Positive(+)
2018-12-21	39889116	45	hpv42	Positive(+)
2018-12-26	40185120	52	hpv58	Positive(+)
2018-12-26	14347121	29	hpv35	Positive(+)
2018-12-26	36753122	58	hpv82	Positive(+)
2018-12-26	13902124	41	hpv45	Positive(+)
2018-12-26	14423125	39	hpv56	Positive(+)
2018-12-26	19743138	41	hpv39	Positive(+)
2018-12-26	13877142	51	hpv18	Positive(+)
2018-12-26	13877142	51	hpv53	Positive(+)
2018-12-26	14235144	49	hpv81	Positive(+)
2018-12-26	14381146	42	hpv45	Positive(+)
2018-12-26	14366148	46	hpv66	Positive(+)
2018-12-26	14366148	46	hpv61	Positive(+)
2018-12-26	13869154	54	hpv53	Positive(+)
2018-12-26	13869154	54	hpv66	Positive(+)
2018-12-26	13870165	43	hpv16	Positive(+)
2018-12-26	13870165	43	hpv66	Positive(+)
2018-12-26	40340169	34	hpv52	Positive(+)
2018-12-26	40340169	34	hpv58	Positive(+)
2018-12-26	13937177	50	hpv61	Positive(+)
2018-12-26	13930183	40	hpv58	Positive(+)
2018-12-26	14384192	39	hpv81	Positive(+)
2018-12-28	36755206	59	hpv61	Positive(+)
2018-12-28	13855208	43	hpv59	Positive(+)
2018-12-28	14200213	44	hpv52	Positive(+)
2018-12-28	14200213	44	hpv81	Positive(+)
2018-12-28	40604214	53	hpv45	Positive(+)
2018-12-28	13896225	45	hpv52	Positive(+)
2018-12-28	14185237	53	hpv53	Positive(+)
2018-12-28	14185237	53	hpv81	Positive(+)
2018-12-28	14362241	50	hpv35	Positive(+)
2018-12-28	14362241	50	hpv59	Positive(+)
2019-01-04	41170244	62	hpv52	Positive(+)
2019-01-04	40166247	42	hpv16	Positive(+)
2019-01-04	41358255	24	hpv52	Positive(+)
2019-01-04	41358255	24	hpv82	Positive(+)
2019-01-04	61503259	32	hpv33	Positive(+)
2019-01-04	61503259	32	hpv40	Positive(+)
2019-01-10	41446266	54	hpv44	Positive(+)
2019-01-10	13874267	44	hpv52	Positive(+)
2019-01-10	68630276	28	hpv51	Positive(+)
2019-01-10	68630276	28	hpv66	Positive(+)
2019-01-10	86646278	57	hpv81	Positive(+)
2019-01-10	41821279	32	hpv59	Positive(+)
2019-01-10	41821279	32	hpv43	Positive(+)
2019-01-10	41821279	32	hpv81	Positive(+)
2019-01-10	14253286	38	hpv16	Positive(+)
2019-01-10	14253286	38	hpv53	Positive(+)
2019-01-10	14253286	38	hpv40	Positive(+)
2019-01-10	41733288	38	hpv53	Positive(+)
2019-01-10	41733288	38	hpv61	Positive(+)
2019-01-21	10898292	41	hpv16	Positive(+)
2019-01-21	14254296	30	hpv53	Positive(+)
2019-01-21	43162298	45	hpv16	Positive(+)
2019-01-21	43162298	45	hpv18	Positive(+)
2019-01-21	36288301	29	hpv66	Positive(+)
2019-01-21	43032303	55	hpv42	Positive(+)
2019-01-25	43908306	27	hpv52	Positive(+)
2019-01-25	43968321	28	hpv16	Positive(+)
2019-02-01	44623325	52	hpv16	Positive(+)
2019-02-01	44206331	49	hpv16	Positive(+)
2019-02-01	44206331	49	hpv59	Positive(+)
2019-02-01	44206331	49	hpv61	Positive(+)
2019-02-01	32062334	51	hpv66	Positive(+)
2019-02-15	44991335	48	hpv56	Positive(+)
2019-02-15	44735337	45	hpv35	Positive(+)
2019-02-15	45028341	48	hpv16	Positive(+)
2019-02-15	45028341	48	hpv53	Positive(+)
2019-02-15	45028341	48	hpv61	Positive(+)
2019-02-15	39904344	53	hpv44	Positive(+)
2019-02-22	45354361	50	hpv53	Positive(+)
2019-02-22	45370363	54	hpv16	Positive(+)
2019-02-22	45761366	56	hpv56	Positive(+)
2019-02-22	45761366	56	hpv43	Positive(+)
2019-02-22	45824368	27	hpv52	Positive(+)
2019-02-22	15371369	52	hpv43	Positive(+)
2019-03-01	46724379	33	hpv45	Positive(+)
2019-03-01	35626384	56	hpv18	Positive(+)
2019-03-01	46908390	28	hpv06	Positive(+)
2019-03-01	46908390	28	hpv16	Positive(+)
2019-03-01	46937396	35	hpv39	Positive(+)
2019-03-07	47590418	51	hpv52	Positive(+)
2019-03-07	47590418	51	hpv56	Positive(+)
2019-03-07	47590418	51	hpv81	Positive(+)
2019-03-07	48522429	38	hpv40	Positive(+)
2019-03-18	16418432	55	hpv66	Positive(+)
2019-03-18	49122457	37	hpv52	Positive(+)
2019-03-18	49221458	32	hpv58	Positive(+)
2019-03-18	49221458	32	hpv42	Positive(+)
2019-03-18	39104468	35	hpv56	Positive(+)
2019-03-18	39104468	35	hpv42	Positive(+)
2019-03-18	49293472	52	hpv44	Positive(+)
2019-03-18	28415493	35	hpv61	Positive(+)
2019-03-18	49740510	55	hpv59	Positive(+)
2019-03-22	13306525	43	hpv81	Positive(+)
2019-03-22	50665537	53	hpv35	Positive(+)
2019-03-22	13307540	45	hpv51	Positive(+)
2019-03-22	16533544	36	hpv61	Positive(+)
2019-03-22	50908549	30	hpv06	Positive(+)
2019-03-22	28407554	30	hpv52	Positive(+)
2019-03-29	64564560	45	hpv55	Positive(+)
2019-03-29	16429561	49	hpv43	Positive(+)
2019-03-29	51411567	45	hpv16	Positive(+)
2019-03-29	51457574	52	hpv44	Positive(+)
2019-03-29	31581581	39	hpv33	Positive(+)
2019-03-29	31581581	39	hpv42	Positive(+)
2019-03-29	31581581	39	hpv81	Positive(+)
2019-03-29	53545586	49	hpv68	Positive(+)
2019-03-29	53549590	52	hpv40	Positive(+)
2019-03-29	53844599	44	hpv39	Positive(+)
2019-04-04	41056609	32	hpv16	Positive(+)
2019-04-04	55185611	34	hpv45	Positive(+)
2019-04-04	55185611	34	hpv52	Positive(+)
2019-04-04	16450612	48	hpv18	Positive(+)
2019-04-04	16450612	48	hpv43	Positive(+)
2019-04-04	16450612	48	hpv61	Positive(+)
2019-04-04	54793617	61	hpv66	Positive(+)
2019-04-12	39908632	45	hpv52	Positive(+)
2019-04-12	41552637	57	hpv52	Positive(+)
2019-04-12	57407655	51	hpv81	Positive(+)
2019-04-12	56867656	43	hpv53	Positive(+)
2019-04-19	58027681	53	hpv61	Positive(+)
2019-04-19	55216687	40	hpv16	Positive(+)
2019-04-19	58082696	51	hpv52	Positive(+)
2019-04-26	08112716	56	hpv43	Positive(+)
2019-04-26	08052719	64	hpv16	Positive(+)
2019-04-26	08052719	64	hpv44	Positive(+)
2019-04-26	08052719	64	hpv81	Positive(+)
2019-04-26	53226737	39	hpv61	Positive(+)
2019-04-26	60900765	45	hpv61	Positive(+)
2019-05-10	60901773	44	hpv61	Positive(+)
2019-05-10	59034788	53	hpv61	Positive(+)
2019-05-10	62399803	46	hpv18	Positive(+)
2019-05-10	63983815	45	hpv55	Positive(+)
2019-05-17	64518825	55	hpv31	Positive(+)
2019-05-17	64533826	46	hpv53	Positive(+)
2019-05-17	62639842	39	hpv58	Positive(+)
2019-05-17	65071844	43	hpv68	Positive(+)
2019-05-17	65305850	44	hpv68	Positive(+)
2019-05-17	64708863	41	hpv81	Positive(+)
2019-05-17	16267864	40	hpv59	Positive(+)
2019-05-17	52087869	60	hpv06	Positive(+)
2019-05-24	52034883	34	hpv66	Positive(+)
2019-05-24	70608896	35	hpv66	Positive(+)
2019-05-24	70608896	35	hpv43	Positive(+)
2019-05-24	70608896	35	hpv55	Positive(+)
2019-05-24	65270898	38	hpv52	Positive(+)
2019-05-24	68588900	29	hpv39	Positive(+)
2019-05-24	68588900	29	hpv53	Positive(+)
2019-05-24	68588900	29	hpv68	Positive(+)
2019-05-24	55217905	38	hpv53	Positive(+)
2019-05-24	55217905	38	hpv58	Positive(+)
2019-05-24	55217905	38	hpv44	Positive(+)
2019-05-24	55213916	54	hpv44	Positive(+)
2019-05-24	55218917	36	hpv16	Positive(+)
2019-05-24	55217940	50	hpv56	Positive(+)
2019-05-24	55217940	50	hpv68	Positive(+)
2019-05-24	55220944	25	hpv42	Positive(+)
2019-05-24	55229945	43	hpv44	Positive(+)
2019-05-24	55235947	27	hpv55	Positive(+)
2019-05-24	55235947	27	hpv81	Positive(+)
2019-05-31	71288964	58	hpv68	Positive(+)
2019-05-31	71288964	58	hpv83	Positive(+)
2019-05-31	05258965	48	hpv53	Positive(+)
2019-05-31	65436969	32	hpv43	Positive(+)
2019-05-31	29286971	38	hpv52	Positive(+)
2019-05-31	10763973	60	hpv18	Positive(+)
2019-05-31	10763973	60	hpv51	Positive(+)
2019-05-31	10763973	60	hpv53	Positive(+)
2019-05-31	10763973	60	hpv61	Positive(+)
2019-05-31	10763973	60	hpv81	Positive(+)
2019-05-31	43019988	46	hpv82	Positive(+)
2019-05-31	73569995	51	hpv58	Positive(+)
2019-05-31	27751996	34	hpv39	Positive(+)
2019-05-31	54788998	45	hpv18	Positive(+)
2019-05-31	54788998	45	hpv33	Positive(+)
2019-05-31	25492000	51	hpv16	Positive(+)
2019-05-31	25492000	51	hpv56	Positive(+)
2019-06-06	25494001	60	hpv58	Positive(+)
2019-06-06	25495008	55	hpv53	Positive(+)
2019-06-06	25495008	55	hpv58	Positive(+)
2019-06-06	25495008	55	hpv59	Positive(+)
2019-06-06	25497015	43	hpv51	Positive(+)
2019-06-06	25499016	31	hpv55	Positive(+)
2019-06-06	25494021	37	hpv56	Positive(+)
2019-06-06	25494021	37	hpv43	Positive(+)
2019-06-06	25501026	36	hpv39	Positive(+)
2019-06-06	25503036	36	hpv39	Positive(+)
2019-06-06	25503036	36	hpv59	Positive(+)
2019-06-06	25503036	36	hpv82	Positive(+)
2019-06-06	25512041	40	hpv16	Positive(+)
2019-06-14	25512048	43	hpv56	Positive(+)
2019-06-14	16085059	48	hpv44	Positive(+)
2019-06-14	16087077	49	hpv61	Positive(+)
2019-06-14	16082082	40	hpv51	Positive(+)
2019-06-14	16082082	40	hpv52	Positive(+)
2019-06-14	16082082	40	hpv16	Positive(+)
2019-06-21	16077087	33	hpv56	Positive(+)
2019-06-21	16079089	31	hpv55	Positive(+)
2019-06-21	16079089	31	hpv16	Positive(+)
2019-06-21	16097097	32	hpv16	Positive(+)
2019-06-21	16089098	36	hpv16	Positive(+)
2019-06-21	43111102	30	hpv43	Positive(+)
2019-06-21	43131103	39	hpv31	Positive(+)
2019-06-21	43131103	39	hpv43	Positive(+)
2019-06-21	43135105	30	hpv52	Positive(+)
2019-06-21	43135105	30	hpv66	Positive(+)
2019-06-21	43236106	48	hpv83	Positive(+)
2019-06-21	43238108	35	hpv53	Positive(+)
2019-06-21	43239126	33	hpv44	Positive(+)
2019-06-21	43226129	36	hpv16	Positive(+)
2019-06-21	43246136	44	hpv52	Positive(+)
2019-06-21	43247137	31	hpv53	Positive(+)
2019-06-21	43250140	50	hpv16	Positive(+)
2019-06-21	82721143	30	hpv82	Positive(+)
2019-06-21	82723144	43	hpv52	Positive(+)
2019-06-21	82723144	43	hpv42	Positive(+)
2019-06-21	82726147	33	hpv66	Positive(+)
2019-06-21	82726147	33	hpv43	Positive(+)
2019-06-21	82728149	32	hpv39	Positive(+)
2019-06-21	82732153	32	hpv35	Positive(+)
2019-06-21	82733154	32	hpv53	Positive(+)
2019-06-21	82736167	49	hpv51	Positive(+)
2019-06-21	82741172	48	hpv42	Positive(+)
2019-06-21	82743174	58	hpv16	Positive(+)
2019-06-21	82744175	52	hpv16	Positive(+)
2019-06-21	82752183	37	hpv81	Positive(+)
2019-06-21	82763204	38	hpv53	Positive(+)
2019-06-28	81215170	25	hpv81	Positive(+)
2019-06-28	81217208	50	hpv16	Positive(+)
2019-06-28	81217208	50	hpv18	Positive(+)
2019-06-28	81217208	50	hpv66	Positive(+)
2019-06-28	81221212	36	hpv16	Positive(+)
2019-06-28	81226217	45	hpv61	Positive(+)
2019-06-28	81228219	48	hpv31	Positive(+)
2019-06-28	81228219	48	hpv61	Positive(+)
2019-06-28	81228219	48	hpv81	Positive(+)
2019-06-28	81230221	63	hpv18	Positive(+)
2019-06-28	81234225	48	hpv18	Positive(+)
2019-06-28	81234225	48	hpv16	Positive(+)
2019-06-28	81239240	31	hpv59	Positive(+)
2019-06-28	81237247	42	hpv61	Positive(+)
2019-06-28	81233255	36	hpv18	Positive(+)
2019-06-28	81233255	36	hpv35	Positive(+)
2019-06-28	81233255	36	hpv66	Positive(+)
2019-06-28	81246258	32	hpv66	Positive(+)
2019-06-28	81240261	33	hpv56	Positive(+)
2019-06-28	81243264	34	hpv31	Positive(+)
2019-06-28	31154265	39	hpv31	Positive(+)
2019-06-28	31152273	42	hpv11	Positive(+)
2019-06-28	31155276	50	hpv61	Positive(+)
2019-06-28	31156277	42	hpv16	Positive(+)
2019-06-28	31157278	47	hpv52	Positive(+)
2019-06-28	31158279	40	hpv52	Positive(+)
2019-06-28	31158279	40	hpv81	Positive(+)
2019-07-05	31163294	39	hpv81	Positive(+)
2019-07-05	31166307	75	hpv39	Positive(+)
2019-07-05	31166307	75	hpv58	Positive(+)
2019-07-05	31166307	75	hpv68	Positive(+)
2019-07-05	31166307	75	hpv43	Positive(+)
2019-07-05	31162313	56	hpv58	Positive(+)
2019-07-05	31175317	59	hpv43	Positive(+)
2019-07-05	31180321	46	hpv18	Positive(+)
2019-07-05	31180321	46	hpv81	Positive(+)
2019-07-05	66186327	37	hpv66	Positive(+)
2019-07-05	66186327	37	hpv43	Positive(+)
2019-07-05	66136346	33	hpv18	Positive(+)
2019-07-05	66136346	33	hpv16	Positive(+)
2019-07-05	66137348	54	hpv55	Positive(+)
2019-07-05	66137348	54	hpv83	Positive(+)
2019-07-05	66137348	54	hpv42	Positive(+)
2019-07-05	66146357	34	hpv31	Positive(+)
2019-07-05	66146357	34	hpv52	Positive(+)
2019-07-05	66146357	34	hpv81	Positive(+)
2019-07-05	66149360	31	hpv55	Positive(+)
2019-07-05	66149360	31	hpv83	Positive(+)
2019-07-11	66147368	40	hpv53	Positive(+)
2019-07-11	66147368	40	hpv44	Positive(+)
2019-07-11	66148369	30	hpv18	Positive(+)
2019-07-11	66149370	28	hpv68	Positive(+)
2019-07-11	66151372	50	hpv16	Positive(+)
2019-07-11	66155376	29	hpv52	Positive(+)
2019-07-11	66155376	29	hpv56	Positive(+)
2019-07-11	66152383	30	hpv44	Positive(+)
2019-07-11	66161392	40	hpv81	Positive(+)
2019-07-11	66163394	30	hpv16	Positive(+)
2019-07-11	66166397	59	hpv45	Positive(+)
2019-07-11	66166397	59	hpv61	Positive(+)
2019-07-11	66176417	55	hpv39	Positive(+)
2019-07-11	66176417	55	hpv52	Positive(+)
2019-07-19	66174435	43	hpv61	Positive(+)
2019-07-19	66177438	44	hpv61	Positive(+)
2019-07-19	66131442	55	hpv35	Positive(+)
2019-07-19	66131442	55	hpv58	Positive(+)
2019-07-19	66135446	46	hpv16	Positive(+)
2019-07-19	66137448	42	hpv35	Positive(+)
2019-07-19	66130451	48	hpv52	Positive(+)
2019-07-19	66124455	40	hpv35	Positive(+)
2019-07-26	66128459	33	hpv39	Positive(+)
2019-07-26	66128459	33	hpv52	Positive(+)
2019-07-26	66122493	39	hpv55	Positive(+)
2019-07-26	66126497	52	hpv16	Positive(+)
2019-07-26	66127498	49	hpv31	Positive(+)
2019-07-26	66127498	49	hpv33	Positive(+)
2019-07-26	51141502	56	hpv51	Positive(+)
2019-07-26	51141502	56	hpv59	Positive(+)
2019-07-26	51145506	56	hpv56	Positive(+)
2019-07-26	51145506	56	hpv66	Positive(+)
2019-07-26	51145506	56	hpv55	Positive(+)
2019-08-01	51143524	33	hpv51	Positive(+)
2019-08-01	51143524	33	hpv16	Positive(+)
2019-08-01	51145526	60	hpv53	Positive(+)
2019-08-01	51146537	40	hpv56	Positive(+)
2019-08-08	51147548	44	hpv18	Positive(+)
2019-08-08	51147548	44	hpv16	Positive(+)
2019-08-08	51160551	42	hpv18	Positive(+)
2019-08-08	51163554	45	hpv18	Positive(+)
2019-08-08	51168559	66	hpv52	Positive(+)
2019-08-08	51168559	66	hpv44	Positive(+)
2019-08-08	51168559	66	hpv16	Positive(+)
2019-08-08	51169560	37	hpv33	Positive(+)
2019-08-08	51130561	32	hpv53	Positive(+)
2019-08-08	51130561	32	hpv68	Positive(+)
2019-08-08	51130561	32	hpv16	Positive(+)
2019-08-08	51131562	49	hpv81	Positive(+)
2019-08-08	51136567	36	hpv66	Positive(+)
2019-08-08	51137568	48	hpv16	Positive(+)
2019-08-08	18211572	51	hpv18	Positive(+)
2019-08-08	18210581	51	hpv61	Positive(+)
2019-08-08	18212582	44	hpv58	Positive(+)
2019-08-16	18229600	33	hpv16	Positive(+)
2019-08-16	18232601	47	hpv52	Positive(+)
2019-08-16	18235603	41	hpv68	Positive(+)
2019-08-16	18235603	41	hpv81	Positive(+)
2019-08-16	18235603	41	hpv16	Positive(+)
2019-08-16	18233604	55	hpv33	Positive(+)
2019-08-16	18233604	55	hpv53	Positive(+)
2019-08-16	18233604	55	hpv58	Positive(+)
2019-08-16	18233604	55	hpv16	Positive(+)
2019-08-16	18245606	49	hpv55	Positive(+)
2019-08-16	18246607	33	hpv16	Positive(+)
2019-08-16	18271611	47	hpv61	Positive(+)
2019-08-16	18274615	49	hpv18	Positive(+)
2019-08-16	18277618	36	hpv18	Positive(+)
2019-08-16	18281622	30	hpv51	Positive(+)
2019-08-23	18284631	34	hpv26	Positive(+)
2019-08-23	18284631	34	hpv44	Positive(+)
2019-08-23	18283634	48	hpv51	Positive(+)
2019-08-23	18283634	48	hpv53	Positive(+)
2019-08-23	18288639	45	hpv59	Positive(+)
2019-08-23	18291642	45	hpv39	Positive(+)
2019-08-23	18291642	45	hpv59	Positive(+)
2019-08-23	18292663	31	hpv81	Positive(+)
2019-08-30	18294675	42	hpv52	Positive(+)
2019-08-30	18298679	35	hpv55	Positive(+)
2019-08-30	18299680	36	hpv06	Positive(+)
2019-08-30	18299680	36	hpv53	Positive(+)
2019-08-30	43267696	41	hpv66	Positive(+)
2019-08-30	43266697	50	hpv31	Positive(+)
2019-08-30	43209710	54	hpv59	Positive(+)
2019-08-30	43217718	40	hpv52	Positive(+)
2019-08-30	43217718	40	hpv43	Positive(+)
2019-08-30	43217718	40	hpv44	Positive(+)
2019-08-30	43219720	27	hpv52	Positive(+)
2019-08-30	43218729	42	hpv61	Positive(+)
2019-08-30	43237749	49	hpv53	Positive(+)
2019-08-30	43239750	42	hpv61	Positive(+)
2019-08-30	43241752	53	hpv82	Positive(+)
2019-08-30	43244765	61	hpv39	Positive(+)
2019-08-30	43248769	50	hpv39	Positive(+)
2019-09-04	43243764	51	hpv53	Positive(+)
2019-09-04	43243764	51	hpv81	Positive(+)
2019-09-04	43240771	47	hpv81	Positive(+)
2019-09-04	43245776	31	hpv16	Positive(+)
2019-09-04	43245776	31	hpv44	Positive(+)
2019-09-04	43279780	57	hpv18	Positive(+)
2019-09-04	43279780	57	hpv61	Positive(+)
2019-09-04	43277788	27	hpv18	Positive(+)
2019-09-04	83124805	47	hpv83	Positive(+)
2019-09-04	83126807	51	hpv66	Positive(+)
2019-09-04	83127808	49	hpv18	Positive(+)
2019-09-04	83127808	49	hpv42	Positive(+)
2019-09-04	83120811	38	hpv51	Positive(+)
2019-09-04	83137828	43	hpv52	Positive(+)
2019-09-04	83135831	54	hpv52	Positive(+)
2019-09-04	83133844	33	hpv59	Positive(+)
2019-09-04	83136857	51	hpv35	Positive(+)
2019-09-04	83136857	51	hpv55	Positive(+)
2019-09-04	83136857	51	hpv83	Positive(+)
2019-09-04	83137858	38	hpv52	Positive(+)
2019-09-05	83144875	33	hpv58	Positive(+)
2019-09-05	83145886	36	hpv51	Positive(+)
2019-09-05	83146897	49	hpv53	Positive(+)
2019-09-05	83154925	49	hpv52	Positive(+)
2019-09-05	83155936	50	hpv61	Positive(+)
2019-09-05	83157948	51	hpv52	Positive(+)
2019-09-06	83151002	43	hpv16	Positive(+)
2019-09-06	83162013	34	hpv45	Positive(+)
2019-09-06	83113014	37	hpv45	Positive(+)
2019-09-06	83118019	50	hpv52	Positive(+)
2019-09-06	83190021	43	hpv68	Positive(+)
2019-09-06	83198029	40	hpv16	Positive(+)
2019-09-06	83198029	40	hpv66	Positive(+)
2019-09-06	68352031	42	hpv52	Positive(+)
2019-09-06	68352031	42	hpv68	Positive(+)
2019-09-06	68353041	72	hpv52	Positive(+)
2019-09-06	68356042	35	hpv53	Positive(+)
2019-09-06	68355046	33	hpv45	Positive(+)
2019-09-06	68358049	50	hpv31	Positive(+)
2019-09-06	68374050	31	hpv55	Positive(+)
2019-09-06	68372051	31	hpv52	Positive(+)
2019-09-06	33261054	33	hpv18	Positive(+)
2019-09-06	33261054	33	hpv33	Positive(+)
2019-09-06	33264055	52	hpv16	Positive(+)
2019-09-06	33268059	29	hpv39	Positive(+)
2019-09-06	33240069	47	hpv68	Positive(+)
2019-09-06	33235806	45	hpv06	Positive(+)
2019-09-06	33235806	45	hpv66	Positive(+)
2019-09-06	33238939	30	hpv31	Positive(+)
2019-09-06	33231942	47	hpv52	Positive(+)
2019-09-06	33237958	49	hpv43	Positive(+)
2019-09-06	33258959	31	hpv43	Positive(+)
2019-09-06	33254965	44	hpv52	Positive(+)
2019-09-06	33257968	34	hpv53	Positive(+)
2019-09-06	33257968	34	hpv59	Positive(+)
2019-09-06	33257968	34	hpv11	Positive(+)
2019-09-06	33253974	31	hpv53	Positive(+)
2019-09-06	33253974	31	hpv43	Positive(+)
2019-09-06	33255986	30	hpv58	Positive(+)
2019-09-12	33259080	44	hpv59	Positive(+)
2019-09-12	33251082	63	hpv58	Positive(+)
2019-09-12	33282090	34	hpv56	Positive(+)
2019-09-12	33284095	33	hpv81	Positive(+)
2019-09-12	33283104	37	hpv18	Positive(+)
2019-09-12	33281112	46	hpv45	Positive(+)
2019-09-12	42122113	61	hpv42	Positive(+)
2019-09-12	42122113	61	hpv61	Positive(+)
2019-09-12	42121122	33	hpv68	Positive(+)
2019-09-12	42132123	56	hpv52	Positive(+)
2019-09-12	42132123	56	hpv82	Positive(+)
2019-09-12	42138129	51	hpv39	Positive(+)
2019-09-12	42133134	48	hpv52	Positive(+)
2019-09-12	42135136	55	hpv45	Positive(+)
2019-09-12	42138139	39	hpv81	Positive(+)
2019-09-12	42143144	65	hpv45	Positive(+)
2019-09-12	42147148	42	hpv16	Positive(+)
2019-09-12	42141152	37	hpv45	Positive(+)
2019-09-12	42150161	55	hpv81	Positive(+)
2019-09-12	42151162	47	hpv42	Positive(+)
2019-09-12	42152163	26	hpv45	Positive(+)
2019-09-12	42161171	40	hpv16	Positive(+)
2019-09-20	42165176	38	hpv45	Positive(+)
2019-09-20	42168179	51	hpv06	Positive(+)
2019-09-20	42168179	51	hpv58	Positive(+)
2019-09-20	42160181	37	hpv61	Positive(+)
2019-09-20	42169190	52	hpv16	Positive(+)
2019-09-20	42169190	52	hpv35	Positive(+)
2019-09-20	42163194	56	hpv52	Positive(+)
2019-09-20	42166197	56	hpv06	Positive(+)
2019-09-20	42166197	56	hpv55	Positive(+)
2019-09-20	42175216	32	hpv16	Positive(+)
2019-09-20	42176217	33	hpv45	Positive(+)
2019-09-20	42176217	33	hpv81	Positive(+)
2019-09-20	42181232	47	hpv56	Positive(+)
2019-09-20	42181232	47	hpv58	Positive(+)
2019-09-20	42181232	47	hpv61	Positive(+)
2019-09-20	42189240	47	hpv45	Positive(+)
2019-09-20	42183244	56	hpv66	Positive(+)
2019-09-27	42189250	27	hpv16	Positive(+)
2019-09-27	42189250	27	hpv33	Positive(+)
2019-09-27	42189250	27	hpv39	Positive(+)
2019-09-27	42189250	27	hpv68	Positive(+)
2019-09-27	42187258	52	hpv16	Positive(+)
2019-09-27	42186267	44	hpv35	Positive(+)
2019-09-27	42197268	44	hpv81	Positive(+)
2019-09-27	42190270	49	hpv61	Positive(+)
2019-09-27	42194275	25	hpv53	Positive(+)
2019-09-27	59342282	31	hpv68	Positive(+)
2019-09-27	59345286	31	hpv43	Positive(+)
2019-09-27	59332293	39	hpv59	Positive(+)
2019-09-27	59338299	47	hpv45	Positive(+)
2019-09-27	59339310	32	hpv43	Positive(+)
2019-09-27	59326320	50	hpv18	Positive(+)
2019-09-27	59326320	50	hpv51	Positive(+)
2019-09-27	59326320	50	hpv56	Positive(+)
2019-09-27	59326320	50	hpv61	Positive(+)
2019-09-27	59327321	51	hpv59	Positive(+)
2019-09-27	59327321	51	hpv66	Positive(+)
2019-09-27	59442323	41	hpv45	Positive(+)
2019-09-27	59443334	37	hpv52	Positive(+)
2019-09-27	59444335	47	hpv45	Positive(+)
2019-09-27	59447338	41	hpv45	Positive(+)
2019-09-27	59447338	41	hpv56	Positive(+)
2019-09-27	59448339	32	hpv45	Positive(+)
2019-09-27	59481342	30	hpv44	Positive(+)
2019-09-27	59484345	48	hpv56	Positive(+)
2019-09-27	59484345	48	hpv81	Positive(+)
2019-09-27	59487348	66	hpv53	Positive(+)
2019-09-27	53486358	41	hpv53	Positive(+)
2019-09-27	53480361	59	hpv35	Positive(+)
2019-09-27	53480361	59	hpv53	Positive(+)
2019-09-27	53480361	59	hpv81	Positive(+)
2019-10-11	53485378	41	hpv81	Positive(+)
2019-10-11	53482387	51	hpv18	Positive(+)
2019-10-11	53477398	42	hpv45	Positive(+)
2019-10-11	53478399	33	hpv52	Positive(+)
2019-10-11	53467408	39	hpv52	Positive(+)
2019-10-11	53460411	36	hpv18	Positive(+)
2019-10-11	53461412	43	hpv52	Positive(+)
2019-10-11	53459421	30	hpv45	Positive(+)
2019-10-11	53457431	51	hpv55	Positive(+)
2019-10-11	53454432	32	hpv31	Positive(+)
2019-10-11	53454432	32	hpv39	Positive(+)
2019-10-11	53454432	32	hpv53	Positive(+)
2019-10-11	53452435	50	hpv45	Positive(+)
2019-10-17	53451392	56	hpv53	Positive(+)
2019-10-17	53447448	56	hpv81	Positive(+)
2019-10-17	53432451	37	hpv53	Positive(+)
2019-10-17	53434455	52	hpv16	Positive(+)
2019-10-17	53438459	46	hpv52	Positive(+)
2019-10-17	53438459	46	hpv58	Positive(+)
2019-10-17	53438459	46	hpv59	Positive(+)
2019-10-17	53434469	35	hpv58	Positive(+)
2019-10-17	53431472	43	hpv06	Positive(+)
2019-10-17	53431472	43	hpv16	Positive(+)
2019-10-17	53427486	63	hpv45	Positive(+)
2019-10-17	53428491	46	hpv59	Positive(+)
2019-10-17	53429498	38	hpv43	Positive(+)
2019-10-17	53425499	41	hpv45	Positive(+)
2019-10-24	53423500	47	hpv45	Positive(+)
2019-10-24	53422503	36	hpv83	Positive(+)
2019-10-24	53417506	56	hpv52	Positive(+)
2019-10-24	53419520	58	hpv35	Positive(+)
2019-10-24	53419520	58	hpv59	Positive(+)
2019-10-24	53417540	55	hpv51	Positive(+)
2019-10-24	53417540	55	hpv58	Positive(+)
2019-10-24	53418541	38	hpv61	Positive(+)
2019-10-24	53415544	43	hpv55	Positive(+)
2019-10-24	53413555	35	hpv06	Positive(+)
2019-10-24	53414560	37	hpv52	Positive(+)
2019-10-24	45611562	30	hpv45	Positive(+)
2019-10-24	45611562	30	hpv68	Positive(+)
2019-10-24	45611562	30	hpv81	Positive(+)
2019-10-24	45612573	51	hpv39	Positive(+)
2019-10-24	45612573	51	hpv52	Positive(+)
2019-10-24	45612573	51	hpv68	Positive(+)
2019-10-24	45614575	31	hpv66	Positive(+)
2019-10-24	45616577	43	hpv59	Positive(+)
2019-10-24	45619581	43	hpv56	Positive(+)
2019-10-24	45623585	50	hpv53	Positive(+)
2019-10-31	45627588	42	hpv68	Positive(+)
2019-10-31	45630591	51	hpv39	Positive(+)
2019-10-31	45630591	51	hpv61	Positive(+)
2019-10-31	45630591	51	hpv81	Positive(+)
2019-10-31	45635596	32	hpv16	Positive(+)
2019-10-31	45635596	32	hpv52	Positive(+)
2019-10-31	45635596	32	hpv66	Positive(+)
2019-10-31	45637598	52	hpv53	Positive(+)
2019-10-31	45632603	26	hpv18	Positive(+)
2019-10-31	45632603	26	hpv59	Positive(+)
2019-10-31	45647608	23	hpv52	Positive(+)
2019-10-31	45648609	43	hpv58	Positive(+)
2019-10-31	45643614	40	hpv40	Positive(+)
2019-10-31	45646617	50	hpv58	Positive(+)
2019-10-31	45667618	48	hpv55	Positive(+)
2019-10-31	45664625	45	hpv45	Positive(+)
2019-10-31	45665626	35	hpv45	Positive(+)
2019-10-31	45672633	41	hpv45	Positive(+)
2019-10-31	45672633	41	hpv51	Positive(+)

## Sheet: Single infection
Time	Record	Age	HPV genotype	Result
2016-07-28	26027105	31	hpv06	Positive(+)
2016-07-28	89882109	44	hpv55	Positive(+)
2016-08-04	28259105	46	hpv53	Positive(+)
2016-08-11	00621113	45	hpv16	Positive(+)
2016-08-18	10026102	32	hpv58	Positive(+)
2016-08-18	00019104	42	hpv82	Positive(+)
2016-08-18	00001108	48	hpv16	Positive(+)
2016-08-18	17003116	34	hpv16	Positive(+)
2016-08-25	18257111	40	hpv59	Positive(+)
2016-08-25	00001118	27	hpv56	Positive(+)
2016-09-01	25014105	33	hpv43	Positive(+)
2016-09-01	17079109	43	hpv44	Positive(+)
2016-09-01	13002117	38	hpv53	Positive(+)
2016-09-05	01018103	44	hpv16	Positive(+)
2016-09-08	01256114	40	hpv16	Positive(+)
2016-09-18	12256107	40	hpv61	Positive(+)
2016-09-18	00015108	28	hpv39	Positive(+)
2016-09-18	00001112	46	hpv61	Positive(+)
2016-09-22	00008104	42	hpv35	Positive(+)
2016-09-22	00022110	39	hpv43	Positive(+)
2016-09-22	19022111	45	hpv58	Positive(+)
2016-09-22	00004112	53	hpv18	Positive(+)
2016-09-22	00009121	55	hpv66	Positive(+)
2016-09-29	26049108	51	hpv53	Positive(+)
2016-09-29	28201115	42	hpv33	Positive(+)
2016-10-14	00319102	42	hpv81	Positive(+)
2016-10-14	07088106	45	hpv81	Positive(+)
2016-10-21	00460105	32	hpv06	Positive(+)
2016-10-21	25007109	27	hpv59	Positive(+)
2016-10-21	03186113	39	hpv39	Positive(+)
2016-10-29	94344112	31	hpv58	Positive(+)
2016-10-29	14047114	37	hpv18	Positive(+)
2016-10-29	00197120	60	hpv56	Positive(+)
2016-10-29	00235124	45	hpv61	Positive(+)
2016-10-29	00248131	48	hpv82	Positive(+)
2016-10-29	04154141	45	hpv11	Positive(+)
2016-11-03	00413127	38	hpv55	Positive(+)
2016-11-03	00431130	23	hpv33	Positive(+)
2016-11-11	00016101	53	hpv39	Positive(+)
2016-11-11	00802104	34	hpv16	Positive(+)
2016-11-11	00061106	35	hpv39	Positive(+)
2016-11-11	00097107	40	hpv51	Positive(+)
2016-11-11	00078109	47	hpv58	Positive(+)
2016-11-11	00854112	22	hpv81	Positive(+)
2016-11-11	00832127	27	hpv56	Positive(+)
2016-11-11	00638132	39	hpv42	Positive(+)
2016-11-18	11005103	67	hpv18	Positive(+)
2016-11-18	15022116	29	hpv66	Positive(+)
2016-11-25	00007122	28	hpv43	Positive(+)
2016-11-25	00066135	50	hpv39	Positive(+)
2016-11-25	00079142	52	hpv61	Positive(+)
2016-11-25	21021143	49	hpv58	Positive(+)
2016-12-02	94308113	35	hpv16	Positive(+)
2016-12-08	02036107	32	hpv55	Positive(+)
2016-12-08	06202109	36	hpv33	Positive(+)
2016-12-08	05232110	55	hpv33	Positive(+)
2016-12-08	94408113	41	hpv33	Positive(+)
2016-12-13	17010104	35	hpv18	Positive(+)
2016-12-13	00179105	47	hpv42	Positive(+)
2016-12-30	00002106	48	hpv81	Positive(+)
2016-12-30	00001108	44	hpv56	Positive(+)
2016-12-30	00010111	48	hpv43	Positive(+)
2016-12-30	00011113	48	hpv66	Positive(+)
2016-12-30	19263114	33	hpv42	Positive(+)
2016-12-30	28014120	24	hpv58	Positive(+)
2017-01-20	00001108	76	hpv43	Positive(+)
2017-01-20	13256109	33	hpv55	Positive(+)
2017-01-20	00051119	43	hpv43	Positive(+)
2017-01-26	00080101	51	hpv43	Positive(+)
2017-02-10	15029103	34	hpv16	Positive(+)
2017-02-10	07011105	40	hpv18	Positive(+)
2017-02-17	52114111	54	hpv52	Positive(+)
2017-02-17	52113112	58	hpv51	Positive(+)
2017-02-24	20020106	44	hpv53	Positive(+)
2017-02-24	17013108	33	hpv16	Positive(+)
2017-03-03	00046106	37	hpv16	Positive(+)
2017-03-03	00021115	41	hpv58	Positive(+)
2017-03-03	00026120	33	hpv52	Positive(+)
2017-03-03	00002129	42	hpv55	Positive(+)
2017-03-03	00037130	62	hpv33	Positive(+)
2017-03-07	00040101	42	hpv51	Positive(+)
2017-03-07	03099106	44	hpv68	Positive(+)
2017-03-07	00107123	34	hpv18	Positive(+)
2017-03-08	00104167	55	hpv55	Positive(+)
2017-03-08	00074172	54	hpv58	Positive(+)
2017-03-14	00185183	51	hpv81	Positive(+)
2017-03-14	03192187	50	hpv16	Positive(+)
2017-03-14	03190191	54	hpv52	Positive(+)
2017-03-14	13049196	40	hpv44	Positive(+)
2017-03-14	00077199	51	hpv52	Positive(+)
2017-03-15	00062225	44	hpv35	Positive(+)
2017-03-16	00117253	47	hpv82	Positive(+)
2017-03-16	00176264	46	hpv16	Positive(+)
2017-03-16	00272273	46	hpv43	Positive(+)
2017-03-17	00234111	38	hpv33	Positive(+)
2017-03-17	00043116	25	hpv81	Positive(+)
2017-03-17	00082121	35	hpv16	Positive(+)
2017-03-17	00018125	42	hpv44	Positive(+)
2017-03-17	00079130	47	hpv81	Positive(+)
2017-03-17	00115133	45	hpv53	Positive(+)
2017-03-17	00095136	45	hpv52	Positive(+)
2017-03-17	00126142	49	hpv55	Positive(+)
2017-03-17	00070149	50	hpv52	Positive(+)
2017-03-17	00037150	54	hpv51	Positive(+)
2017-03-17	00005152	44	hpv06	Positive(+)
2017-03-17	00086160	47	hpv58	Positive(+)
2017-03-17	00106170	46	hpv16	Positive(+)
2017-03-17	00014173	44	hpv53	Positive(+)
2017-03-17	00108181	48	hpv55	Positive(+)
2017-03-17	00083185	42	hpv45	Positive(+)
2017-03-17	00035286	34	hpv16	Positive(+)
2017-03-17	00098289	52	hpv53	Positive(+)
2017-03-17	00100292	44	hpv11	Positive(+)
2017-03-17	00289295	46	hpv51	Positive(+)
2017-03-22	00030135	32	hpv58	Positive(+)
2017-03-22	00039137	31	hpv55	Positive(+)
2017-03-24	00301156	35	hpv61	Positive(+)
2017-03-24	00019170	49	hpv33	Positive(+)
2017-03-24	00092176	41	hpv43	Positive(+)
2017-03-24	00162178	46	hpv16	Positive(+)
2017-03-24	00008179	48	hpv61	Positive(+)
2017-03-24	00032180	27	hpv58	Positive(+)
2017-03-24	00080181	49	hpv16	Positive(+)
2017-03-24	00139192	30	hpv56	Positive(+)
2017-03-28	00287203	38	hpv66	Positive(+)
2017-03-28	00101211	48	hpv55	Positive(+)
2017-03-28	00071212	41	hpv40	Positive(+)
2017-03-28	00078215	45	hpv53	Positive(+)
2017-03-28	00030223	48	hpv39	Positive(+)
2017-03-29	00018227	46	hpv33	Positive(+)
2017-03-29	00171238	53	hpv35	Positive(+)
2017-04-08	05301255	39	hpv43	Positive(+)
2017-04-10	28321264	36	hpv52	Positive(+)
2017-04-14	00009271	49	hpv53	Positive(+)
2017-04-18	12068286	32	hpv55	Positive(+)
2017-05-04	07480302	48	hpv52	Positive(+)
2017-05-12	00004327	43	hpv16	Positive(+)
2017-05-12	00416338	52	hpv58	Positive(+)
2017-05-18	13308381	43	hpv82	Positive(+)
2017-05-26	51104408	36	hpv52	Positive(+)
2017-06-02	19321411	38	hpv81	Positive(+)
2017-06-02	16827419	49	hpv61	Positive(+)
2017-06-09	26954421	52	hpv61	Positive(+)
2017-06-16	16072442	31	hpv16	Positive(+)
2017-06-16	13314454	28	hpv55	Positive(+)
2017-06-23	31255466	37	hpv39	Positive(+)
2017-06-23	27969470	31	hpv52	Positive(+)
2017-06-30	34804482	29	hpv33	Positive(+)
2017-07-14	43570500	49	hpv66	Positive(+)
2017-07-14	45294508	44	hpv39	Positive(+)
2017-07-14	34796509	38	hpv66	Positive(+)
2017-07-27	39079522	39	hpv83	Positive(+)
2017-07-27	48323527	41	hpv31	Positive(+)
2017-08-04	58030529	47	hpv43	Positive(+)
2017-08-04	59635533	33	hpv45	Positive(+)
2017-08-17	66623546	55	hpv56	Positive(+)
2017-08-25	68087555	46	hpv81	Positive(+)
2017-08-25	00037556	43	hpv52	Positive(+)
2017-08-31	69612565	50	hpv56	Positive(+)
2017-08-31	69626567	45	hpv39	Positive(+)
2017-08-31	69962570	56	hpv42	Positive(+)
2017-08-31	69675572	36	hpv31	Positive(+)
2017-08-31	71099573	45	hpv44	Positive(+)
2017-08-31	71497574	54	hpv18	Positive(+)
2017-08-31	69627579	49	hpv33	Positive(+)
2017-08-31	69483581	47	hpv81	Positive(+)
2017-08-31	70075598	49	hpv44	Positive(+)
2017-08-31	69782618	69	hpv59	Positive(+)
2017-08-31	70060619	55	hpv55	Positive(+)
2017-08-31	69850627	59	hpv06	Positive(+)
2017-09-08	53210638	54	hpv66	Positive(+)
2017-09-08	68006642	44	hpv53	Positive(+)
2017-09-08	61050650	52	hpv40	Positive(+)
2017-09-08	69880655	59	hpv53	Positive(+)
2017-09-08	69802657	60	hpv81	Positive(+)
2017-09-14	69868683	64	hpv56	Positive(+)
2017-09-14	81034685	46	hpv66	Positive(+)
2017-09-14	81124692	54	hpv39	Positive(+)
2017-09-14	81122695	50	hpv66	Positive(+)
2017-09-20	69923706	57	hpv61	Positive(+)
2017-09-20	71143707	70	hpv16	Positive(+)
2017-09-20	68204711	48	hpv53	Positive(+)
2017-09-20	69625716	35	hpv44	Positive(+)
2017-09-20	69756720	63	hpv06	Positive(+)
2017-09-20	82359731	31	hpv51	Positive(+)
2017-09-20	70085732	53	hpv81	Positive(+)
2017-09-20	69989738	60	hpv68	Positive(+)
2017-09-20	82376745	49	hpv35	Positive(+)
2017-09-20	69956758	56	hpv81	Positive(+)
2017-09-21	82433781	28	hpv42	Positive(+)
2017-09-21	82939784	46	hpv58	Positive(+)
2017-09-21	83905794	32	hpv43	Positive(+)
2017-09-21	82404796	48	hpv52	Positive(+)
2017-09-21	83026803	47	hpv59	Positive(+)
2017-09-21	82351813	51	hpv42	Positive(+)
2017-09-22	83730833	48	hpv56	Positive(+)
2017-09-22	83027835	45	hpv66	Positive(+)
2017-09-22	82916846	51	hpv42	Positive(+)
2017-09-22	82996848	46	hpv55	Positive(+)
2017-09-22	82143854	45	hpv44	Positive(+)
2017-09-22	84045856	52	hpv52	Positive(+)
2017-09-22	84706859	49	hpv52	Positive(+)
2017-09-22	83679861	30	hpv43	Positive(+)
2017-09-25	83583889	31	hpv39	Positive(+)
2017-09-25	83573893	35	hpv82	Positive(+)
2017-09-25	83098920	44	hpv56	Positive(+)
2017-09-25	16075933	70	hpv16	Positive(+)
2017-09-25	83389953	51	hpv58	Positive(+)
2017-09-25	83130964	47	hpv52	Positive(+)
2017-09-25	83093968	34	hpv58	Positive(+)
2017-09-27	83557972	36	hpv51	Positive(+)
2017-09-27	82931976	42	hpv16	Positive(+)
2017-09-27	69959982	56	hpv45	Positive(+)
2017-09-27	83222983	45	hpv18	Positive(+)
2017-09-27	83527995	35	hpv45	Positive(+)
2017-09-27	83119999	30	hpv58	Positive(+)
2017-09-27	83201019	45	hpv45	Positive(+)
2017-09-27	83607026	34	hpv58	Positive(+)
2017-09-27	83202032	44	hpv45	Positive(+)
2017-09-27	83072042	48	hpv56	Positive(+)
2017-09-27	83449048	48	hpv55	Positive(+)
2017-09-28	83783069	28	hpv52	Positive(+)
2017-09-28	83632074	30	hpv16	Positive(+)
2017-09-28	84201087	54	hpv58	Positive(+)
2017-09-28	83274088	52	hpv43	Positive(+)
2017-09-28	84053089	51	hpv52	Positive(+)
2017-09-28	83758098	27	hpv39	Positive(+)
2017-09-29	82955106	29	hpv45	Positive(+)
2017-09-29	87485117	32	hpv61	Positive(+)
2017-09-29	88509126	30	hpv82	Positive(+)
2017-09-29	84206132	35	hpv42	Positive(+)
2017-09-29	83416141	31	hpv39	Positive(+)
2017-09-29	83321148	52	hpv39	Positive(+)
2017-09-30	87457154	30	hpv56	Positive(+)
2017-09-30	84195161	37	hpv51	Positive(+)
2017-09-30	83538176	28	hpv45	Positive(+)
2017-09-30	83324182	28	hpv56	Positive(+)
2017-09-30	84135184	52	hpv45	Positive(+)
2017-09-30	83237190	43	hpv56	Positive(+)
2017-09-30	83509207	48	hpv61	Positive(+)
2017-09-30	83238211	49	hpv39	Positive(+)
2017-09-30	83343212	28	hpv52	Positive(+)
2017-09-30	83452214	48	hpv52	Positive(+)
2017-10-09	84070219	30	hpv61	Positive(+)
2017-10-09	84077220	28	hpv16	Positive(+)
2017-10-09	83141225	51	hpv52	Positive(+)
2017-10-09	84226227	31	hpv61	Positive(+)
2017-10-09	90872237	25	hpv16	Positive(+)
2017-10-09	84251243	40	hpv53	Positive(+)
2017-10-09	83065260	44	hpv33	Positive(+)
2017-10-12	83205279	35	hpv45	Positive(+)
2017-10-12	83366282	46	hpv58	Positive(+)
2017-10-12	83661283	35	hpv61	Positive(+)
2017-10-12	82206293	47	hpv55	Positive(+)
2017-10-12	83082298	41	hpv40	Positive(+)
2017-10-12	90797309	42	hpv45	Positive(+)
2017-10-12	90802313	32	hpv45	Positive(+)
2017-10-12	91801322	50	hpv51	Positive(+)
2017-10-19	91285356	42	hpv45	Positive(+)
2017-10-19	83722366	48	hpv58	Positive(+)
2017-10-26	83024411	30	hpv44	Positive(+)
2017-10-26	83476418	45	hpv31	Positive(+)
2017-11-03	01880439	54	hpv16	Positive(+)
2017-11-03	02086456	46	hpv39	Positive(+)
2017-11-03	02122460	45	hpv53	Positive(+)
2017-11-03	83746500	31	hpv66	Positive(+)
2017-11-07	04186517	38	hpv66	Positive(+)
2017-11-07	08107519	80	hpv43	Positive(+)
2017-11-07	08033540	42	hpv53	Positive(+)
2017-11-07	07960564	41	hpv52	Positive(+)
2017-11-07	07969588	49	hpv43	Positive(+)
2017-11-07	03548601	28	hpv66	Positive(+)
2017-11-09	07637609	43	hpv16	Positive(+)
2017-11-13	69564614	42	hpv39	Positive(+)
2017-11-16	13395682	47	hpv53	Positive(+)
2017-11-16	13398684	65	hpv52	Positive(+)
2017-11-16	13399685	24	hpv44	Positive(+)
2017-11-16	09401688	54	hpv53	Positive(+)
2017-11-16	94248689	43	hpv51	Positive(+)
2017-11-23	05885704	36	hpv81	Positive(+)
2017-11-23	11247710	47	hpv52	Positive(+)
2017-11-23	11200714	51	hpv52	Positive(+)
2017-11-23	11199722	52	hpv55	Positive(+)
2017-11-23	16747727	36	hpv39	Positive(+)
2017-11-23	14311731	34	hpv51	Positive(+)
2017-11-30	27167758	38	hpv58	Positive(+)
2017-11-30	13844787	44	hpv51	Positive(+)
2017-12-07	07915806	44	hpv16	Positive(+)
2018-01-18	31020866	40	hpv66	Positive(+)
2018-01-18	30624870	42	hpv61	Positive(+)
2018-01-18	30596871	44	hpv31	Positive(+)
2018-01-18	30600873	44	hpv58	Positive(+)
2018-02-22	33701893	34	hpv58	Positive(+)
2018-03-08	37389910	32	hpv52	Positive(+)
2018-03-16	37666914	36	hpv18	Positive(+)
2018-03-16	36332920	44	hpv81	Positive(+)
2018-03-22	37584939	39	hpv58	Positive(+)
2018-04-04	44587963	37	hpv18	Positive(+)
2018-04-04	44591968	45	hpv16	Positive(+)
2018-04-12	44685974	49	hpv61	Positive(+)
2018-04-12	48579979	42	hpv16	Positive(+)
2018-04-12	50228980	39	hpv61	Positive(+)
2018-04-12	50517985	47	hpv44	Positive(+)
2018-04-19	04566994	48	hpv51	Positive(+)
2018-04-19	46987003	46	hpv53	Positive(+)
2018-04-19	46976007	53	hpv66	Positive(+)
2018-04-19	53342027	37	hpv55	Positive(+)
2018-04-19	53230031	35	hpv55	Positive(+)
2018-04-19	48485041	31	hpv52	Positive(+)
2018-04-26	53979059	33	hpv51	Positive(+)
2018-05-03	53229091	39	hpv52	Positive(+)
2018-05-03	18377098	49	hpv43	Positive(+)
2018-05-10	54954113	35	hpv61	Positive(+)
2018-05-10	60618122	30	hpv35	Positive(+)
2018-05-10	61005133	35	hpv82	Positive(+)
2018-05-10	52075137	55	hpv16	Positive(+)
2018-05-10	57113139	42	hpv52	Positive(+)
2018-05-17	58106168	44	hpv16	Positive(+)
2018-05-23	16314199	39	hpv43	Positive(+)
2018-05-23	16290235	49	hpv45	Positive(+)
2018-05-23	16695236	56	hpv55	Positive(+)
2018-05-23	66564238	54	hpv66	Positive(+)
2018-05-23	16440253	38	hpv16	Positive(+)
2018-05-23	67364277	52	hpv59	Positive(+)
2018-06-01	16328285	37	hpv39	Positive(+)
2018-06-01	68933288	48	hpv44	Positive(+)
2018-06-01	55247299	42	hpv55	Positive(+)
2018-06-01	31419301	68	hpv16	Positive(+)
2018-06-01	07615303	59	hpv51	Positive(+)
2018-06-01	07614308	54	hpv16	Positive(+)
2018-06-01	19328311	34	hpv61	Positive(+)
2018-06-01	16129313	50	hpv52	Positive(+)
2018-06-01	16537318	46	hpv43	Positive(+)
2018-06-07	15928344	50	hpv81	Positive(+)
2018-06-07	19319345	35	hpv52	Positive(+)
2018-06-07	63272348	29	hpv33	Positive(+)
2018-06-07	34190350	44	hpv39	Positive(+)
2018-06-14	16315360	50	hpv06	Positive(+)
2018-06-14	16066370	36	hpv52	Positive(+)
2018-06-14	74855371	39	hpv18	Positive(+)
2018-06-14	74625373	45	hpv18	Positive(+)
2018-06-21	16409385	34	hpv68	Positive(+)
2018-06-21	76771388	62	hpv52	Positive(+)
2018-06-21	75373389	66	hpv52	Positive(+)
2018-06-21	51657395	31	hpv52	Positive(+)
2018-06-28	77809402	59	hpv52	Positive(+)
2018-06-28	78229403	66	hpv51	Positive(+)
2018-06-28	78559407	60	hpv53	Positive(+)
2018-06-28	79017413	40	hpv43	Positive(+)
2018-07-05	80507426	31	hpv61	Positive(+)
2018-07-05	79912427	31	hpv66	Positive(+)
2018-07-05	75844433	31	hpv31	Positive(+)
2018-07-05	79913444	39	hpv68	Positive(+)
2018-07-19	83631495	49	hpv52	Positive(+)
2018-07-19	61660499	40	hpv56	Positive(+)
2018-07-19	57783516	55	hpv33	Positive(+)
2018-07-27	86057526	56	hpv39	Positive(+)
2018-07-27	86132542	43	hpv52	Positive(+)
2018-07-27	86120543	39	hpv55	Positive(+)
2018-07-27	69279550	53	hpv68	Positive(+)
2018-07-27	05304552	31	hpv52	Positive(+)
2018-08-01	89966578	36	hpv44	Positive(+)
2018-08-01	02042584	42	hpv16	Positive(+)
2018-08-01	89979585	44	hpv52	Positive(+)
2018-08-01	02041633	35	hpv35	Positive(+)
2018-08-01	88511645	61	hpv53	Positive(+)
2018-08-01	88398649	36	hpv66	Positive(+)
2018-08-03	81394655	32	hpv16	Positive(+)
2018-08-03	88368663	37	hpv61	Positive(+)
2018-08-03	88374674	53	hpv66	Positive(+)
2018-08-03	88404678	35	hpv45	Positive(+)
2018-08-03	90794682	40	hpv11	Positive(+)
2018-08-09	91280706	47	hpv44	Positive(+)
2018-08-09	90386728	61	hpv51	Positive(+)
2018-08-09	88437732	36	hpv52	Positive(+)
2018-08-09	88353733	52	hpv06	Positive(+)
2018-08-09	92250743	32	hpv44	Positive(+)
2018-08-09	88442750	40	hpv52	Positive(+)
2018-08-09	92712751	66	hpv42	Positive(+)
2018-08-14	94398768	51	hpv51	Positive(+)
2018-08-14	89999790	30	hpv81	Positive(+)
2018-08-14	11209795	30	hpv58	Positive(+)
2018-08-14	90075808	43	hpv66	Positive(+)
2018-08-14	11205819	36	hpv66	Positive(+)
2018-08-14	91989820	41	hpv61	Positive(+)
2018-08-14	11216825	36	hpv45	Positive(+)
2018-08-14	90021829	31	hpv16	Positive(+)
2018-08-14	90043832	33	hpv52	Positive(+)
2018-08-17	72765848	31	hpv52	Positive(+)
2018-08-24	97010864	29	hpv45	Positive(+)
2018-08-24	90475879	35	hpv44	Positive(+)
2018-08-24	98149881	55	hpv61	Positive(+)
2018-08-31	99085889	35	hpv59	Positive(+)
2018-08-31	99070891	40	hpv68	Positive(+)
2018-08-31	02791901	30	hpv16	Positive(+)
2018-09-06	61691910	40	hpv61	Positive(+)
2018-09-14	01446933	50	hpv52	Positive(+)
2018-09-14	03539938	53	hpv61	Positive(+)
2018-09-14	06911956	40	hpv35	Positive(+)
2018-09-14	06562973	40	hpv58	Positive(+)
2018-09-14	11130977	48	hpv39	Positive(+)
2018-09-14	11160982	40	hpv56	Positive(+)
2018-09-14	05054990	39	hpv52	Positive(+)
2018-09-14	20014997	32	hpv52	Positive(+)
2018-09-21	11190101	53	hpv45	Positive(+)
2018-09-21	05136116	51	hpv53	Positive(+)
2018-09-21	05122126	65	hpv61	Positive(+)
2018-09-21	13469133	35	hpv52	Positive(+)
2018-09-21	14025158	50	hpv52	Positive(+)
2018-09-28	03870161	33	hpv61	Positive(+)
2018-09-28	14768163	39	hpv52	Positive(+)
2018-09-28	11171165	29	hpv59	Positive(+)
2018-09-28	12216166	62	hpv39	Positive(+)
2018-09-28	61564172	42	hpv59	Positive(+)
2018-09-28	06553174	27	hpv68	Positive(+)
2018-09-28	05222186	35	hpv59	Positive(+)
2018-09-28	72728190	37	hpv58	Positive(+)
2018-09-28	72674195	47	hpv59	Positive(+)
2018-10-12	14629196	39	hpv66	Positive(+)
2018-10-12	15410210	29	hpv16	Positive(+)
2018-10-12	61603217	37	hpv55	Positive(+)
2018-10-12	61705220	35	hpv81	Positive(+)
2018-10-12	16635226	33	hpv68	Positive(+)
2018-10-12	13485227	36	hpv52	Positive(+)
2018-10-12	17605245	50	hpv53	Positive(+)
2018-10-12	16464246	42	hpv51	Positive(+)
2018-10-16	16521256	30	hpv45	Positive(+)
2018-10-16	19130263	39	hpv16	Positive(+)
2018-10-16	18992270	29	hpv56	Positive(+)
2018-10-16	19038273	56	hpv58	Positive(+)
2018-10-19	91683274	54	hpv33	Positive(+)
2018-10-19	19280281	30	hpv44	Positive(+)
2018-10-19	19251283	36	hpv68	Positive(+)
2018-10-26	20720300	47	hpv59	Positive(+)
2018-10-30	07918335	35	hpv52	Positive(+)
2018-10-30	08032336	46	hpv61	Positive(+)
2018-10-30	90280340	44	hpv81	Positive(+)
2018-10-30	22573344	33	hpv45	Positive(+)
2018-10-30	07876349	44	hpv16	Positive(+)
2018-10-30	08037358	56	hpv61	Positive(+)
2018-10-30	07987373	55	hpv55	Positive(+)
2018-10-30	21262377	49	hpv52	Positive(+)
2018-10-30	07874389	37	hpv45	Positive(+)
2018-10-30	07946395	49	hpv52	Positive(+)
2018-10-30	07917401	43	hpv81	Positive(+)
2018-10-30	22557407	28	hpv55	Positive(+)
2018-10-30	22560408	39	hpv53	Positive(+)
2018-10-30	07890410	29	hpv68	Positive(+)
2018-11-02	23349426	49	hpv44	Positive(+)
2018-11-02	98433440	26	hpv16	Positive(+)
2018-11-06	25236454	18	hpv55	Positive(+)
2018-11-06	34241457	53	hpv52	Positive(+)
2018-11-06	25231463	28	hpv81	Positive(+)
2018-11-06	98603468	37	hpv52	Positive(+)
2018-11-06	07990490	53	hpv56	Positive(+)
2018-11-06	08092520	63	hpv81	Positive(+)
2018-11-06	07916531	46	hpv42	Positive(+)
2018-11-09	26145546	50	hpv53	Positive(+)
2018-11-09	99693547	31	hpv51	Positive(+)
2018-11-09	25551549	25	hpv66	Positive(+)
2018-11-14	22795600	31	hpv52	Positive(+)
2018-11-14	24654611	45	hpv55	Positive(+)
2018-11-14	24875613	53	hpv52	Positive(+)
2018-11-14	23460628	42	hpv61	Positive(+)
2018-11-14	90346654	66	hpv16	Positive(+)
2018-11-19	29310655	31	hpv52	Positive(+)
2018-11-19	08007667	46	hpv58	Positive(+)
2018-11-19	25306675	48	hpv68	Positive(+)
2018-11-19	97110679	34	hpv16	Positive(+)
2018-11-19	15570680	35	hpv52	Positive(+)
2018-11-26	29595705	60	hpv52	Positive(+)
2018-11-26	20861714	51	hpv58	Positive(+)
2018-11-26	23344725	60	hpv81	Positive(+)
2018-11-26	23165731	49	hpv55	Positive(+)
2018-11-26	30354740	43	hpv16	Positive(+)
2018-11-26	23202747	39	hpv58	Positive(+)
2018-11-28	23271776	31	hpv39	Positive(+)
2018-11-28	31345778	43	hpv81	Positive(+)
2018-11-28	23179789	54	hpv51	Positive(+)
2018-11-28	23203793	49	hpv44	Positive(+)
2018-11-28	94540811	63	hpv61	Positive(+)
2018-11-28	94412813	47	hpv52	Positive(+)
2018-11-28	94350816	51	hpv61	Positive(+)
2018-11-28	94479825	51	hpv53	Positive(+)
2018-11-28	94485846	40	hpv16	Positive(+)
2018-11-28	94466858	43	hpv61	Positive(+)
2018-11-30	94353871	55	hpv81	Positive(+)
2018-11-30	94454876	45	hpv51	Positive(+)
2018-11-30	30659878	30	hpv59	Positive(+)
2018-11-30	94340886	38	hpv58	Positive(+)
2018-11-30	94534902	55	hpv56	Positive(+)
2018-11-30	97824905	43	hpv52	Positive(+)
2018-11-30	97826907	44	hpv58	Positive(+)
2018-11-30	31727910	51	hpv43	Positive(+)
2018-11-30	31738913	40	hpv59	Positive(+)
2018-11-30	31029914	36	hpv18	Positive(+)
2018-12-07	31661930	32	hpv58	Positive(+)
2018-12-07	90046969	31	hpv82	Positive(+)
2018-12-07	33200990	37	hpv52	Positive(+)
2018-12-07	97106006	38	hpv59	Positive(+)
2018-12-14	37808022	39	hpv33	Positive(+)
2018-12-14	36762026	44	hpv81	Positive(+)
2018-12-14	92839034	52	hpv59	Positive(+)
2018-12-14	44446046	40	hpv58	Positive(+)
2018-12-14	02079049	37	hpv59	Positive(+)
2018-12-14	94934056	49	hpv18	Positive(+)
2018-12-14	02092066	65	hpv52	Positive(+)
2018-12-14	27816071	33	hpv58	Positive(+)
2018-12-21	02067104	43	hpv52	Positive(+)
2018-12-21	39615106	33	hpv68	Positive(+)
2018-12-26	40185120	52	hpv58	Positive(+)
2018-12-26	14347121	29	hpv35	Positive(+)
2018-12-26	36753122	58	hpv82	Positive(+)
2018-12-26	13902124	41	hpv45	Positive(+)
2018-12-26	14423125	39	hpv56	Positive(+)
2018-12-26	19743138	41	hpv39	Positive(+)
2018-12-26	14235144	49	hpv81	Positive(+)
2018-12-26	14381146	42	hpv45	Positive(+)
2018-12-26	13937177	50	hpv61	Positive(+)
2018-12-26	13930183	40	hpv58	Positive(+)
2018-12-26	14384192	39	hpv81	Positive(+)
2018-12-28	36755206	59	hpv61	Positive(+)
2018-12-28	13855208	43	hpv59	Positive(+)
2018-12-28	40604214	53	hpv45	Positive(+)
2018-12-28	13896225	45	hpv52	Positive(+)
2019-01-04	41170244	62	hpv52	Positive(+)
2019-01-04	40166247	42	hpv16	Positive(+)
2019-01-10	41446266	54	hpv44	Positive(+)
2019-01-10	13874267	44	hpv52	Positive(+)
2019-01-10	86646278	57	hpv81	Positive(+)
2019-01-21	10898292	41	hpv16	Positive(+)
2019-01-21	14254296	30	hpv53	Positive(+)
2019-01-21	36288301	29	hpv66	Positive(+)
2019-01-21	43032303	55	hpv42	Positive(+)
2019-01-25	43908306	27	hpv52	Positive(+)
2019-01-25	43968321	28	hpv16	Positive(+)
2019-02-01	44623325	52	hpv16	Positive(+)
2019-02-01	32062334	51	hpv66	Positive(+)
2019-02-15	44991335	48	hpv56	Positive(+)
2019-02-15	44735337	45	hpv35	Positive(+)
2019-02-15	39904344	53	hpv44	Positive(+)
2019-02-22	45354361	50	hpv53	Positive(+)
2019-02-22	45370363	54	hpv16	Positive(+)
2019-02-22	45824368	27	hpv52	Positive(+)
2019-02-22	15371369	52	hpv43	Positive(+)
2019-03-01	46724379	33	hpv45	Positive(+)
2019-03-01	35626384	56	hpv18	Positive(+)
2019-03-01	46937396	35	hpv39	Positive(+)
2019-03-07	48522429	38	hpv40	Positive(+)
2019-03-18	16418432	55	hpv66	Positive(+)
2019-03-18	49122457	37	hpv52	Positive(+)
2019-03-18	49293472	52	hpv44	Positive(+)
2019-03-18	28415493	35	hpv61	Positive(+)
2019-03-18	49740510	55	hpv59	Positive(+)
2019-03-22	13306525	43	hpv81	Positive(+)
2019-03-22	50665537	53	hpv35	Positive(+)
2019-03-22	13307540	45	hpv51	Positive(+)
2019-03-22	16533544	36	hpv61	Positive(+)
2019-03-22	50908549	30	hpv06	Positive(+)
2019-03-22	28407554	30	hpv52	Positive(+)
2019-03-29	64564560	45	hpv55	Positive(+)
2019-03-29	16429561	49	hpv43	Positive(+)
2019-03-29	51411567	45	hpv16	Positive(+)
2019-03-29	51457574	52	hpv44	Positive(+)
2019-03-29	53545586	49	hpv68	Positive(+)
2019-03-29	53549590	52	hpv40	Positive(+)
2019-03-29	53844599	44	hpv39	Positive(+)
2019-04-04	41056609	32	hpv16	Positive(+)
2019-04-04	54793617	61	hpv66	Positive(+)
2019-04-12	39908632	45	hpv52	Positive(+)
2019-04-12	41552637	57	hpv52	Positive(+)
2019-04-12	57407655	51	hpv81	Positive(+)
2019-04-12	56867656	43	hpv53	Positive(+)
2019-04-19	58027681	53	hpv61	Positive(+)
2019-04-19	55216687	40	hpv16	Positive(+)
2019-04-19	58082696	51	hpv52	Positive(+)
2019-04-26	08112716	56	hpv43	Positive(+)
2019-04-26	53226737	39	hpv61	Positive(+)
2019-04-26	60900765	45	hpv61	Positive(+)
2019-05-10	60901773	44	hpv61	Positive(+)
2019-05-10	59034788	53	hpv61	Positive(+)
2019-05-10	62399803	46	hpv18	Positive(+)
2019-05-10	63983815	45	hpv55	Positive(+)
2019-05-17	64518825	55	hpv31	Positive(+)
2019-05-17	64533826	46	hpv53	Positive(+)
2019-05-17	62639842	39	hpv58	Positive(+)
2019-05-17	65071844	43	hpv68	Positive(+)
2019-05-17	65305850	44	hpv68	Positive(+)
2019-05-17	64708863	41	hpv81	Positive(+)
2019-05-17	16267864	40	hpv59	Positive(+)
2019-05-17	52087869	60	hpv06	Positive(+)
2019-05-24	52034883	34	hpv66	Positive(+)
2019-05-24	65270898	38	hpv52	Positive(+)
2019-05-24	55213916	54	hpv44	Positive(+)
2019-05-24	55218917	36	hpv16	Positive(+)
2019-05-24	55220944	25	hpv42	Positive(+)
2019-05-24	55229945	43	hpv44	Positive(+)
2019-05-31	05258965	48	hpv53	Positive(+)
2019-05-31	65436969	32	hpv43	Positive(+)
2019-05-31	29286971	38	hpv52	Positive(+)
2019-05-31	43019988	46	hpv82	Positive(+)
2019-05-31	73569995	51	hpv58	Positive(+)
2019-05-31	27751996	34	hpv39	Positive(+)
2019-06-06	25494001	60	hpv58	Positive(+)
2019-06-06	25497015	43	hpv51	Positive(+)
2019-06-06	25499016	31	hpv55	Positive(+)
2019-06-06	25501026	36	hpv39	Positive(+)
2019-06-06	25512041	40	hpv16	Positive(+)
2019-06-14	16080048	43	hpv56	Positive(+)
2019-06-14	16085059	48	hpv44	Positive(+)
2019-06-14	16087077	49	hpv61	Positive(+)
2019-06-21	16077087	33	hpv56	Positive(+)
2019-06-21	16097097	32	hpv16	Positive(+)
2019-06-21	16089098	36	hpv16	Positive(+)
2019-06-21	43111102	30	hpv43	Positive(+)
2019-06-21	43236106	48	hpv83	Positive(+)
2019-06-21	43238108	35	hpv53	Positive(+)
2019-06-21	43239126	33	hpv44	Positive(+)
2019-06-21	43226129	36	hpv16	Positive(+)
2019-06-21	43246136	44	hpv52	Positive(+)
2019-06-21	43247137	31	hpv53	Positive(+)
2019-06-21	43250140	50	hpv16	Positive(+)
2019-06-21	82721143	30	hpv82	Positive(+)
2019-06-21	82728149	32	hpv39	Positive(+)
2019-06-21	82732153	32	hpv35	Positive(+)
2019-06-21	82733154	32	hpv53	Positive(+)
2019-06-21	82736167	49	hpv51	Positive(+)
2019-06-21	82741172	48	hpv42	Positive(+)
2019-06-21	82743174	58	hpv16	Positive(+)
2019-06-21	82744175	52	hpv16	Positive(+)
2019-06-21	82752183	37	hpv81	Positive(+)
2019-06-21	82763204	38	hpv53	Positive(+)
2019-06-28	81215170	25	hpv81	Positive(+)
2019-06-28	81221212	36	hpv16	Positive(+)
2019-06-28	81226217	45	hpv61	Positive(+)
2019-06-28	81230221	63	hpv18	Positive(+)
2019-06-28	81239240	31	hpv59	Positive(+)
2019-06-28	81237247	42	hpv61	Positive(+)
2019-06-28	81246258	32	hpv66	Positive(+)
2019-06-28	81240261	33	hpv56	Positive(+)
2019-06-28	81243264	34	hpv31	Positive(+)
2019-06-28	31154265	39	hpv31	Positive(+)
2019-06-28	31152273	42	hpv11	Positive(+)
2019-06-28	31155276	50	hpv61	Positive(+)
2019-06-28	31156277	42	hpv16	Positive(+)
2019-06-28	31157278	47	hpv52	Positive(+)
2019-07-05	31163294	39	hpv81	Positive(+)
2019-07-05	31162313	56	hpv58	Positive(+)
2019-07-05	31175317	59	hpv43	Positive(+)
2019-07-11	66148369	30	hpv18	Positive(+)
2019-07-11	66149370	28	hpv68	Positive(+)
2019-07-11	66151372	50	hpv16	Positive(+)
2019-07-11	66152383	30	hpv44	Positive(+)
2019-07-11	66161392	40	hpv81	Positive(+)
2019-07-11	66163394	30	hpv16	Positive(+)
2019-07-19	66174435	43	hpv61	Positive(+)
2019-07-19	66177438	44	hpv61	Positive(+)
2019-07-19	66135446	46	hpv16	Positive(+)
2019-07-19	66137448	42	hpv35	Positive(+)
2019-07-19	66130451	48	hpv52	Positive(+)
2019-07-19	66124455	40	hpv35	Positive(+)
2019-07-26	66122493	39	hpv55	Positive(+)
2019-07-26	66126497	52	hpv16	Positive(+)
2019-08-01	51145526	60	hpv53	Positive(+)
2019-08-01	51146537	40	hpv56	Positive(+)
2019-08-08	51160551	42	hpv18	Positive(+)
2019-08-08	51163554	45	hpv18	Positive(+)
2019-08-08	51169560	37	hpv33	Positive(+)
2019-08-08	51131562	49	hpv81	Positive(+)
2019-08-08	51136567	36	hpv66	Positive(+)
2019-08-08	51137568	48	hpv16	Positive(+)
2019-08-08	18211572	51	hpv18	Positive(+)
2019-08-08	18210581	51	hpv61	Positive(+)
2019-08-08	18212582	44	hpv58	Positive(+)
2019-08-16	18229600	33	hpv16	Positive(+)
2019-08-16	18232601	47	hpv52	Positive(+)
2019-08-16	18245606	49	hpv55	Positive(+)
2019-08-16	18246607	33	hpv16	Positive(+)
2019-08-16	18271611	47	hpv61	Positive(+)
2019-08-16	18274615	49	hpv18	Positive(+)
2019-08-16	18277618	36	hpv18	Positive(+)
2019-08-16	18281622	30	hpv51	Positive(+)
2019-08-23	18288639	45	hpv59	Positive(+)
2019-08-23	18292663	31	hpv81	Positive(+)
2019-08-30	18294675	42	hpv52	Positive(+)
2019-08-30	18298679	35	hpv55	Positive(+)
2019-08-30	43267696	41	hpv66	Positive(+)
2019-08-30	43266697	50	hpv31	Positive(+)
2019-08-30	43209710	54	hpv59	Positive(+)
2019-08-30	43219720	27	hpv52	Positive(+)
2019-08-30	43218729	42	hpv61	Positive(+)
2019-08-30	43237749	49	hpv53	Positive(+)
2019-08-30	43239750	42	hpv61	Positive(+)
2019-08-30	43241752	53	hpv82	Positive(+)
2019-08-30	43244765	61	hpv39	Positive(+)
2019-08-30	43248769	50	hpv39	Positive(+)
2019-09-04	43240771	47	hpv81	Positive(+)
2019-09-04	43277788	27	hpv18	Positive(+)
2019-09-04	83124805	47	hpv83	Positive(+)
2019-09-04	83126807	51	hpv66	Positive(+)
2019-09-04	83120811	38	hpv51	Positive(+)
2019-09-04	83137828	43	hpv52	Positive(+)
2019-09-04	83135831	54	hpv52	Positive(+)
2019-09-04	83133844	33	hpv59	Positive(+)
2019-09-04	83137858	38	hpv52	Positive(+)
2019-09-05	83144875	33	hpv58	Positive(+)
2019-09-05	83145886	36	hpv51	Positive(+)
2019-09-05	83146897	49	hpv53	Positive(+)
2019-09-05	83154925	49	hpv52	Positive(+)
2019-09-05	83155936	50	hpv61	Positive(+)
2019-09-05	83157948	51	hpv52	Positive(+)
2019-09-06	83151002	43	hpv16	Positive(+)
2019-09-06	83162013	34	hpv45	Positive(+)
2019-09-06	83113014	37	hpv45	Positive(+)
2019-09-06	83118019	50	hpv52	Positive(+)
2019-09-06	83190021	43	hpv68	Positive(+)
2019-09-06	68353041	72	hpv52	Positive(+)
2019-09-06	68356042	35	hpv53	Positive(+)
2019-09-06	68355046	33	hpv45	Positive(+)
2019-09-06	68358049	50	hpv31	Positive(+)
2019-09-06	68374050	31	hpv55	Positive(+)
2019-09-06	68372051	31	hpv52	Positive(+)
2019-09-06	33264055	52	hpv16	Positive(+)
2019-09-06	33268059	29	hpv39	Positive(+)
2019-09-06	33240069	47	hpv68	Positive(+)
2019-09-06	33238939	30	hpv31	Positive(+)
2019-09-06	33231942	47	hpv52	Positive(+)
2019-09-06	33237958	49	hpv43	Positive(+)
2019-09-06	33258959	31	hpv43	Positive(+)
2019-09-06	33254965	44	hpv52	Positive(+)
2019-09-06	33255986	30	hpv58	Positive(+)
2019-09-12	33259080	44	hpv59	Positive(+)
2019-09-12	33251082	63	hpv58	Positive(+)
2019-09-12	33282090	34	hpv56	Positive(+)
2019-09-12	33284095	33	hpv81	Positive(+)
2019-09-12	33283104	37	hpv18	Positive(+)
2019-09-12	33281112	46	hpv45	Positive(+)
2019-09-12	42121122	33	hpv68	Positive(+)
2019-09-12	42138129	51	hpv39	Positive(+)
2019-09-12	42133134	48	hpv52	Positive(+)
2019-09-12	42135136	55	hpv45	Positive(+)
2019-09-12	42138139	39	hpv81	Positive(+)
2019-09-12	42143144	65	hpv45	Positive(+)
2019-09-12	42147148	42	hpv16	Positive(+)
2019-09-12	42141152	37	hpv45	Positive(+)
2019-09-12	42150161	55	hpv81	Positive(+)
2019-09-12	42151162	47	hpv42	Positive(+)
2019-09-12	42152163	26	hpv45	Positive(+)
2019-09-12	42161171	40	hpv16	Positive(+)
2019-09-20	42165176	38	hpv45	Positive(+)
2019-09-20	42160181	37	hpv61	Positive(+)
2019-09-20	42163194	56	hpv52	Positive(+)
2019-09-20	42175216	32	hpv16	Positive(+)
2019-09-20	42189240	47	hpv45	Positive(+)
2019-09-20	42183244	56	hpv66	Positive(+)
2019-09-27	42187258	52	hpv16	Positive(+)
2019-09-27	42186267	44	hpv35	Positive(+)
2019-09-27	42197268	44	hpv81	Positive(+)
2019-09-27	42190270	49	hpv61	Positive(+)
2019-09-27	42194275	25	hpv53	Positive(+)
2019-09-27	59342282	31	hpv68	Positive(+)
2019-09-27	59345286	31	hpv43	Positive(+)
2019-09-27	59332293	39	hpv59	Positive(+)
2019-09-27	59338299	47	hpv45	Positive(+)
2019-09-27	59339310	32	hpv43	Positive(+)
2019-09-27	59442323	41	hpv45	Positive(+)
2019-09-27	59443334	37	hpv52	Positive(+)
2019-09-27	59444335	47	hpv45	Positive(+)
2019-09-27	59448339	32	hpv45	Positive(+)
2019-09-27	59481342	30	hpv44	Positive(+)
2019-09-27	59487348	66	hpv53	Positive(+)
2019-09-27	53486358	41	hpv53	Positive(+)
2019-10-11	53485378	41	hpv81	Positive(+)
2019-10-11	53482387	51	hpv18	Positive(+)
2019-10-11	53477398	42	hpv45	Positive(+)
2019-10-11	53478399	33	hpv52	Positive(+)
2019-10-11	53467408	39	hpv52	Positive(+)
2019-10-11	53460411	36	hpv18	Positive(+)
2019-10-11	53461412	43	hpv52	Positive(+)
2019-10-11	53459421	30	hpv45	Positive(+)
2019-10-11	53457431	51	hpv55	Positive(+)
2019-10-11	53452435	50	hpv45	Positive(+)
2019-10-17	53451392	56	hpv53	Positive(+)
2019-10-17	53447448	56	hpv81	Positive(+)
2019-10-17	53432451	37	hpv53	Positive(+)
2019-10-17	53434455	52	hpv16	Positive(+)
2019-10-17	53434469	35	hpv58	Positive(+)
2019-10-17	53427486	63	hpv45	Positive(+)
2019-10-17	53428491	46	hpv59	Positive(+)
2019-10-17	53429498	38	hpv43	Positive(+)
2019-10-17	53425499	41	hpv45	Positive(+)
2019-10-24	53423500	47	hpv45	Positive(+)
2019-10-24	53422503	36	hpv83	Positive(+)
2019-10-24	53417506	56	hpv52	Positive(+)
2019-10-24	53418541	38	hpv61	Positive(+)
2019-10-24	53415544	43	hpv55	Positive(+)
2019-10-24	53413555	35	hpv06	Positive(+)
2019-10-24	53414560	37	hpv52	Positive(+)
2019-10-24	45614575	31	hpv66	Positive(+)
2019-10-24	45616577	43	hpv59	Positive(+)
2019-10-24	45619581	43	hpv56	Positive(+)
2019-10-24	45623585	50	hpv53	Positive(+)
2019-10-31	45627588	42	hpv68	Positive(+)
2019-10-31	45637598	52	hpv53	Positive(+)
2019-10-31	45647608	23	hpv52	Positive(+)
2019-10-31	45648609	43	hpv58	Positive(+)
2019-10-31	45643614	40	hpv40	Positive(+)
2019-10-31	45646617	50	hpv58	Positive(+)
2019-10-31	45667618	48	hpv55	Positive(+)
2019-10-31	45664625	45	hpv45	Positive(+)
2019-10-31	45665626	35	hpv45	Positive(+)

## Sheet: Double infecitons
Time	Record	Age	HPV genotype	Result
2016-09-08	00032111	26	hpv55	Positive(+)
2016-09-08	00032111	26	hpv61	Positive(+)
2016-09-08	07005117	46	hpv43	Positive(+)
2016-09-08	07005117	46	hpv51	Positive(+)
2016-09-29	19133107	53	hpv61	Positive(+)
2016-09-29	19133107	53	hpv68	Positive(+)
2016-09-29	12058109	44	hpv42	Positive(+)
2016-09-29	12058109	44	hpv55	Positive(+)
2016-10-29	00621136	40	hpv16	Positive(+)
2016-10-29	00621136	40	hpv18	Positive(+)
2016-10-29	26003139	30	hpv40	Positive(+)
2016-10-29	26003139	30	hpv66	Positive(+)
2016-11-03	00204136	42	hpv16	Positive(+)
2016-11-03	00204136	42	hpv33	Positive(+)
2016-11-18	14045112	38	hpv42	Positive(+)
2016-11-18	14045112	38	hpv61	Positive(+)
2016-12-02	00061118	51	hpv42	Positive(+)
2016-12-02	00061118	51	hpv61	Positive(+)
2016-12-15	00173118	45	hpv39	Positive(+)
2016-12-15	00173118	45	hpv52	Positive(+)
2016-12-23	09021101	24	hpv66	Positive(+)
2016-12-23	09021101	24	hpv82	Positive(+)
2016-12-23	00084106	47	hpv43	Positive(+)
2016-12-23	00084106	47	hpv52	Positive(+)
2017-02-17	09003104	57	hpv16	Positive(+)
2017-02-17	09003104	57	hpv58	Positive(+)
2017-03-03	00012131	36	hpv52	Positive(+)
2017-03-03	00012131	36	hpv81	Positive(+)
2017-03-08	00027156	40	hpv61	Positive(+)
2017-03-08	00027156	40	hpv81	Positive(+)
2017-03-14	97975185	43	hpv55	Positive(+)
2017-03-14	97975185	43	hpv58	Positive(+)
2017-03-15	00053217	50	hpv16	Positive(+)
2017-03-15	00053217	50	hpv81	Positive(+)
2017-03-16	14166236	55	hpv40	Positive(+)
2017-03-16	14166236	55	hpv61	Positive(+)
2017-03-17	00002114	46	hpv16	Positive(+)
2017-03-17	00002114	46	hpv81	Positive(+)
2017-03-17	00024117	53	hpv53	Positive(+)
2017-03-17	00024117	53	hpv58	Positive(+)
2017-03-17	00175197	46	hpv16	Positive(+)
2017-03-17	00175197	46	hpv44	Positive(+)
2017-03-17	00090198	49	hpv16	Positive(+)
2017-03-17	00090198	49	hpv61	Positive(+)
2017-03-22	00311107	34	hpv16	Positive(+)
2017-03-22	00311107	34	hpv58	Positive(+)
2017-03-22	00075120	41	hpv39	Positive(+)
2017-03-22	00075120	41	hpv61	Positive(+)
2017-03-22	00016132	31	hpv53	Positive(+)
2017-03-22	00016132	31	hpv66	Positive(+)
2017-03-24	00230186	51	hpv31	Positive(+)
2017-03-24	00230186	51	hpv52	Positive(+)
2017-03-24	00194187	45	hpv18	Positive(+)
2017-03-24	00194187	45	hpv53	Positive(+)
2017-03-30	00026243	49	hpv55	Positive(+)
2017-03-30	00026243	49	hpv83	Positive(+)
2017-05-04	50923307	49	hpv35	Positive(+)
2017-05-04	50923307	49	hpv51	Positive(+)
2017-05-04	50840318	53	hpv40	Positive(+)
2017-05-04	50840318	53	hpv44	Positive(+)
2017-06-16	14075444	39	hpv44	Positive(+)
2017-06-16	14075444	39	hpv52	Positive(+)
2017-07-07	41741492	61	hpv39	Positive(+)
2017-07-07	41741492	61	hpv61	Positive(+)
2017-08-17	66570548	23	hpv16	Positive(+)
2017-08-17	66570548	23	hpv53	Positive(+)
2017-08-17	62939549	39	hpv51	Positive(+)
2017-08-17	62939549	39	hpv68	Positive(+)
2017-08-31	69997568	36	hpv33	Positive(+)
2017-08-31	69997568	36	hpv52	Positive(+)
2017-08-31	63035576	33	hpv18	Positive(+)
2017-08-31	63035576	33	hpv52	Positive(+)
2017-08-31	69660622	42	hpv55	Positive(+)
2017-08-31	69660622	42	hpv82	Positive(+)
2017-09-14	68083684	34	hpv53	Positive(+)
2017-09-14	68083684	34	hpv61	Positive(+)
2017-09-14	69941686	57	hpv51	Positive(+)
2017-09-14	69941686	57	hpv66	Positive(+)
2017-09-20	82386749	52	hpv40	Positive(+)
2017-09-20	82386749	52	hpv81	Positive(+)
2017-09-20	69942763	57	hpv61	Positive(+)
2017-09-20	69942763	57	hpv81	Positive(+)
2017-09-21	83940774	45	hpv18	Positive(+)
2017-09-21	83940774	45	hpv52	Positive(+)
2017-09-21	82418801	50	hpv61	Positive(+)
2017-09-21	82418801	50	hpv68	Positive(+)
2017-09-21	69842818	58	hpv53	Positive(+)
2017-09-21	69842818	58	hpv68	Positive(+)
2017-09-25	83054886	43	hpv45	Positive(+)
2017-09-25	83054886	43	hpv81	Positive(+)
2017-09-25	83729896	28	hpv16	Positive(+)
2017-09-25	83729896	28	hpv68	Positive(+)
2017-09-27	83047049	54	hpv45	Positive(+)
2017-09-27	83047049	54	hpv53	Positive(+)
2017-09-28	83313077	49	hpv11	Positive(+)
2017-09-28	83313077	49	hpv52	Positive(+)
2017-09-28	83304083	49	hpv33	Positive(+)
2017-09-28	83304083	49	hpv35	Positive(+)
2017-09-28	83851099	48	hpv52	Positive(+)
2017-09-28	83851099	48	hpv58	Positive(+)
2017-09-30	83385164	31	hpv58	Positive(+)
2017-09-30	83385164	31	hpv61	Positive(+)
2017-09-30	84073202	48	hpv53	Positive(+)
2017-09-30	84073202	48	hpv58	Positive(+)
2017-10-12	83133275	28	hpv43	Positive(+)
2017-10-12	83133275	28	hpv58	Positive(+)
2017-10-12	72623289	48	hpv51	Positive(+)
2017-10-12	72623289	48	hpv53	Positive(+)
2017-10-19	83653336	28	hpv16	Positive(+)
2017-10-19	83653336	28	hpv44	Positive(+)
2017-11-03	02099485	56	hpv39	Positive(+)
2017-11-03	02099485	56	hpv42	Positive(+)
2017-11-03	83804504	31	hpv39	Positive(+)
2017-11-03	83804504	31	hpv82	Positive(+)
2017-11-07	08053528	53	hpv52	Positive(+)
2017-11-07	08053528	53	hpv59	Positive(+)
2017-11-07	07953554	30	hpv40	Positive(+)
2017-11-07	07953554	30	hpv82	Positive(+)
2017-11-13	08041650	29	hpv31	Positive(+)
2017-11-13	08041650	29	hpv82	Positive(+)
2017-11-23	03639708	41	hpv43	Positive(+)
2017-11-23	03639708	41	hpv06	Positive(+)
2017-11-23	16134737	46	hpv16	Positive(+)
2017-11-23	16134737	46	hpv56	Positive(+)
2018-01-18	30613872	53	hpv55	Positive(+)
2018-01-18	30613872	53	hpv61	Positive(+)
2018-02-22	32929892	54	hpv53	Positive(+)
2018-02-22	32929892	54	hpv55	Positive(+)
2018-02-22	24449894	49	hpv42	Positive(+)
2018-02-22	24449894	49	hpv81	Positive(+)
2018-03-16	37286916	54	hpv81	Positive(+)
2018-03-16	37286916	54	hpv83	Positive(+)
2018-03-28	38937944	32	hpv66	Positive(+)
2018-03-28	38937944	32	hpv55	Positive(+)
2018-04-04	72709951	41	hpv42	Positive(+)
2018-04-04	72709951	41	hpv81	Positive(+)
2018-04-04	47246953	43	hpv39	Positive(+)
2018-04-04	47246953	43	hpv55	Positive(+)
2018-04-04	45387954	44	hpv18	Positive(+)
2018-04-04	45387954	44	hpv39	Positive(+)
2018-04-04	47286961	29	hpv51	Positive(+)
2018-04-04	47286961	29	hpv11	Positive(+)
2018-04-19	51603988	33	hpv45	Positive(+)
2018-04-19	51603988	33	hpv56	Positive(+)
2018-04-19	51900000	50	hpv26	Positive(+)
2018-04-19	51900000	50	hpv43	Positive(+)
2018-05-10	58109129	37	hpv52	Positive(+)
2018-05-10	58109129	37	hpv43	Positive(+)
2018-05-23	16333194	32	hpv31	Positive(+)
2018-05-23	16333194	32	hpv58	Positive(+)
2018-05-23	16685272	38	hpv16	Positive(+)
2018-05-23	16685272	38	hpv68	Positive(+)
2018-06-01	05787295	31	hpv40	Positive(+)
2018-06-01	05787295	31	hpv44	Positive(+)
2018-06-01	19327304	34	hpv56	Positive(+)
2018-06-01	19327304	34	hpv42	Positive(+)
2018-06-21	77364392	55	hpv52	Positive(+)
2018-06-21	77364392	55	hpv53	Positive(+)
2018-06-28	05387406	33	hpv39	Positive(+)
2018-06-28	05387406	33	hpv81	Positive(+)
2018-07-05	22975439	40	hpv51	Positive(+)
2018-07-05	22975439	40	hpv58	Positive(+)
2018-07-19	61395494	52	hpv51	Positive(+)
2018-07-19	61395494	52	hpv61	Positive(+)
2018-07-27	69250533	42	hpv53	Positive(+)
2018-07-27	69250533	42	hpv43	Positive(+)
2018-07-27	85966539	42	hpv52	Positive(+)
2018-07-27	85966539	42	hpv81	Positive(+)
2018-08-01	90059603	44	hpv61	Positive(+)
2018-08-01	90059603	44	hpv81	Positive(+)
2018-08-01	90026622	44	hpv58	Positive(+)
2018-08-01	90026622	44	hpv83	Positive(+)
2018-08-03	87432689	38	hpv16	Positive(+)
2018-08-03	87432689	38	hpv52	Positive(+)
2018-08-03	90745694	49	hpv45	Positive(+)
2018-08-03	90745694	49	hpv43	Positive(+)
2018-08-14	95921773	38	hpv53	Positive(+)
2018-08-14	95921773	38	hpv56	Positive(+)
2018-08-14	90035797	38	hpv18	Positive(+)
2018-08-14	90035797	38	hpv45	Positive(+)
2018-08-14	91992812	34	hpv18	Positive(+)
2018-08-14	91992812	34	hpv52	Positive(+)
2018-08-17	61598854	41	hpv51	Positive(+)
2018-08-17	61598854	41	hpv59	Positive(+)
2018-09-14	01480946	33	hpv06	Positive(+)
2018-09-14	01480946	33	hpv58	Positive(+)
2018-09-14	10687963	35	hpv66	Positive(+)
2018-09-14	10687963	35	hpv43	Positive(+)
2018-09-14	11219984	53	hpv53	Positive(+)
2018-09-14	11219984	53	hpv44	Positive(+)
2018-09-14	05085993	48	hpv06	Positive(+)
2018-09-14	05085993	48	hpv31	Positive(+)
2018-09-21	11215111	51	hpv52	Positive(+)
2018-09-21	11215111	51	hpv61	Positive(+)
2018-09-21	11607125	27	hpv52	Positive(+)
2018-09-21	11607125	27	hpv56	Positive(+)
2018-09-21	11410138	49	hpv51	Positive(+)
2018-09-21	11410138	49	hpv56	Positive(+)
2018-09-21	13453151	50	hpv16	Positive(+)
2018-09-21	13453151	50	hpv81	Positive(+)
2018-09-28	59334167	36	hpv51	Positive(+)
2018-09-28	59334167	36	hpv52	Positive(+)
2018-09-28	72733181	36	hpv06	Positive(+)
2018-09-28	72733181	36	hpv35	Positive(+)
2018-10-16	19075262	38	hpv42	Positive(+)
2018-10-16	19075262	38	hpv81	Positive(+)
2018-10-19	01950280	26	hpv82	Positive(+)
2018-10-19	01950280	26	hpv81	Positive(+)
2018-10-26	13923331	48	hpv59	Positive(+)
2018-10-26	13923331	48	hpv66	Positive(+)
2018-10-30	08002337	32	hpv52	Positive(+)
2018-10-30	08002337	32	hpv68	Positive(+)
2018-10-30	23194346	34	hpv11	Positive(+)
2018-10-30	23194346	34	hpv83	Positive(+)
2018-11-06	08113542	60	hpv18	Positive(+)
2018-11-06	08113542	60	hpv33	Positive(+)
2018-11-14	25416639	41	hpv06	Positive(+)
2018-11-14	25416639	41	hpv81	Positive(+)
2018-11-19	27529663	56	hpv52	Positive(+)
2018-11-19	27529663	56	hpv53	Positive(+)
2018-11-19	22797685	28	hpv51	Positive(+)
2018-11-19	22797685	28	hpv52	Positive(+)
2018-11-26	08043716	53	hpv53	Positive(+)
2018-11-26	08043716	53	hpv58	Positive(+)
2018-11-28	30447807	32	hpv06	Positive(+)
2018-11-28	30447807	32	hpv18	Positive(+)
2018-11-28	94472843	41	hpv53	Positive(+)
2018-11-28	94472843	41	hpv43	Positive(+)
2018-11-30	30709862	34	hpv53	Positive(+)
2018-11-30	30709862	34	hpv58	Positive(+)
2018-11-30	97825908	51	hpv53	Positive(+)
2018-11-30	97825908	51	hpv44	Positive(+)
2018-12-14	32992011	54	hpv53	Positive(+)
2018-12-14	32992011	54	hpv61	Positive(+)
2018-12-21	39889116	45	hpv58	Positive(+)
2018-12-21	39889116	45	hpv42	Positive(+)
2018-12-26	13877142	51	hpv18	Positive(+)
2018-12-26	13877142	51	hpv53	Positive(+)
2018-12-26	14366148	46	hpv66	Positive(+)
2018-12-26	14366148	46	hpv61	Positive(+)
2018-12-26	13869154	54	hpv53	Positive(+)
2018-12-26	13869154	54	hpv66	Positive(+)
2018-12-26	13870165	43	hpv16	Positive(+)
2018-12-26	13870165	43	hpv66	Positive(+)
2018-12-26	40340169	34	hpv52	Positive(+)
2018-12-26	40340169	34	hpv58	Positive(+)
2018-12-28	14200213	44	hpv52	Positive(+)
2018-12-28	14200213	44	hpv81	Positive(+)
2018-12-28	14185237	53	hpv53	Positive(+)
2018-12-28	14185237	53	hpv81	Positive(+)
2018-12-28	14362241	50	hpv35	Positive(+)
2018-12-28	14362241	50	hpv59	Positive(+)
2019-01-04	41358255	24	hpv52	Positive(+)
2019-01-04	41358255	24	hpv82	Positive(+)
2019-01-04	61503259	32	hpv33	Positive(+)
2019-01-04	61503259	32	hpv40	Positive(+)
2019-01-10	68630276	28	hpv51	Positive(+)
2019-01-10	68630276	28	hpv66	Positive(+)
2019-01-10	41733288	38	hpv53	Positive(+)
2019-01-10	41733288	38	hpv61	Positive(+)
2019-01-21	43162298	45	hpv16	Positive(+)
2019-01-21	43162298	45	hpv18	Positive(+)
2019-02-22	45761366	56	hpv56	Positive(+)
2019-02-22	45761366	56	hpv43	Positive(+)
2019-03-01	46908390	28	hpv06	Positive(+)
2019-03-01	46908390	28	hpv16	Positive(+)
2019-03-18	49221458	32	hpv58	Positive(+)
2019-03-18	49221458	32	hpv42	Positive(+)
2019-03-18	39104468	35	hpv56	Positive(+)
2019-03-18	39104468	35	hpv42	Positive(+)
2019-04-04	55185611	34	hpv45	Positive(+)
2019-04-04	55185611	34	hpv52	Positive(+)
2019-05-24	55217940	50	hpv56	Positive(+)
2019-05-24	55217940	50	hpv68	Positive(+)
2019-05-24	55235947	27	hpv55	Positive(+)
2019-05-24	55235947	27	hpv81	Positive(+)
2019-05-31	71288964	58	hpv68	Positive(+)
2019-05-31	71288964	58	hpv83	Positive(+)
2019-05-31	54788998	45	hpv18	Positive(+)
2019-05-31	54788998	45	hpv33	Positive(+)
2019-05-31	25492000	51	hpv16	Positive(+)
2019-05-31	25492000	51	hpv56	Positive(+)
2019-06-06	25494021	37	hpv56	Positive(+)
2019-06-06	25494021	37	hpv43	Positive(+)
2019-06-21	16079089	31	hpv55	Positive(+)
2019-06-21	16079089	31	hpv16	Positive(+)
2019-06-21	43131103	39	hpv31	Positive(+)
2019-06-21	43131103	39	hpv43	Positive(+)
2019-06-21	43135105	30	hpv52	Positive(+)
2019-06-21	43135105	30	hpv66	Positive(+)
2019-06-21	82723144	43	hpv52	Positive(+)
2019-06-21	82723144	43	hpv42	Positive(+)
2019-06-21	82726147	33	hpv66	Positive(+)
2019-06-21	82726147	33	hpv43	Positive(+)
2019-06-28	81234225	48	hpv18	Positive(+)
2019-06-28	81234225	48	hpv16	Positive(+)
2019-06-28	31158279	40	hpv52	Positive(+)
2019-06-28	31158279	40	hpv81	Positive(+)
2019-07-05	31180321	46	hpv18	Positive(+)
2019-07-05	31180321	46	hpv81	Positive(+)
2019-07-05	66186327	37	hpv66	Positive(+)
2019-07-05	66186327	37	hpv43	Positive(+)
2019-07-05	66136346	33	hpv18	Positive(+)
2019-07-05	66136346	33	hpv16	Positive(+)
2019-07-05	66149360	31	hpv55	Positive(+)
2019-07-05	66149360	31	hpv83	Positive(+)
2019-07-11	66147368	40	hpv53	Positive(+)
2019-07-11	66147368	40	hpv44	Positive(+)
2019-07-11	66155376	29	hpv52	Positive(+)
2019-07-11	66155376	29	hpv56	Positive(+)
2019-07-11	66166397	59	hpv45	Positive(+)
2019-07-11	66166397	59	hpv61	Positive(+)
2019-07-11	66176417	55	hpv39	Positive(+)
2019-07-11	66176417	55	hpv52	Positive(+)
2019-07-19	66131442	55	hpv35	Positive(+)
2019-07-19	66131442	55	hpv58	Positive(+)
2019-07-26	66128459	33	hpv39	Positive(+)
2019-07-26	66128459	33	hpv52	Positive(+)
2019-07-26	66127498	49	hpv31	Positive(+)
2019-07-26	66127498	49	hpv33	Positive(+)
2019-07-26	51141502	56	hpv51	Positive(+)
2019-07-26	51141502	56	hpv59	Positive(+)
2019-08-01	51143524	33	hpv51	Positive(+)
2019-08-01	51143524	33	hpv16	Positive(+)
2019-08-08	51147548	44	hpv18	Positive(+)
2019-08-08	51147548	44	hpv16	Positive(+)
2019-08-23	18284631	34	hpv26	Positive(+)
2019-08-23	18284631	34	hpv44	Positive(+)
2019-08-23	18283634	48	hpv51	Positive(+)
2019-08-23	18283634	48	hpv53	Positive(+)
2019-08-23	18291642	45	hpv39	Positive(+)
2019-08-23	18291642	45	hpv59	Positive(+)
2019-08-30	18299680	36	hpv06	Positive(+)
2019-08-30	18299680	36	hpv53	Positive(+)
2019-09-04	43243764	51	hpv53	Positive(+)
2019-09-04	43243764	51	hpv81	Positive(+)
2019-09-04	43245776	31	hpv16	Positive(+)
2019-09-04	43245776	31	hpv44	Positive(+)
2019-09-04	43279780	57	hpv18	Positive(+)
2019-09-04	43279780	57	hpv61	Positive(+)
2019-09-04	83127808	49	hpv18	Positive(+)
2019-09-04	83127808	49	hpv42	Positive(+)
2019-09-06	83198029	40	hpv16	Positive(+)
2019-09-06	83198029	40	hpv66	Positive(+)
2019-09-06	68352031	42	hpv52	Positive(+)
2019-09-06	68352031	42	hpv68	Positive(+)
2019-09-06	33261054	33	hpv18	Positive(+)
2019-09-06	33261054	33	hpv33	Positive(+)
2019-09-06	33235806	45	hpv06	Positive(+)
2019-09-06	33235806	45	hpv66	Positive(+)
2019-09-06	33253974	31	hpv53	Positive(+)
2019-09-06	33253974	31	hpv43	Positive(+)
2019-09-12	42122113	61	hpv42	Positive(+)
2019-09-12	42122113	61	hpv61	Positive(+)
2019-09-12	42132123	56	hpv52	Positive(+)
2019-09-12	42132123	56	hpv82	Positive(+)
2019-09-20	42168179	51	hpv06	Positive(+)
2019-09-20	42168179	51	hpv58	Positive(+)
2019-09-20	42169190	52	hpv16	Positive(+)
2019-09-20	42169190	52	hpv35	Positive(+)
2019-09-20	42166197	56	hpv06	Positive(+)
2019-09-20	42166197	56	hpv55	Positive(+)
2019-09-20	42176217	33	hpv45	Positive(+)
2019-09-20	42176217	33	hpv81	Positive(+)
2019-09-27	59327321	51	hpv59	Positive(+)
2019-09-27	59327321	51	hpv66	Positive(+)
2019-09-27	59447338	41	hpv45	Positive(+)
2019-09-27	59447338	41	hpv56	Positive(+)
2019-09-27	59484345	48	hpv56	Positive(+)
2019-09-27	59484345	48	hpv81	Positive(+)
2019-10-17	53431472	43	hpv06	Positive(+)
2019-10-17	53431472	43	hpv16	Positive(+)
2019-10-24	53419520	58	hpv35	Positive(+)
2019-10-24	53419520	58	hpv59	Positive(+)
2019-10-24	53417540	55	hpv51	Positive(+)
2019-10-24	53417540	55	hpv58	Positive(+)
2019-10-31	45632603	26	hpv18	Positive(+)
2019-10-31	45632603	26	hpv59	Positive(+)
2019-10-31	45672633	41	hpv45	Positive(+)
2019-10-31	45672633	41	hpv51	Positive(+)

## Sheet: Triple infecitons 
Time	Record	Age	HPV genotype	Result
2016-07-28	22041101	59	hpv39	Positive(+)
2016-07-28	22041101	59	hpv42	Positive(+)
2016-07-28	22041101	59	hpv66	Positive(+)
2016-09-18	09033104	27	hpv11	Positive(+)
2016-09-18	09033104	27	hpv43	Positive(+)
2016-09-18	09033104	27	hpv58	Positive(+)
2016-11-18	15253114	45	hpv33	Positive(+)
2016-11-18	15253114	45	hpv52	Positive(+)
2016-11-18	15253114	45	hpv66	Positive(+)
2017-03-14	00019206	30	hpv16	Positive(+)
2017-03-14	00019206	30	hpv44	Positive(+)
2017-03-14	00019206	30	hpv06	Positive(+)
2017-03-17	00088276	47	hpv43	Positive(+)
2017-03-17	00088276	47	hpv45	Positive(+)
2017-03-17	00088276	47	hpv59	Positive(+)
2017-03-22	00014144	37	hpv52	Positive(+)
2017-03-22	00014144	37	hpv68	Positive(+)
2017-03-22	00014144	37	hpv81	Positive(+)
2017-03-24	00126167	47	hpv39	Positive(+)
2017-03-24	00126167	47	hpv61	Positive(+)
2017-03-24	00126167	47	hpv81	Positive(+)
2017-03-30	00211247	35	hpv42	Positive(+)
2017-03-30	00211247	35	hpv66	Positive(+)
2017-03-30	00211247	35	hpv83	Positive(+)
2017-06-16	31520434	50	hpv43	Positive(+)
2017-06-16	31520434	50	hpv61	Positive(+)
2017-06-16	31520434	50	hpv81	Positive(+)
2017-09-21	82986783	51	hpv33	Positive(+)
2017-09-21	82986783	51	hpv52	Positive(+)
2017-09-21	82986783	51	hpv58	Positive(+)
2017-09-22	82145853	34	hpv16	Positive(+)
2017-09-22	82145853	34	hpv33	Positive(+)
2017-09-22	82145853	34	hpv51	Positive(+)
2018-04-26	31868077	50	hpv16	Positive(+)
2018-04-26	31868077	50	hpv39	Positive(+)
2018-04-26	31868077	50	hpv43	Positive(+)
2018-05-23	16086264	33	hpv51	Positive(+)
2018-05-23	16086264	33	hpv43	Positive(+)
2018-05-23	16086264	33	hpv61	Positive(+)
2018-06-01	31397297	38	hpv52	Positive(+)
2018-06-01	31397297	38	hpv56	Positive(+)
2018-06-01	31397297	38	hpv61	Positive(+)
2018-08-09	87533729	41	hpv53	Positive(+)
2018-08-09	87533729	41	hpv58	Positive(+)
2018-08-09	87533729	41	hpv43	Positive(+)
2018-08-31	98830894	48	hpv35	Positive(+)
2018-08-31	98830894	48	hpv58	Positive(+)
2018-08-31	98830894	48	hpv68	Positive(+)
2018-11-06	07904485	31	hpv16	Positive(+)
2018-11-06	07904485	31	hpv52	Positive(+)
2018-11-06	07904485	31	hpv40	Positive(+)
2018-11-14	23348592	55	hpv66	Positive(+)
2018-11-14	23348592	55	hpv82	Positive(+)
2018-11-14	23348592	55	hpv81	Positive(+)
2018-11-14	27860627	32	hpv51	Positive(+)
2018-11-14	27860627	32	hpv53	Positive(+)
2018-11-14	27860627	32	hpv43	Positive(+)
2018-12-21	38080108	54	hpv31	Positive(+)
2018-12-21	38080108	54	hpv51	Positive(+)
2018-12-21	38080108	54	hpv40	Positive(+)
2019-01-10	41821279	32	hpv59	Positive(+)
2019-01-10	41821279	32	hpv43	Positive(+)
2019-01-10	41821279	32	hpv81	Positive(+)
2019-01-10	14253286	38	hpv16	Positive(+)
2019-01-10	14253286	38	hpv53	Positive(+)
2019-01-10	14253286	38	hpv40	Positive(+)
2019-02-01	44206331	49	hpv16	Positive(+)
2019-02-01	44206331	49	hpv59	Positive(+)
2019-02-01	44206331	49	hpv61	Positive(+)
2019-02-15	45028341	48	hpv16	Positive(+)
2019-02-15	45028341	48	hpv53	Positive(+)
2019-02-15	45028341	48	hpv61	Positive(+)
2019-03-07	47590418	51	hpv52	Positive(+)
2019-03-07	47590418	51	hpv56	Positive(+)
2019-03-07	47590418	51	hpv81	Positive(+)
2019-03-29	31581581	39	hpv33	Positive(+)
2019-03-29	31581581	39	hpv42	Positive(+)
2019-03-29	31581581	39	hpv81	Positive(+)
2019-04-04	16450612	48	hpv18	Positive(+)
2019-04-04	16450612	48	hpv43	Positive(+)
2019-04-04	16450612	48	hpv61	Positive(+)
2019-04-26	08052719	64	hpv16	Positive(+)
2019-04-26	08052719	64	hpv44	Positive(+)
2019-04-26	08052719	64	hpv81	Positive(+)
2019-05-24	70608896	35	hpv66	Positive(+)
2019-05-24	70608896	35	hpv43	Positive(+)
2019-05-24	70608896	35	hpv55	Positive(+)
2019-05-24	68588900	29	hpv39	Positive(+)
2019-05-24	68588900	29	hpv53	Positive(+)
2019-05-24	68588900	29	hpv68	Positive(+)
2019-05-24	55217905	38	hpv53	Positive(+)
2019-05-24	55217905	38	hpv58	Positive(+)
2019-05-24	55217905	38	hpv44	Positive(+)
2019-06-06	25495008	55	hpv53	Positive(+)
2019-06-06	25495008	55	hpv58	Positive(+)
2019-06-06	25495008	55	hpv59	Positive(+)
2019-06-06	25503036	36	hpv39	Positive(+)
2019-06-06	25503036	36	hpv59	Positive(+)
2019-06-06	25503036	36	hpv82	Positive(+)
2019-06-14	16082082	40	hpv51	Positive(+)
2019-06-14	16082082	40	hpv52	Positive(+)
2019-06-14	16082082	40	hpv16	Positive(+)
2019-06-28	81217208	50	hpv16	Positive(+)
2019-06-28	81217208	50	hpv18	Positive(+)
2019-06-28	81217208	50	hpv66	Positive(+)
2019-06-28	81228219	48	hpv31	Positive(+)
2019-06-28	81228219	48	hpv61	Positive(+)
2019-06-28	81228219	48	hpv81	Positive(+)
2019-06-28	81233255	36	hpv18	Positive(+)
2019-06-28	81233255	36	hpv35	Positive(+)
2019-06-28	81233255	36	hpv66	Positive(+)
2019-07-05	66137348	54	hpv55	Positive(+)
2019-07-05	66137348	54	hpv83	Positive(+)
2019-07-05	66137348	54	hpv42	Positive(+)
2019-07-05	66146357	34	hpv31	Positive(+)
2019-07-05	66146357	34	hpv52	Positive(+)
2019-07-05	66146357	34	hpv81	Positive(+)
2019-07-26	51145506	56	hpv56	Positive(+)
2019-07-26	51145506	56	hpv66	Positive(+)
2019-07-26	51145506	56	hpv55	Positive(+)
2019-08-08	51168559	66	hpv52	Positive(+)
2019-08-08	51168559	66	hpv44	Positive(+)
2019-08-08	51168559	66	hpv16	Positive(+)
2019-08-08	51130561	32	hpv53	Positive(+)
2019-08-08	51130561	32	hpv68	Positive(+)
2019-08-08	51130561	32	hpv16	Positive(+)
2019-08-16	18235603	41	hpv68	Positive(+)
2019-08-16	18235603	41	hpv81	Positive(+)
2019-08-16	18235603	41	hpv16	Positive(+)
2019-08-30	43217718	40	hpv52	Positive(+)
2019-08-30	43217718	40	hpv43	Positive(+)
2019-08-30	43217718	40	hpv44	Positive(+)
2019-09-04	83136857	51	hpv35	Positive(+)
2019-09-04	83136857	51	hpv55	Positive(+)
2019-09-04	83136857	51	hpv83	Positive(+)
2019-09-06	33257968	34	hpv53	Positive(+)
2019-09-06	33257968	34	hpv59	Positive(+)
2019-09-06	33257968	34	hpv11	Positive(+)
2019-09-20	42181232	47	hpv56	Positive(+)
2019-09-20	42181232	47	hpv58	Positive(+)
2019-09-20	42181232	47	hpv61	Positive(+)
2019-09-27	53480361	59	hpv35	Positive(+)
2019-09-27	53480361	59	hpv53	Positive(+)
2019-09-27	53480361	59	hpv81	Positive(+)
2019-10-11	53454432	32	hpv31	Positive(+)
2019-10-11	53454432	32	hpv39	Positive(+)
2019-10-11	53454432	32	hpv53	Positive(+)
2019-10-17	53438459	46	hpv52	Positive(+)
2019-10-17	53438459	46	hpv58	Positive(+)
2019-10-17	53438459	46	hpv59	Positive(+)
2019-10-24	45611562	30	hpv45	Positive(+)
2019-10-24	45611562	30	hpv68	Positive(+)
2019-10-24	45611562	30	hpv81	Positive(+)
2019-10-24	45612573	51	hpv39	Positive(+)
2019-10-24	45612573	51	hpv52	Positive(+)
2019-10-24	45612573	51	hpv68	Positive(+)
2019-10-31	45630591	51	hpv39	Positive(+)
2019-10-31	45630591	51	hpv61	Positive(+)
2019-10-31	45630591	51	hpv81	Positive(+)
2019-10-31	45635596	32	hpv16	Positive(+)
2019-10-31	45635596	32	hpv52	Positive(+)
2019-10-31	45635596	32	hpv66	Positive(+)

## Sheet: Quadruple infections
Time	Record	Age	HPV genotype	Result
2016-10-29	29666140	54	hpv16	Positive(+)
2016-10-29	29666140	54	hpv43	Positive(+)
2016-10-29	29666140	54	hpv61	Positive(+)
2016-10-29	29666140	54	hpv81	Positive(+)
2017-03-17	00014110	50	hpv52	Positive(+)
2017-03-17	00014110	50	hpv53	Positive(+)
2017-03-17	00014110	50	hpv58	Positive(+)
2017-03-17	00014110	50	hpv59	Positive(+)
2017-07-27	19586513	55	hpv16	Positive(+)
2017-07-27	19586513	55	hpv42	Positive(+)
2017-07-27	19586513	55	hpv44	Positive(+)
2017-07-27	19586513	55	hpv56	Positive(+)
2017-11-16	08014690	35	hpv52	Positive(+)
2017-11-16	08014690	35	hpv55	Positive(+)
2017-11-16	08014690	35	hpv58	Positive(+)
2017-11-16	08014690	35	hpv81	Positive(+)
2019-07-05	31166307	75	hpv39	Positive(+)
2019-07-05	31166307	75	hpv58	Positive(+)
2019-07-05	31166307	75	hpv68	Positive(+)
2019-07-05	31166307	75	hpv43	Positive(+)
2019-08-16	18233604	55	hpv33	Positive(+)
2019-08-16	18233604	55	hpv53	Positive(+)
2019-08-16	18233604	55	hpv58	Positive(+)
2019-08-16	18233604	55	hpv16	Positive(+)
2019-09-27	42189250	27	hpv16	Positive(+)
2019-09-27	42189250	27	hpv33	Positive(+)
2019-09-27	42189250	27	hpv39	Positive(+)
2019-09-27	42189250	27	hpv68	Positive(+)
2019-09-27	59326320	50	hpv18	Positive(+)
2019-09-27	59326320	50	hpv51	Positive(+)
2019-09-27	59326320	50	hpv56	Positive(+)
2019-09-27	59326320	50	hpv61	Positive(+)

## Sheet: Quintet infecitons
Time	Record	Age	HPV genotype	Result
2017-03-08	00121147	27	hpv43	Positive(+)
2017-03-08	00121147	27	hpv51	Positive(+)
2017-03-08	00121147	27	hpv53	Positive(+)
2017-03-08	00121147	27	hpv55	Positive(+)
2017-03-08	00121147	27	hpv68	Positive(+)
2018-07-19	79919488	33	hpv51	Positive(+)
2018-07-19	79919488	33	hpv56	Positive(+)
2018-07-19	79919488	33	hpv66	Positive(+)
2018-07-19	79919488	33	hpv42	Positive(+)
2018-07-19	79919488	33	hpv61	Positive(+)
2018-09-21	13629157	64	hpv16	Positive(+)
2018-09-21	13629157	64	hpv51	Positive(+)
2018-09-21	13629157	64	hpv59	Positive(+)
2018-09-21	13629157	64	hpv55	Positive(+)
2018-09-21	13629157	64	hpv61	Positive(+)
2018-12-07	36375999	24	hpv35	Positive(+)
2018-12-07	36375999	24	hpv56	Positive(+)
2018-12-07	36375999	24	hpv66	Positive(+)
2018-12-07	36375999	24	hpv68	Positive(+)
2018-12-07	36375999	24	hpv83	Positive(+)
2019-05-31	10763973	60	hpv18	Positive(+)
2019-05-31	10763973	60	hpv51	Positive(+)
2019-05-31	10763973	60	hpv53	Positive(+)
2019-05-31	10763973	60	hpv61	Positive(+)
2019-05-31	10763973	60	hpv81	Positive(+)
