# Supplementary material for: Human papillomavirus infection and follow-up on positive results in 7222 female samples obtained from 2016 to 2019 in Hefei, China
Source: PeerJ. 2020 Oct 20;8:e10179. doi: 10.7717/peerj.10179 (PMC7583622; doi:10.7717/peerj.10179)
Supplement: Supplemental Information 3 — Sixty-nine women that had a history of 1 to 4 years of positive infection were followed-up, and 18 [one surgical (cervical cone resection), 6 drug,11 untreated] had infections turn negative. Seventeen of the 51 women whose infections did not turn negative received treatment. [file peerj-08-10179-s003.xlsx]

## Sheet: Raw data of respondents
Respondents ID	Time	Sample	Card number	Age	HPV genotype	Result	Treatment	Treatment measures	Spontaneous symptoms	TCT reexamination	Colposcopy reexamination	Latest HPV genotype assay	HPV infection history (years)
R1	2017-11-07	8560	2017107876	43	hpv16	Positive(+)	Yes	Surgical (cervical cone resection)	NO	NO reexamination	NO reexamination	Still positive	2
	2018-10-30	7349	2017107876	44	hpv16	Positive(+)
R2	2017-01-13	7104	9216500918	28	hpv42	Positive(+)	Yes	Surgical (cervical cone resection)	Inflammation, vaginal itching, leucorrhea clumps	Normal	Normal	Turned negative	2
	2018-04-04	8961	2017147286	29	hpv51	Positive(+)
					hpv11	Positive(+)
	2018-07-05	9438	2017147286	29		Negative(-)
	2019-05-17	8830	2017147286	30		Negative(-)
R3	2017-11-30	8785	2017102041	34		Negative(-)	Yes	Surgical (cervical cone resection)	NO	Normal	Normal	Still positive	2
	2018-08-01	9633	2017102041	35	hpv35	Positive(+)
	2019-02-15	8345	2017102041	35	hpv35	Positive(+)
	2019-09-05	9878		36	hpv35	Positive(+)
R4	2018-11-09	7554	2018126202	42	hpv58	Positive(+)	Yes	Surgical (cervical cone resection)	NO	Normal	NO reexamination	Still positive	2
	2019-10-31	1609		43	hpv58	Positive(+)
R5	2017-11-07	8528	2017108053	53	hpv52	Positive(+)	Yes	Surgical (cervical cone resection)	Inflammation, cervical erosion	NO reexamination	NO reexamination	Still positive	2
					hpv59	Positive(+)
	2018-11-19	7671	2017108053	54	hpv59	Positive(+)
R6	2016-10-29	7140	1101529666	54	hpv16	Positive(+)	Yes	Surgical (cervical cone resection)	NO	NO reexamination	Yes, chronic cervical mucosal inflammation	Still positive	4
					hpv43	Positive(+)
					hpv61	Positive(+)
					hpv81	Positive(+)
	2017-11-23	8742	1101529666	55	hpv16	Positive(+)
	2019-03-22	8557	2017116966	57	hpv33	Positive(+)
R7	2017-11-07	8567	2017108043	52	hpv53	Positive(+)	Yes	Medicine (Interferon)	NO	Normal	Normal	Turned negative	2
					hpv81	Positive(+)
	2018-11-26	7716	2017108043	53	hpv53	Positive(+)
					hpv58	Positive(+)
R8	2017-07-27	7513	2017019586	55	hpv16	Positive(+)	Yes	Medicine (Interferon)）	NO	Normal	Normal	Turned negative	2
					hpv42	Positive(+)
					hpv44	Positive(+)
					hpv56	Positive(+)
	2018-05-17	9159	2017019586	56	hpv56	Positive(+)
					hpv42	Positive(+)
					hpv44	Positive(+)
R9	2018-07-05	9439	2017022975	40	hpv51	Positive(+)	Yes	Medicine (Interferon)	NO	Normal	Normal	Turned negative	1
					hpv58	Positive(+)
	2019-06-21	9171	2017022975	41		Negative(-)
R10	2018-05-23	9266	2017014254	29	hpv53	Positive(+)	Yes	Medicine (Interferon)	NO	Normal	Normal	Turned negative	2
	2019-01-21	8296	2017014254	30	hpv53	Positive(+)
	2019-09-06	1037		30		Negative(-)
R11	2017-11-23	8737	2017116134	46	hpv16	Positive(+)	Yes	Medicine (Interferon)）	NO	Normal	Normal	Turned negative	1
					hpv56	Positive(+)
	2018-12-28	8228	2017116134	47		Negative(-)
R12	2017-11-16	8690	2017108014	35	hpv52	Positive(+)	Yes	Medicine (Interferon + antibiotic)	NO	Normal	Normal	Still positive	2
					hpv55	Positive(+)
					hpv58	Positive(+)
					hpv81	Positive(+)
	2018-10-30	7396	2017108014	36	hpv43	Positive(+)
					hpv81	Positive(+)
R13	2016-10-29	7136	9216500621	40	hpv16	Positive(+)	Yes	Medicine (Interferon)	NO	NO reexamination	NO reexamination	Still positive	3
					hpv18	Positive(+)
	2018-10-26	7311	2017091896	42	hpv42	Positive(+)
R14	2018-08-01	9603	2017190059	44	hpv61	Positive(+)	Yes	Medicine (Anti-inflammatory drugs)	NO	NO reexamination	Normal	Still positive	2
					hpv81	Positive(+)
	2019-09-12	1100		45	hpv61	Positive(+)
R15	2017-11-23	8731	2017114311	34	hpv51	Positive(+)	Yes	Medicine (Interferon)	NO	Normal	NO reexamination	Still positive	2
	2018-12-28	8232	2017114311	35	hpv39	Positive(+)
R16	2018-05-23	9269	2017167758	41	hpv55	Positive(+)	Yes	Medicine (Interferon)	NO	NO reexamination	NO reexamination	Still positive	2
	2019-07-19	9448		42	hpv35	Positive(+)
R17	2017-11-07	8568	2017107987	54	hpv66	Positive(+)	Yes	Medicine (Interferon)	NO	Normal	NO reexamination	Still positive	2
	2018-10-30	7373	2017107987	55	hpv55	Positive(+)
R18	2018-05-03	9092	2017158014	36	hpv11	Positive(+)	Yes	Medicine (Interferon + Baofukangshuan)	NO	Normal	NO reexamination	Still positive	2
	2019-10-17	1451		37	hpv53	Positive(+)
R19	2017-11-07	8541	2017108052	62		Negative(-)	Yes	Medicine (Interferon + Amoxicillin)	NO	NO reexamination	NO reexamination	Still positive	2
	2018-10-30	7385	2017108052	63	hpv44	Positive(+)
					hpv81	Positive(+)
	2019-04-26	8719	2017108052	64	hpv16	Positive(+)
					hpv44	Positive(+)
					hpv81	Positive(+)
R20	2016-10-14	7108	160928105	45	hpv35	Positive(+)	Yes	Medicine (Interferon)	NO	Normal	Normal	Still positive	4
					hpv61	Positive(+)
	2017-08-17	7540	2017063109	46	hpv61	Positive(+)
					hpv81	Positive(+)
	2019-06-28	9219		48	hpv31	Positive(+)
					hpv61	Positive(+)
					hpv81	Positive(+)
R21	2017-11-23	8735	2017114253	36		Negative(-)	Yes	Medicine (Baofukangshuan)	NO	Normal	NO reexamination	Still positive	1
	2019-01-10	8286	2017114253	38	hpv16	Positive(+)
					hpv53	Positive(+)
					hpv40	Positive(+)
R22	2018-07-27	9543	2017186120	39	hpv55	Positive(+)	Yes	Medicine (Interferon + Baofukangshuan)	NO	NO reexamination	NO reexamination	Still positive	2
	2019-08-08	9564		40	hpv55	Positive(+)
R23	2017-10-19	8353	2017091303	64	hpv53	Positive(+)	Yes	Medicine (Interferon)	NO	NO reexamination	Normal	Still positive	3
	2019-09-27	1348		66	hpv53	Positive(+)
R24	2017-03-07	7128	9291000010	32		Negative(-)	Yes	Medicine (Interferon)	NO	Normal	Normal	Turned negative	2
	2018-05-23	9264	2017016086	33	hpv51	Positive(+)
					hpv43	Positive(+)
					hpv61	Positive(+)
	2019-03-18	8452	2017016086	34	hpv51	Positive(+)
					hpv43	Positive(+)
R25	2017-03-08	7156	9291000027	40	hpv61	Positive(+)	NO	NO	NO	Normal	Normal	Turned negative	2
					hpv81	Positive(+)
	2018-05-23	9218	2017016134	41	hpv61	Positive(+)
	2019-03-29	8592	2017016134	42		Negative(-)
R26	2018-04-19	9031	2017153230	35	hpv55	Positive(+)	NO	NO	NO	Normal	Normal	Turned negative	2
	2019-04-19	8699	2017153230	36	hpv55	Positive(+)
	2019-05-24	8920	2017153230	36		Negative(-)
R27	2017-11-23	8719	2017111209	29		Negative(-)	NO	NO	NO	Normal	Normal	Turned negative	1
	2018-08-14	9795	2017111209	30	hpv58	Positive(+)
	2018-12-14	8055	2017111209	30	hpv58	Positive(+)
	2019-09-06	9934		31		Negative(-)
R28	2017-05-04	7307	1100650923	49	hpv35	Positive(+)	NO	NO	NO	Normal	Normal	Turned negative	1
					hpv51	Positive(+)
	2018-04-19	9009	2017147085	50		Negative(-)
	2019-04-19	8706	2017147085	51		Negative(-)
R29	2017-03-28	7199	9291000005	35	hpv52	Positive(+)	NO	NO	NO	Normal	Normal	Turned negative	2
	2018-06-14	9370	2017016066	36	hpv52	Positive(+)
	2019-04-26	8766	2017016066	37		Negative(-)
R30	2018-08-01	9578	2017189966	36	hpv44	Positive(+)	NO	NO	NO	Normal	Normal	Turned negative	1
	2018-12-07	7959	2017189966	36	hpv44	Positive(+)
	2019-09-06	1001		37		Negative(-)
R31	2017-03-07	7110	9291000025	49	hpv52	Positive(+)	NO	NO	NO	Normal	Normal	Turned negative	2
	2018-06-01	9313	2017016129	50	hpv52	Positive(+)
	2019-03-29	8595	2017016129	51		Negative(-)
R32	2017-11-07	8554	2017107953	30	hpv40	Positive(+)	NO	NO	NO	Normal	Normal	Turned negative	1
					hpv82	Positive(+)
	2018-11-09	7588	2017107953	31		Negative(-)
R33	2018-04-04	8951	2017072709	41	hpv42	Positive(+)	NO	NO	NO	NO reexamination	NO reexamination	Still positive	2
					hpv81	Positive(+)
	2019-01-25	8307	2017072709	42	hpv42	Positive(+)
R34	2017-03-22	7120	9291000075	41	hpv39	Positive(+)	NO	NO	NO	NO reexamination	NO reexamination	Still positive	2
					hpv61	Positive(+)
	2018-06-07	9354	2017016330	42		Negative(-)
	2019-03-18	8497	2017016330	43	hpv61	Positive(+)
R35	2017-10-12	8289	2017072623	48	hpv51	Positive(+)	NO	NO	NO	NO reexamination	NO reexamination	Still positive	3
					hpv53	Positive(+)
	2019-10-24	1583		50	hpv53	Positive(+)
R36	2017-11-07	8591	2017108002	31	hpv31	Positive(+)	NO	NO	NO	Normal	NO reexamination	Still positive	2
					hpv68	Positive(+)
	2018-10-30	7337	2017108002	32	hpv52	Positive(+)
					hpv68	Positive(+)
R37	2018-08-01	9622	2017190026	44	hpv58	Positive(+)	NO	NO	NO	NO reexamination	NO reexamination	Still positive	2
					hpv83	Positive(+)
	2019-09-05	9864		45	hpv58	Positive(+)
					hpv44	Positive(+)
R38	2018-09-14	9979	2017110154	47	hpv45	Positive(+)	NO	NO	NO	Normal	NO reexamination	Still positive	2
	2019-09-12	1134		48	hpv52	Positive(+)
R39	2018-10-12	7217	2017061603	37	hpv55	Positive(+)	NO	NO	NO	NO reexamination	NO reexamination	Still positive	2
	2019-07-11	9381		38	hpv39	Positive(+)
R40	2018-07-05	9456	2017180239	74	hpv39	Positive(+)	NO	NO	NO	NO reexamination	NO reexamination	Still positive	2
					hpv58	Positive(+)
					hpv43	Positive(+)
	2019-07-05	9307		75	hpv39	Positive(+)
					hpv58	Positive(+)
					hpv68	Positive(+)
					hpv43	Positive(+)
R41	2017-10-19	8364	9272200010	26	hpv66	Positive(+)	NO	NO	NO	NO reexamination	NO reexamination	Still positive	3
	2019-01-10	8276	2017168630	28	hpv51	Positive(+)
					hpv66	Positive(+)
R42	2017-06-16	7435	2017031581	37	hpv81	Positive(+)	NO	NO	NO	Normal	NO reexamination	Still positive	3
	2019-03-29	8581	2017031581	39	hpv33	Positive(+)
					hpv42	Positive(+)
					hpv81	Positive(+)
R43	2017-03-22	7102	9212700262	45		Negative(-)	NO	NO	NO	NO reexamination	NO reexamination	Still positive	2
	2018-08-01	9624	2017190061	46		Negative(-)
	2018-12-14	8031	2017190061	46	hpv56	Positive(+)
	2019-09-20	1232		47	hpv56	Positive(+)
					hpv58	Positive(+)
					hpv61	Positive(+)
R44	2016-10-14	7105	160928103	52		Negative(-)	NO	NO	NO	Atypical squamous cells	NO reexamination	Still positive	1
	2019-10-24	1540		55	hpv51	Positive(+)
					hpv58	Positive(+)
R45	2018-07-27	9545	2017180235	42		Negative(-)	NO	NO	NO	NO reexamination	NO reexamination	Still positive	1
	2019-10-17	1472		43	hpv06	Positive(+)
					hpv16	Positive(+)
R46	2017-05-12	7328	9259000002	36		Negative(-)	NO	NO	NO	Normal	NO reexamination	Still positive	2
	2018-04-19	9044	2017153226	38	hpv61	Positive(+)
	2019-04-26	8737	2017153226	39	hpv61	Positive(+)
R47	2016-11-11	7144	161109010	52		Negative(-)	NO	NO	NO	Normal	Normal	Turned negative	1
	2018-02-22	8892	2017132929	54	hpv53	Positive(+)
					hpv55	Positive(+)
R48	2017-11-03	8489	2017102067	42		Negative(-)	NO	NO	NO	Atypical squamous cells	NO reexamination	Still positive	1
	2018-08-31	9887	2017102067	43	hpv52	Positive(+)
	2018-12-21	8104	2017102067	43	hpv52	Positive(+)
R49	2017-11-23	8710	2017111247	47	hpv52	Positive(+)	NO	NO	NO	NO reexamination	NO reexamination	Still positive	3
	2019-09-06	9978		49	hpv52	Positive(+)
R50	2016-11-11	7131	161104003	29	hpv52	Positive(+)	NO	NO	NO	NO reexamination	NO reexamination	Still positive	3
	2018-08-17	9848	2017172765	31	hpv52	Positive(+)
R51	2018-10-16	7273	2018119038	56	hpv58	Positive(+)	NO	NO	NO	NO reexamination	NO reexamination	Still positive	2
	2019-10-17	1479		57	hpv58	Positive(+)
R52	2017-05-26	7392	9259000005	37	hpv52	Positive(+)	NO	NO	NO	NO reexamination	NO reexamination	Still positive	3
	2018-05-03	9091	2017153229	39	hpv52	Positive(+)
	2019-04-26	8741	2017153229	40	hpv52	Positive(+)
R53	2018-08-14	9790	2017189999	30	hpv81	Positive(+)	NO	NO	NO	NO reexamination	NO reexamination	Still positive	1
	2018-12-14	8057	2017189999	30	hpv81	Positive(+)
R54	2018-04-12	8969	2017143019	45	hpv82	Positive(+)	NO	NO	NO	NO reexamination	NO reexamination	Still positive	2
	2019-05-31	8988	2017143019	46	hpv82	Positive(+)
R55	2018-12-14	8066	2017102092	65	hpv52	Positive(+)	NO	NO	NO	NO reexamination	NO reexamination	Still positive	2
	2019-09-12	1087		66	hpv52	Positive(+)
R56	2018-08-09	9706	2017191280	47	hpv44	Positive(+)	NO	NO	NO	NO reexamination	NO reexamination	Still positive	2
	2019-08-23	9664		48	hpv44	Positive(+)
R57	2018-05-03	9097	2017159034	52	hpv61	Positive(+)	NO	NO	NO	NO reexamination	NO reexamination	Still positive	2
	2019-05-10	8788	2017159034	53	hpv61	Positive(+)
R58	2018-04-19	9003	2017146987	46	hpv53	Positive(+)	NO	NO	NO	NO reexamination	NO reexamination	Still positive	2
	2019-05-31	8956	2017146987	47	hpv53	Positive(+)
R59	2018-08-14	9820	2017191989	41	hpv61	Positive(+)	NO	NO	NO	Normal	NO reexamination	Still positive	2
	2019-09-05	9940		42	hpv61	Positive(+)
R60	2017-07-07	7491	2017034872	29	hpv52	Positive(+)	NO	NO	Inflammation, abnormal smell, bleeding	Normal	NO reexamination	Still positive	3
	2019-09-06	1051		31	hpv52	Positive(+)
R61	2017-11-23	8724	2017111205	35	hpv66	Positive(+)	NO	NO	NO	NO reexamination	NO reexamination	Still positive	3
	2018-08-14	9819	2017111205	36	hpv66	Positive(+)
	2018-12-14	8058	2017111205	36	hpv66	Positive(+)
	2019-09-06	1035		37	hpv66	Positive(+)
R62	2016-12-13	7105	9285900179	47	hpv42	Positive(+)	NO	NO	NO	Normal	Normal	Turned negative	2
	2017-10-12	8280	2017085363	48	hpv42	Positive(+)
R63	2017-03-24	7189	9291000035	38	hpv59	Positive(+)	NO	NO	NO	NO reexamination	NO reexamination	Still positive	3
	2019-05-17	8864	2017016267	40	hpv59	Positive(+)
R64	2018-08-14	9831	2017190046	31	hpv82	Positive(+)	NO	NO	NO	Normal	NO reexamination	Still positive	1
	2018-12-07	7969	2017190046	31	hpv82	Positive(+)
R65	2017-11-30	8771	2017108037	55	hpv61	Positive(+)	NO	NO	NO	Normal	NO reexamination	Still positive	2
	2018-10-30	7358	2017108037	56	hpv61	Positive(+)
R66	2017-11-16	8699	2017107946	48	hpv52	Positive(+)	NO	NO	NO	Normal	NO reexamination	Still positive	2
	2018-10-30	7395	2017107946	49	hpv52	Positive(+)
R67	2017-11-07	8516	2017098603	36	hpv52	Positive(+)	NO	NO	NO	Normal	Normal	Turned negative	2
	2018-11-06	7468	2017098603	37	hpv52	Positive(+)
R68	2017-11-13	8649	2017107990	52	hpv56	Positive(+)	NO	NO	Inflammation	NO reexamination	NO reexamination	Still positive	2
	2018-11-06	7490	2017107990	53	hpv56	Positive(+)
R69	2018-08-14	9778	2017102075	43	hpv52	Positive(+)	NO	NO	NO	NO reexamination	NO reexamination	Still positive	2
	2019-09-06	9965		44	hpv52	Positive(+)

## Sheet: Surgical（6）
Respondents ID	Time	Sample	Card number	Age	HPV genotype	Result	Treatment	Treatment measures	Spontaneous symptoms	TCT reexamination	Colposcopy reexamination	Latest HPV genotype assay	HPV infection history (years)
R1	2017-11-07	8560	2017107876	43	hpv16	Positive(+)	Yes	Surgical (cervical cone resection)	NO	NO reexamination	NO reexamination	Still positive	2
	2018-10-30	7349	2017107876	44	hpv16	Positive(+)
R2	2017-01-13	7104	9216500918	28	hpv42	Positive(+)	Yes	Surgical (cervical cone resection)	Inflammation, vaginal itching, leucorrhea clumps	Normal	Normal	Turned negative	2
	2018-04-04	8961	2017147286	29	hpv51	Positive(+)
					hpv11	Positive(+)
	2018-07-05	9438	2017147286	29		Negative(-)
	2019-05-17	8830	2017147286	30		Negative(-)
R3	2017-11-30	8785	2017102041	34		Negative(-)	Yes	Surgical (cervical cone resection)	NO	Normal	Normal	Still positive	2
	2018-08-01	9633	2017102041	35	hpv35	Positive(+)
	2019-02-15	8345	2017102041	35	hpv35	Positive(+)
	2019-09-05	9878		36	hpv35	Positive(+)
R4	2018-11-09	7554	2018126202	42	hpv58	Positive(+)	Yes	Surgical (cervical cone resection)	NO	Normal	NO reexamination	Still positive	2
	2019-10-31	1609		43	hpv58	Positive(+)
R5	2017-11-07	8528	2017108053	53	hpv52	Positive(+)	Yes	Surgical (cervical cone resection)	Inflammation, cervical erosion	NO reexamination	NO reexamination	Still positive	2
					hpv59	Positive(+)
	2018-11-19	7671	2017108053	54	hpv59	Positive(+)
R6	2016-10-29	7140	1101529666	54	hpv16	Positive(+)	Yes	Surgical (cervical cone resection)	NO	NO reexamination	Yes, chronic cervical mucosal inflammation	Still positive	4
					hpv43	Positive(+)
					hpv61	Positive(+)
					hpv81	Positive(+)
	2017-11-23	8742	1101529666	55	hpv16	Positive(+)
	2019-03-22	8557	2017116966	57	hpv33	Positive(+)

## Sheet: Medicine（18）
Respondents ID	Time	Sample	Card number	Age	HPV genotype	Result	Treatment	Treatment measures	Spontaneous symptoms	TCT reexamination	colposcopy reexamination	Latest HPV genotype assay	HPV infection history (years)
R7	2017-11-07	8567	2017108043	52	hpv53	Positive(+)	Yes	Medicine (Interferon)	NO	Normal	Normal	Turned negative	2
					hpv81	Positive(+)
	2018-11-26	7716	2017108043	53	hpv53	Positive(+)
					hpv58	Positive(+)
R8	2017-07-27	7513	2017019586	55	hpv16	Positive(+)	Yes	Medicine (Interferon)）	NO	Normal	Normal	Turned negative	2
					hpv42	Positive(+)
					hpv44	Positive(+)
					hpv56	Positive(+)
	2018-05-17	9159	2017019586	56	hpv56	Positive(+)
					hpv42	Positive(+)
					hpv44	Positive(+)
R9	2018-07-05	9439	2017022975	40	hpv51	Positive(+)	Yes	Medicine (Interferon)	NO	Normal	Normal	Turned negative	1
					hpv58	Positive(+)
	2019-06-21	9171	2017022975	41		Negative(-)
R10	2018-05-23	9266	2017014254	29	hpv53	Positive(+)	Yes	Medicine (Interferon)	NO	Normal	Normal	Turned negative	2
	2019-01-21	8296	2017014254	30	hpv53	Positive(+)
	2019-09-06	1037		30		Negative(-)
R11	2017-11-23	8737	2017116134	46	hpv16	Positive(+)	Yes	Medicine (Interferon)）	NO	Normal	Normal	Turned negative	1
					hpv56	Positive(+)
	2018-12-28	8228	2017116134	47		Negative(-)
R12	2017-11-16	8690	2017108014	35	hpv52	Positive(+)	Yes	Medicine (Interferon + antibiotic)	NO	Normal	Normal	Still positive	2
					hpv55	Positive(+)
					hpv58	Positive(+)
					hpv81	Positive(+)
	2018-10-30	7396	2017108014	36	hpv43	Positive(+)
					hpv81	Positive(+)
R13	2016-10-29	7136	9216500621	40	hpv16	Positive(+)	Yes	Medicine (Interferon)	NO	NO reexamination	NO reexamination	Still positive	3
					hpv18	Positive(+)
	2018-10-26	7311	2017091896	42	hpv42	Positive(+)
R14	2018-08-01	9603	2017190059	44	hpv61	Positive(+)	Yes	Medicine (Anti-inflammatory drugs)	NO	NO reexamination	Normal	Still positive	2
					hpv81	Positive(+)
	2019-09-12	1100		45	hpv61	Positive(+)
R15	2017-11-23	8731	2017114311	34	hpv51	Positive(+)	Yes	Medicine (Interferon)	NO	Normal	NO reexamination	Still positive	2
	2018-12-28	8232	2017114311	35	hpv39	Positive(+)
R16	2018-05-23	9269	2017167758	41	hpv55	Positive(+)	Yes	Medicine (Interferon)	NO	NO reexamination	NO reexamination	Still positive	2
	2019-07-19	9448		42	hpv35	Positive(+)
R17	2017-11-07	8568	2017107987	54	hpv66	Positive(+)	Yes	Medicine (Interferon)	NO	Normal	NO reexamination	Still positive	2
	2018-10-30	7373	2017107987	55	hpv55	Positive(+)
R18	2018-05-03	9092	2017158014	36	hpv11	Positive(+)	Yes	Medicine (Interferon + Baofukangshuan)	NO	Normal	NO reexamination	Still positive	2
	2019-10-17	1451		37	hpv53	Positive(+)
R19	2017-11-07	8541	2017108052	62		Negative(-)	Yes	Medicine (Interferon + Amoxicillin)	NO	NO reexamination	NO reexamination	Still positive	2
	2018-10-30	7385	2017108052	63	hpv44	Positive(+)
					hpv81	Positive(+)
	2019-04-26	8719	2017108052	64	hpv16	Positive(+)
					hpv44	Positive(+)
					hpv81	Positive(+)
R20	2016-10-14	7108	160928105	45	hpv35	Positive(+)	Yes	Medicine (Interferon)	NO	Normal	Normal	Still positive	4
					hpv61	Positive(+)
	2017-08-17	7540	2017063109	46	hpv61	Positive(+)
					hpv81	Positive(+)
	2019-06-28	9219		48	hpv31	Positive(+)
					hpv61	Positive(+)
					hpv81	Positive(+)
R21	2017-11-23	8735	2017114253	36		Negative(-)	Yes	Medicine (Baofukangshuan)	NO	Normal	NO reexamination	Still positive	1
	2019-01-10	8286	2017114253	38	hpv16	Positive(+)
					hpv53	Positive(+)
					hpv40	Positive(+)
R22	2018-07-27	9543	2017186120	39	hpv55	Positive(+)	Yes	Medicine (Interferon + Baofukangshuan)	NO	NO reexamination	NO reexamination	Still positive	2
	2019-08-08	9564		40	hpv55	Positive(+)
R23	2017-10-19	8353	2017091303	64	hpv53	Positive(+)	Yes	Medicine (Interferon)	NO	NO reexamination	Normal	Still positive	3
	2019-09-27	1348		66	hpv53	Positive(+)
R24	2017-03-07	7128	9291000010	32		Negative(-)	Yes	Medicine (Interferon)	NO	Normal	Normal	Turned negative	2
	2018-05-23	9264	2017016086	33	hpv51	Positive(+)
					hpv43	Positive(+)
					hpv61	Positive(+)
	2019-03-18	8452	2017016086	34	hpv51	Positive(+)
					hpv43	Positive(+)

## Sheet: Untreated（45）
Respondents ID	Time	Sample	Card number	Age	HPV genotype	Result	Treatment	Treatment measures	Spontaneous symptoms	TCT reexamination	Colposcopy reexamination	Latest HPV genotype assay	HPV infection history (years)
R25	2017-03-08	7156	9291000027	40	hpv61	Positive(+)	NO	NO	NO	Normal	Normal	Turned negative	2
					hpv81	Positive(+)
	2018-05-23	9218	2017016134	41	hpv61	Positive(+)
	2019-03-29	8592	2017016134	42		Negative(-)
R26	2018-04-19	9031	2017153230	35	hpv55	Positive(+)	NO	NO	NO	Normal	Normal	Turned negative	2
	2019-04-19	8699	2017153230	36	hpv55	Positive(+)
	2019-05-24	8920	2017153230	36		Negative(-)
R27	2017-11-23	8719	2017111209	29		Negative(-)	NO	NO	NO	Normal	Normal	Turned negative	1
	2018-08-14	9795	2017111209	30	hpv58	Positive(+)
	2018-12-14	8055	2017111209	30	hpv58	Positive(+)
	2019-09-06	9934		31		Negative(-)
R28	2017-05-04	7307	1100650923	49	hpv35	Positive(+)	NO	NO	NO	Normal	Normal	Turned negative	1
					hpv51	Positive(+)
	2018-04-19	9009	2017147085	50		Negative(-)
	2019-04-19	8706	2017147085	51		Negative(-)
R29	2017-03-28	7199	9291000005	35	hpv52	Positive(+)	NO	NO	NO	Normal	Normal	Turned negative	2
	2018-06-14	9370	2017016066	36	hpv52	Positive(+)
	2019-04-26	8766	2017016066	37		Negative(-)
R30	2018-08-01	9578	2017189966	36	hpv44	Positive(+)	NO	NO	NO	Normal	Normal	Turned negative	1
	2018-12-07	7959	2017189966	36	hpv44	Positive(+)
	2019-09-06	1001		37		Negative(-)
R31	2017-03-07	7110	9291000025	49	hpv52	Positive(+)	NO	NO	NO	Normal	Normal	Turned negative	2
	2018-06-01	9313	2017016129	50	hpv52	Positive(+)
	2019-03-29	8595	2017016129	51		Negative(-)
R32	2017-11-07	8554	2017107953	30	hpv40	Positive(+)	NO	NO	NO	Normal	Normal	Turned negative	1
					hpv82	Positive(+)
	2018-11-09	7588	2017107953	31		Negative(-)
R33	2018-04-04	8951	2017072709	41	hpv42	Positive(+)	NO	NO	NO	NO reexamination	NO reexamination	Still positive	2
					hpv81	Positive(+)
	2019-01-25	8307	2017072709	42	hpv42	Positive(+)
R34	2017-03-22	7120	9291000075	41	hpv39	Positive(+)	NO	NO	NO	NO reexamination	NO reexamination	Still positive	2
					hpv61	Positive(+)
	2018-06-07	9354	2017016330	42		Negative(-)
	2019-03-18	8497	2017016330	43	hpv61	Positive(+)
R35	2017-10-12	8289	2017072623	48	hpv51	Positive(+)	NO	NO	NO	NO reexamination	NO reexamination	Still positive	3
					hpv53	Positive(+)
	2019-10-24	1583		50	hpv53	Positive(+)
R36	2017-11-07	8591	2017108002	31	hpv31	Positive(+)	NO	NO	NO	Normal	NO reexamination	Still positive	2
					hpv68	Positive(+)
	2018-10-30	7337	2017108002	32	hpv52	Positive(+)
					hpv68	Positive(+)
R37	2018-08-01	9622	2017190026	44	hpv58	Positive(+)	NO	NO	NO	NO reexamination	NO reexamination	Still positive	2
					hpv83	Positive(+)
	2019-09-05	9864		45	hpv58	Positive(+)
					hpv44	Positive(+)
R38	2018-09-14	9979	2017110154	47	hpv45	Positive(+)	NO	NO	NO	Normal	NO reexamination	Still positive	2
	2019-09-12	1134		48	hpv52	Positive(+)
R39	2018-10-12	7217	2017061603	37	hpv55	Positive(+)	NO	NO	NO	NO reexamination	NO reexamination	Still positive	2
	2019-07-11	9381		38	hpv39	Positive(+)
R40	2018-07-05	9456	2017180239	74	hpv39	Positive(+)	NO	NO	NO	NO reexamination	NO reexamination	Still positive	2
					hpv58	Positive(+)
					hpv43	Positive(+)
	2019-07-05	9307		75	hpv39	Positive(+)
					hpv58	Positive(+)
					hpv68	Positive(+)
					hpv43	Positive(+)
R41	2017-10-19	8364	9272200010	26	hpv66	Positive(+)	NO	NO	NO	NO reexamination	NO reexamination	Still positive	3
	2019-01-10	8276	2017168630	28	hpv51	Positive(+)
					hpv66	Positive(+)
R42	2017-06-16	7435	2017031581	37	hpv81	Positive(+)	NO	NO	NO	Normal	NO reexamination	Still positive	3
	2019-03-29	8581	2017031581	39	hpv33	Positive(+)
					hpv42	Positive(+)
					hpv81	Positive(+)
R43	2017-03-22	7102	9212700262	45		Negative(-)	NO	NO	NO	NO reexamination	NO reexamination	Still positive	2
	2018-08-01	9624	2017190061	46		Negative(-)
	2018-12-14	8031	2017190061	46	hpv56	Positive(+)
	2019-09-20	1232		47	hpv56	Positive(+)
					hpv58	Positive(+)
					hpv61	Positive(+)
R44	2016-10-14	7105	160928103	52		Negative(-)	NO	NO	NO	Atypical squamous cells	NO reexamination	Still positive	1
	2019-10-24	1540		55	hpv51	Positive(+)
					hpv58	Positive(+)
R45	2018-07-27	9545	2017180235	42		Negative(-)	NO	NO	NO	NO reexamination	NO reexamination	Still positive	1
	2019-10-17	1472		43	hpv06	Positive(+)
					hpv16	Positive(+)
R46	2017-05-12	7328	9259000002	36		Negative(-)	NO	NO	NO	Normal	NO reexamination	Still positive	2
	2018-04-19	9044	2017153226	38	hpv61	Positive(+)
	2019-04-26	8737	2017153226	39	hpv61	Positive(+)
R47	2016-11-11	7144	161109010	52		Negative(-)	NO	NO	NO	Normal	Normal	Turned negative	1
	2018-02-22	8892	2017132929	54	hpv53	Positive(+)
					hpv55	Positive(+)
R48	2017-11-03	8489	2017102067	42		Negative(-)	NO	NO	NO	Atypical squamous cells	NO reexamination	Still positive	1
	2018-08-31	9887	2017102067	43	hpv52	Positive(+)
	2018-12-21	8104	2017102067	43	hpv52	Positive(+)
R49	2017-11-23	8710	2017111247	47	hpv52	Positive(+)	NO	NO	NO	NO reexamination	NO reexamination	Still positive	3
	2019-09-06	9978		49	hpv52	Positive(+)
R50	2016-11-11	7131	161104003	29	hpv52	Positive(+)	NO	NO	NO	NO reexamination	NO reexamination	Still positive	3
	2018-08-17	9848	2017172765	31	hpv52	Positive(+)
R51	2018-10-16	7273	2018119038	56	hpv58	Positive(+)	NO	NO	NO	NO reexamination	NO reexamination	Still positive	2
	2019-10-17	1479		57	hpv58	Positive(+)
R52	2017-05-26	7392	9259000005	37	hpv52	Positive(+)	NO	NO	NO	NO reexamination	NO reexamination	Still positive	3
	2018-05-03	9091	2017153229	39	hpv52	Positive(+)
	2019-04-26	8741	2017153229	40	hpv52	Positive(+)
R53	2018-08-14	9790	2017189999	30	hpv81	Positive(+)	NO	NO	NO	NO reexamination	NO reexamination	Still positive	1
	2018-12-14	8057	2017189999	30	hpv81	Positive(+)
R54	2018-04-12	8969	2017143019	45	hpv82	Positive(+)	NO	NO	NO	NO reexamination	NO reexamination	Still positive	2
	2019-05-31	8988	2017143019	46	hpv82	Positive(+)
R55	2018-12-14	8066	2017102092	65	hpv52	Positive(+)	NO	NO	NO	NO reexamination	NO reexamination	Still positive	2
	2019-09-12	1087		66	hpv52	Positive(+)
R56	2018-08-09	9706	2017191280	47	hpv44	Positive(+)	NO	NO	NO	NO reexamination	NO reexamination	Still positive	2
	2019-08-23	9664		48	hpv44	Positive(+)
R57	2018-05-03	9097	2017159034	52	hpv61	Positive(+)	NO	NO	NO	NO reexamination	NO reexamination	Still positive	2
	2019-05-10	8788	2017159034	53	hpv61	Positive(+)
R58	2018-04-19	9003	2017146987	46	hpv53	Positive(+)	NO	NO	NO	NO reexamination	NO reexamination	Still positive	2
	2019-05-31	8956	2017146987	47	hpv53	Positive(+)
R59	2018-08-14	9820	2017191989	41	hpv61	Positive(+)	NO	NO	NO	Normal	NO reexamination	Still positive	2
	2019-09-05	9940		42	hpv61	Positive(+)
R60	2017-07-07	7491	2017034872	29	hpv52	Positive(+)	NO	NO	Inflammation, abnormal smell, bleeding	Normal	NO reexamination	Still positive	3
	2019-09-06	1051		31	hpv52	Positive(+)
R61	2017-11-23	8724	2017111205	35	hpv66	Positive(+)	NO	NO	NO	NO reexamination	NO reexamination	Still positive	3
	2018-08-14	9819	2017111205	36	hpv66	Positive(+)
	2018-12-14	8058	2017111205	36	hpv66	Positive(+)
	2019-09-06	1035		37	hpv66	Positive(+)
R62	2016-12-13	7105	9285900179	47	hpv42	Positive(+)	NO	NO	NO	Normal	Normal	Turned negative	2
	2017-10-12	8280	2017085363	48	hpv42	Positive(+)
R63	2017-03-24	7189	9291000035	38	hpv59	Positive(+)	NO	NO	NO	NO reexamination	NO reexamination	Still positive	3
	2019-05-17	8864	2017016267	40	hpv59	Positive(+)
R64	2018-08-14	9831	2017190046	31	hpv82	Positive(+)	NO	NO	NO	Normal	NO reexamination	Still positive	1
	2018-12-07	7969	2017190046	31	hpv82	Positive(+)
R65	2017-11-30	8771	2017108037	55	hpv61	Positive(+)	NO	NO	NO	Normal	NO reexamination	Still positive	2
	2018-10-30	7358	2017108037	56	hpv61	Positive(+)
R66	2017-11-16	8699	2017107946	48	hpv52	Positive(+)	NO	NO	NO	Normal	NO reexamination	Still positive	2
	2018-10-30	7395	2017107946	49	hpv52	Positive(+)
R67	2017-11-07	8516	2017098603	36	hpv52	Positive(+)	NO	NO	NO	Normal	Normal	Turned negative	2
	2018-11-06	7468	2017098603	37	hpv52	Positive(+)
R68	2017-11-13	8649	2017107990	52	hpv56	Positive(+)	NO	NO	Inflammation	NO reexamination	NO reexamination	Still positive	2
	2018-11-06	7490	2017107990	53	hpv56	Positive(+)
R69	2018-08-14	9778	2017102075	43	hpv52	Positive(+)	NO	NO	NO	NO reexamination	NO reexamination	Still positive	2
	2019-09-06	9965		44	hpv52	Positive(+)

## Sheet: Turned negative
Name	Time	Sample	Card number	Age	HPV genotype	Result	Treatment	Treatment measures	Spontaneous symptoms	TCT reexamination	colposcopy reexamination	Latest HPV genotype assay	HPV infection history (years)
R2	2017-01-13	7104	9216500918	28	hpv42	Positive(+)	Yes	Surgical (cervical cone resection)	Inflammation, vaginal itching, leucorrhea clumps	Normal	Normal	Turned negative	2
	2018-04-04	8961	2017147286	29	hpv51	Positive(+)
					hpv11	Positive(+)
	2018-07-05	9438	2017147286	29		Negative(-)
	2019-05-17	8830	2017147286	30		Negative(-)
R7	2017-11-07	8567	2017108043	52	hpv53	Positive(+)	Yes	Medicine (Interferon)	NO	Normal	Normal	Turned negative	2
					hpv81	Positive(+)
	2018-11-26	7716	2017108043	53	hpv53	Positive(+)
					hpv58	Positive(+)
R8	2017-07-27	7513	2017019586	55	hpv16	Positive(+)	Yes	Medicine (Interferon)）	NO	Normal	Normal	Turned negative	2
					hpv42	Positive(+)
					hpv44	Positive(+)
					hpv56	Positive(+)
	2018-05-17	9159	2017019586	56	hpv56	Positive(+)
					hpv42	Positive(+)
					hpv44	Positive(+)
R9	2018-07-05	9439	2017022975	40	hpv51	Positive(+)	Yes	Medicine (Interferon)	NO	Normal	Normal	Turned negative	1
					hpv58	Positive(+)
	2019-06-21	9171	2017022975	41		Negative(-)
R10	2018-05-23	9266	2017014254	29	hpv53	Positive(+)	Yes	Medicine (Interferon)	NO	Normal	Normal	Turned negative	2
	2019-01-21	8296	2017014254	30	hpv53	Positive(+)
	2019-09-06	1037		30		Negative(-)
R11	2017-11-23	8737	2017116134	46	hpv16	Positive(+)	Yes	Medicine (Interferon)）	NO	Normal	Normal	Turned negative	1
					hpv56	Positive(+)
	2018-12-28	8228	2017116134	47		Negative(-)
R24	2017-03-07	7128	9291000010	32		Negative(-)	Yes	Medicine (Interferon)	NO	Normal	Normal	Turned negative	2
	2018-05-23	9264	2017016086	33	hpv51	Positive(+)
					hpv43	Positive(+)
					hpv61	Positive(+)
	2019-03-18	8452	2017016086	34	hpv51	Positive(+)
					hpv43	Positive(+)
R25	2017-03-08	7156	9291000027	40	hpv61	Positive(+)	NO	NO	NO	Normal	Normal	Turned negative	2
					hpv81	Positive(+)
	2018-05-23	9218	2017016134	41	hpv61	Positive(+)
	2019-03-29	8592	2017016134	42		Negative(-)
R26	2018-04-19	9031	2017153230	35	hpv55	Positive(+)	NO	NO	NO	Normal	Normal	Turned negative	2
	2019-04-19	8699	2017153230	36	hpv55	Positive(+)
	2019-05-24	8920	2017153230	36		Negative(-)
R27	2017-11-23	8719	2017111209	29		Negative(-)	NO	NO	NO	Normal	Normal	Turned negative	1
	2018-08-14	9795	2017111209	30	hpv58	Positive(+)
	2018-12-14	8055	2017111209	30	hpv58	Positive(+)
	2019-09-06	9934		31		Negative(-)
R28	2017-05-04	7307	1100650923	49	hpv35	Positive(+)	NO	NO	NO	Normal	Normal	Turned negative	1
					hpv51	Positive(+)
	2018-04-19	9009	2017147085	50		Negative(-)
	2019-04-19	8706	2017147085	51		Negative(-)
R29	2017-03-28	7199	9291000005	35	hpv52	Positive(+)	NO	NO	NO	Normal	Normal	Turned negative	2
	2018-06-14	9370	2017016066	36	hpv52	Positive(+)
	2019-04-26	8766	2017016066	37		Negative(-)
R30	2018-08-01	9578	2017189966	36	hpv44	Positive(+)	NO	NO	NO	Normal	Normal	Turned negative	1
	2018-12-07	7959	2017189966	36	hpv44	Positive(+)
	2019-09-06	1001		37		Negative(-)
R31	2017-03-07	7110	9291000025	49	hpv52	Positive(+)	NO	NO	NO	Normal	Normal	Turned negative	2
	2018-06-01	9313	2017016129	50	hpv52	Positive(+)
	2019-03-29	8595	2017016129	51		Negative(-)
R32	2017-11-07	8554	2017107953	30	hpv40	Positive(+)	NO	NO	NO	Normal	Normal	Turned negative	1
					hpv82	Positive(+)
	2018-11-09	7588	2017107953	31		Negative(-)
R47	2016-11-11	7144	161109010	52		Negative(-)	NO	NO	NO	Normal	Normal	Turned negative	1
	2018-02-22	8892	2017132929	54	hpv53	Positive(+)
					hpv55	Positive(+)
R62	2016-12-13	7105	9285900179	47	hpv42	Positive(+)	NO	NO	NO	Normal	Normal	Turned negative	2
	2017-10-12	8280	2017085363	48	hpv42	Positive(+)
R67	2017-11-07	8516	2017098603	36	hpv52	Positive(+)	NO	NO	NO	Normal	Normal	Turned negative	2
	2018-11-06	7468	2017098603	37	hpv52	Positive(+)

## Sheet: Still positive
Name	Time	Sample	Card number	Age	HPV genotype	Result	Treatment	Treatment measures	Spontaneous symptoms	TCT reexamination	Colposcopy reexamination	Latest HPV genotype assay	HPV infection history (years)
R1	2017-11-07	8560	2017107876	43	hpv16	Positive(+)	Yes	Surgical (cervical cone resection)	NO	NO reexamination	NO reexamination	Still positive	2
	2018-10-30	7349	2017107876	44	hpv16	Positive(+)
R3	2017-11-30	8785	2017102041	34		Negative(-)	Yes	Surgical (cervical cone resection)	NO	Normal	Normal	Still positive	2
	2018-08-01	9633	2017102041	35	hpv35	Positive(+)
	2019-02-15	8345	2017102041	35	hpv35	Positive(+)
	2019-09-05	9878		36	hpv35	Positive(+)
R4	2018-11-09	7554	2018126202	42	hpv58	Positive(+)	Yes	Surgical (cervical cone resection)	NO	Normal	NO reexamination	Still positive	2
	2019-10-31	1609		43	hpv58	Positive(+)
R5	2017-11-07	8528	2017108053	53	hpv52	Positive(+)	Yes	Surgical (cervical cone resection)	Inflammation, cervical erosion	NO reexamination	NO reexamination	Still positive	2
					hpv59	Positive(+)
	2018-11-19	7671	2017108053	54	hpv59	Positive(+)
R6	2016-10-29	7140	1101529666	54	hpv16	Positive(+)	Yes	Surgical (cervical cone resection)	NO	NO reexamination	Yes, chronic cervical mucosal inflammation	Still positive	4
					hpv43	Positive(+)
					hpv61	Positive(+)
					hpv81	Positive(+)
	2017-11-23	8742	1101529666	55	hpv16	Positive(+)
	2019-03-22	8557	2017116966	57	hpv33	Positive(+)
R12	2017-11-16	8690	2017108014	35	hpv52	Positive(+)	Yes	Medicine (Interferon + antibiotic)	NO	Normal	Normal	Still positive	2
					hpv55	Positive(+)
					hpv58	Positive(+)
					hpv81	Positive(+)
	2018-10-30	7396	2017108014	36	hpv43	Positive(+)
					hpv81	Positive(+)
R13	2016-10-29	7136	9216500621	40	hpv16	Positive(+)	Yes	Medicine (Interferon)	NO	NO reexamination	NO reexamination	Still positive	3
					hpv18	Positive(+)
	2018-10-26	7311	2017091896	42	hpv42	Positive(+)
R14	2018-08-01	9603	2017190059	44	hpv61	Positive(+)	Yes	Medicine (Anti-inflammatory drugs)	NO	NO reexamination	Normal	Still positive	2
					hpv81	Positive(+)
	2019-09-12	1100		45	hpv61	Positive(+)
R15	2017-11-23	8731	2017114311	34	hpv51	Positive(+)	Yes	Medicine (Interferon)	NO	Normal	NO reexamination	Still positive	2
	2018-12-28	8232	2017114311	35	hpv39	Positive(+)
R16	2018-05-23	9269	2017167758	41	hpv55	Positive(+)	Yes	Medicine (Interferon)	NO	NO reexamination	NO reexamination	Still positive	2
	2019-07-19	9448		42	hpv35	Positive(+)
R17	2017-11-07	8568	2017107987	54	hpv66	Positive(+)	Yes	Medicine (Interferon)	NO	Normal	NO reexamination	Still positive	2
	2018-10-30	7373	2017107987	55	hpv55	Positive(+)
R18	2018-05-03	9092	2017158014	36	hpv11	Positive(+)	Yes	Medicine (Interferon + Baofukangshuan)	NO	Normal	NO reexamination	Still positive	2
	2019-10-17	1451		37	hpv53	Positive(+)
R19	2017-11-07	8541	2017108052	62		Negative(-)	Yes	Medicine (Interferon + Amoxicillin)	NO	NO reexamination	NO reexamination	Still positive	2
	2018-10-30	7385	2017108052	63	hpv44	Positive(+)
					hpv81	Positive(+)
	2019-04-26	8719	2017108052	64	hpv16	Positive(+)
					hpv44	Positive(+)
					hpv81	Positive(+)
R20	2016-10-14	7108	160928105	45	hpv35	Positive(+)	Yes	Medicine (Interferon)	NO	Normal	Normal	Still positive	4
					hpv61	Positive(+)
	2017-08-17	7540	2017063109	46	hpv61	Positive(+)
					hpv81	Positive(+)
	2019-06-28	9219		48	hpv31	Positive(+)
					hpv61	Positive(+)
					hpv81	Positive(+)
R21	2017-11-23	8735	2017114253	36		Negative(-)	Yes	Medicine (Baofukangshuan)	NO	Normal	NO reexamination	Still positive	1
	2019-01-10	8286	2017114253	38	hpv16	Positive(+)
					hpv53	Positive(+)
					hpv40	Positive(+)
R22	2018-07-27	9543	2017186120	39	hpv55	Positive(+)	Yes	Medicine (Interferon + Baofukangshuan)	NO	NO reexamination	NO reexamination	Still positive	2
	2019-08-08	9564		40	hpv55	Positive(+)
R23	2017-10-19	8353	2017091303	64	hpv53	Positive(+)	Yes	Medicine (Interferon)	NO	NO reexamination	Normal	Still positive	3
	2019-09-27	1348		66	hpv53	Positive(+)
R33	2018-04-04	8951	2017072709	41	hpv42	Positive(+)	NO	NO	NO	NO reexamination	NO reexamination	Still positive	2
					hpv81	Positive(+)
	2019-01-25	8307	2017072709	42	hpv42	Positive(+)
R34	2017-03-22	7120	9291000075	41	hpv39	Positive(+)	NO	NO	NO	NO reexamination	NO reexamination	Still positive	2
					hpv61	Positive(+)
	2018-06-07	9354	2017016330	42		Negative(-)
	2019-03-18	8497	2017016330	43	hpv61	Positive(+)
R35	2017-10-12	8289	2017072623	48	hpv51	Positive(+)	NO	NO	NO	NO reexamination	NO reexamination	Still positive	3
					hpv53	Positive(+)
	2019-10-24	1583		50	hpv53	Positive(+)
R36	2017-11-07	8591	2017108002	31	hpv31	Positive(+)	NO	NO	NO	Normal	NO reexamination	Still positive	2
					hpv68	Positive(+)
	2018-10-30	7337	2017108002	32	hpv52	Positive(+)
					hpv68	Positive(+)
R37	2018-08-01	9622	2017190026	44	hpv58	Positive(+)	NO	NO	NO	NO reexamination	NO reexamination	Still positive	2
					hpv83	Positive(+)
	2019-09-05	9864		45	hpv58	Positive(+)
					hpv44	Positive(+)
R38	2018-09-14	9979	2017110154	47	hpv45	Positive(+)	NO	NO	NO	Normal	NO reexamination	Still positive	2
	2019-09-12	1134		48	hpv52	Positive(+)
R39	2018-10-12	7217	2017061603	37	hpv55	Positive(+)	NO	NO	NO	NO reexamination	NO reexamination	Still positive	2
	2019-07-11	9381		38	hpv39	Positive(+)
R40	2018-07-05	9456	2017180239	74	hpv39	Positive(+)	NO	NO	NO	NO reexamination	NO reexamination	Still positive	2
					hpv58	Positive(+)
					hpv43	Positive(+)
	2019-07-05	9307		75	hpv39	Positive(+)
					hpv58	Positive(+)
					hpv68	Positive(+)
					hpv43	Positive(+)
R41	2017-10-19	8364	9272200010	26	hpv66	Positive(+)	NO	NO	NO	NO reexamination	NO reexamination	Still positive	3
	2019-01-10	8276	2017168630	28	hpv51	Positive(+)
					hpv66	Positive(+)
R42	2017-06-16	7435	2017031581	37	hpv81	Positive(+)	NO	NO	NO	Normal	NO reexamination	Still positive	3
	2019-03-29	8581	2017031581	39	hpv33	Positive(+)
					hpv42	Positive(+)
					hpv81	Positive(+)
R43	2017-03-22	7102	9212700262	45		Negative(-)	NO	NO	NO	NO reexamination	NO reexamination	Still positive	2
	2018-08-01	9624	2017190061	46		Negative(-)
	2018-12-14	8031	2017190061	46	hpv56	Positive(+)
	2019-09-20	1232		47	hpv56	Positive(+)
					hpv58	Positive(+)
					hpv61	Positive(+)
R44	2016-10-14	7105	160928103	52		Negative(-)	NO	NO	NO	Atypical squamous cells	NO reexamination	Still positive	1
	2019-10-24	1540		55	hpv51	Positive(+)
					hpv58	Positive(+)
R45	2018-07-27	9545	2017180235	42		Negative(-)	NO	NO	NO	NO reexamination	NO reexamination	Still positive	1
	2019-10-17	1472		43	hpv06	Positive(+)
					hpv16	Positive(+)
R46	2017-05-12	7328	9259000002	36		Negative(-)	NO	NO	NO	Normal	NO reexamination	Still positive	2
	2018-04-19	9044	2017153226	38	hpv61	Positive(+)
	2019-04-26	8737	2017153226	39	hpv61	Positive(+)
R48	2017-11-03	8489	2017102067	42		Negative(-)	NO	NO	NO	Atypical squamous cells	NO reexamination	Still positive	1
	2018-08-31	9887	2017102067	43	hpv52	Positive(+)
	2018-12-21	8104	2017102067	43	hpv52	Positive(+)
R49	2017-11-23	8710	2017111247	47	hpv52	Positive(+)	NO	NO	NO	NO reexamination	NO reexamination	Still positive	3
	2019-09-06	9978		49	hpv52	Positive(+)
R50	2016-11-11	7131	161104003	29	hpv52	Positive(+)	NO	NO	NO	NO reexamination	NO reexamination	Still positive	3
	2018-08-17	9848	2017172765	31	hpv52	Positive(+)
R51	2018-10-16	7273	2018119038	56	hpv58	Positive(+)	NO	NO	NO	NO reexamination	NO reexamination	Still positive	2
	2019-10-17	1479		57	hpv58	Positive(+)
R52	2017-05-26	7392	9259000005	37	hpv52	Positive(+)	NO	NO	NO	NO reexamination	NO reexamination	Still positive	3
	2018-05-03	9091	2017153229	39	hpv52	Positive(+)
	2019-04-26	8741	2017153229	40	hpv52	Positive(+)
R53	2018-08-14	9790	2017189999	30	hpv81	Positive(+)	NO	NO	NO	NO reexamination	NO reexamination	Still positive	1
	2018-12-14	8057	2017189999	30	hpv81	Positive(+)
R54	2018-04-12	8969	2017143019	45	hpv82	Positive(+)	NO	NO	NO	NO reexamination	NO reexamination	Still positive	2
	2019-05-31	8988	2017143019	46	hpv82	Positive(+)
R55	2018-12-14	8066	2017102092	65	hpv52	Positive(+)	NO	NO	NO	NO reexamination	NO reexamination	Still positive	2
	2019-09-12	1087		66	hpv52	Positive(+)
R56	2018-08-09	9706	2017191280	47	hpv44	Positive(+)	NO	NO	NO	NO reexamination	NO reexamination	Still positive	2
	2019-08-23	9664		48	hpv44	Positive(+)
R57	2018-05-03	9097	2017159034	52	hpv61	Positive(+)	NO	NO	NO	NO reexamination	NO reexamination	Still positive	2
	2019-05-10	8788	2017159034	53	hpv61	Positive(+)
R58	2018-04-19	9003	2017146987	46	hpv53	Positive(+)	NO	NO	NO	NO reexamination	NO reexamination	Still positive	2
	2019-05-31	8956	2017146987	47	hpv53	Positive(+)
R59	2018-08-14	9820	2017191989	41	hpv61	Positive(+)	NO	NO	NO	Normal	NO reexamination	Still positive	2
	2019-09-05	9940		42	hpv61	Positive(+)
R60	2017-07-07	7491	2017034872	29	hpv52	Positive(+)	NO	NO	Inflammation, abnormal smell, bleeding	Normal	NO reexamination	Still positive	3
	2019-09-06	1051		31	hpv52	Positive(+)
R61	2017-11-23	8724	2017111205	35	hpv66	Positive(+)	NO	NO	NO	NO reexamination	NO reexamination	Still positive	3
	2018-08-14	9819	2017111205	36	hpv66	Positive(+)
	2018-12-14	8058	2017111205	36	hpv66	Positive(+)
	2019-09-06	1035		37	hpv66	Positive(+)
R63	2017-03-24	7189	9291000035	38	hpv59	Positive(+)	NO	NO	NO	NO reexamination	NO reexamination	Still positive	3
	2019-05-17	8864	2017016267	40	hpv59	Positive(+)
R64	2018-08-14	9831	2017190046	31	hpv82	Positive(+)	NO	NO	NO	Normal	NO reexamination	Still positive	1
	2018-12-07	7969	2017190046	31	hpv82	Positive(+)
R65	2017-11-30	8771	2017108037	55	hpv61	Positive(+)	NO	NO	NO	Normal	NO reexamination	Still positive	2
	2018-10-30	7358	2017108037	56	hpv61	Positive(+)
R66	2017-11-16	8699	2017107946	48	hpv52	Positive(+)	NO	NO	NO	Normal	NO reexamination	Still positive	2
	2018-10-30	7395	2017107946	49	hpv52	Positive(+)
R68	2017-11-13	8649	2017107990	52	hpv56	Positive(+)	NO	NO	Inflammation	NO reexamination	NO reexamination	Still positive	2
	2018-11-06	7490	2017107990	53	hpv56	Positive(+)
R69	2018-08-14	9778	2017102075	43	hpv52	Positive(+)	NO	NO	NO	NO reexamination	NO reexamination	Still positive	2
	2019-09-06	9965		44	hpv52	Positive(+)
